# Supplementary material
Source: PubMed Central journal article supplement (PMC4333582)

# Experimental Lineage and Functional Analysis of a Remotely Directed Peptide Epoxidation Catalyst

*Phillip A. Lichtor and Scott J. Miller\**

Department of Chemistry, Yale University, P.O. Box 208107, New Haven, CT 06520-8107

AUTHOR EMAIL ADDRESS: [scott.miller@yale.edu](mailto:scott.miller@yale.edu)

## Supporting Information

### Table of Contents

|                                                                |           |
|----------------------------------------------------------------|-----------|
| General Information                                            | Page S-2  |
| On-bead library synthesis and screening                        | Page S-3  |
| Testing, synthesis, and characterization of truncated peptides | Page S-4  |
| NMR experiments and modeling of peptide <b>1</b>               | Page S-14 |
| NMR experiments with peptide <b>7</b>                          | Page S-20 |
| Experiments with farnesyl methyl ether ( <b>13</b> )           | Page S-22 |
| Experiments with difarnesyl ether ( <b>18</b> )                | Page S-26 |
| NMR spectra                                                    | Page S-28 |

## General information

NMR spectra were acquired at ambient temperature. The concentration of the peptide NMR samples was 20 mM with respect to peptide, unless otherwise specified. Spectra were processed using MestReNova 8.1 using default phasing and baseline correction features.  $^1\text{H}$  NMR spectra are calibrated to an internal TMS standard (0.00 ppm) or residual solvent peak (7.26 ppm in  $\text{CDCl}_3$ ).  $^{13}\text{C}$  NMR spectra were completely proton decoupled and are calibrated to  $\text{CHCl}_3$  (77.16 ppm). NMR spectral data are reported as chemical shift (multiplicity, coupling constants, integration). Multiplets were reported from the “multiplet analysis” feature of MestReNova with some manual adjustment. Multiplicity is reported as follows: singlet (s), doublet (d), doublet of doubles (dd), triplet (t), quartet (q), and multiplet (m), *etc.*

Gas chromatography (GC) was performed on an instrument with two HP-5 columns (50 m, 0.320 mm diameter, 0.25  $\mu\text{m}$  film thickness) and flame ionization detectors using He as a carrier gas. Site-selectivity ratios for the monoepoxides of farnesol are reported as the area of the indicated peak to the sum of the areas of all the monoepoxide products. For method detail and characterization of farnesol oxidation products, see the Supplementary Information of Lichtor, P. A.; Miller, S. J. *Nature Chem.* **2012**, *4*, 990-995. Details pertaining to other GC methods are included where relevant.

Analytical thin-layer chromatography (TLC) was performed using Silica Gel 60 Å  $\text{F}_{254}$  pre-coated plates (0.25 mm thickness) and visualized using irradiation by a UV lamp and/or staining with  $\text{I}_2/\text{silica}$ , and/or cerium ammonium molybdate (CAM). Flash column chromatography was performed using Silica Gel 60 Å (32-63 micron).

Peptide sequencing and high-resolution liquid chromatography-mass spectrometry (HRMS) was performed on a Waters XEVO instrument equipped with ESI, a QToF mass spectrometer, and a photodiode array detector.

Reverse phase chromatography was performed with a Biotage instrument.

## On-bead library synthesis and screening

### *Study of split-and-pool libraries*

Split-and-pool libraries were synthesized and screened as described previously.<sup>1</sup> Briefly described, the peptide libraries were synthesized on Polystyrene A NH<sub>2</sub> macrobeads (500-560  $\mu$ m) using double deprotections and double couplings to Fmoc-protected amino acids (except when coupling to the N-terminal Boc-Asp(O<sub>F</sub>m)-OH). Before synthesizing peptide libraries, the resin was first coupled to Fmoc-Met-OH and then to three Fmoc-Ahx-OH (Ahx = 6-aminohexanoic acid) residues.

### *Study of parallel synthesis library*

Peptides sequences that were evaluated in Table 1 were synthesized on A RAM macrobeads (500-560  $\mu$ m), which were first coupled to a single Fmoc-Ahx-OH residue (3 equiv; 3 equiv HOBt, 3 equiv HBTU; 6 equiv iPr<sub>2</sub>EtN; DMF).

Peptide sequences were then attached to the resin by first deprotecting with two ~20 min treatments with 20% (v/v) piperidine in DMF and then using single couplings in DMF with Fmoc-protected amino acids (4 equiv), HBTU (4 equiv), HOBt•H<sub>2</sub>O (4 equiv), and iPr<sub>2</sub>EtN (8 equiv). Upon addition of the coupling reagents, the resin mixture was sealed and generally mixed for 3-6 h on a rotary mixer, and then drained, washing with a combination of DMF, DCM, and/or CH<sub>3</sub>OH. Following the final coupling to Boc-Asp(O<sub>F</sub>m)-OH, the resin was then treated with two ~20 min treatments with 20% (v/v) piperidine in DMF, and then washed with copious DMF, DCM, and/or CH<sub>3</sub>OH.

---

<sup>1</sup> Lichtor, P. A.; Miller, S. J. *Nature Chem.* **2012**, *4*, 990-995.

Some of the on-bead synthesized peptides were checked by treating a single bead with 100% TFA for 30 min and then concentrating the resulting mixture under N<sub>2</sub>. The resulting cleaved material was analyzed by LC/MS/MS and confirmed to contain expected peptide/fragment masses.

To 400  $\mu$ L glass reaction vials containing a single bead was added 0.5  $\mu$ L of an aqueous solution of H<sub>2</sub>O<sub>2</sub> (2 M, 1 equiv). Immediately following the H<sub>2</sub>O<sub>2</sub> addition, 5.05  $\mu$ L of a DCM solution containing farnesol (1  $\mu$ mol, 1 equiv), DIC (0.3  $\mu$ mol, 0.3 equiv), HOBt•H<sub>2</sub>O (0.1  $\mu$ mol, 0.1 equiv), and DMAP (0.1  $\mu$ mol, 0.1 equiv) was then added to start the reaction. The vials were sealed and allowed to stand for 12 h before quenching with 20  $\mu$ L of a saturated aqueous solution of Na<sub>2</sub>SO<sub>3</sub>, vortexing with additional 220  $\mu$ L hexanes, and analyzing by GC.

## **Testing, synthesis, and characterization of truncated peptides**

### ***General procedure for screening truncated catalyst analogs***

Peptide (0.1 equiv) was added into a tared screw cap test tube with DCM. The solvent was concentrated, the tube was weighed, and the peptide mass was determined. Farnesol (1.0 equiv) was weighed into the tube and then a stir bar was added. A solution of HOBt•H<sub>2</sub>O (0.1 equiv) and DMAP (0.1 equiv) in CHCl<sub>3</sub> (to bring reaction to 0.2 M with respect to farnesol; solvent passed through basic alumina) was then added, washing down the sides of the tube, followed by H<sub>2</sub>O<sub>2</sub> (1.5 equiv, 30% w/w aqueous solution). The tube was placed in an ice bath and chilled. DIC (1.1 equiv) was added and the tube was immediately placed in an iPrOH bath maintained at -20 °C by cryostat. The reaction was stirred for 48 h before quenching with saturated aqueous Na<sub>2</sub>SO<sub>3</sub>, warming to room temperature, and then mixing vigorously with additional saturated aqueous NaHCO<sub>3</sub> and hexanes. After the layers

separated, an aliquot of the organic layer was removed, diluted with hexanes and EtOAc and analyzed by GC.

### ***General protocols for truncated peptide synthesis***

Solution peptide synthesis. To peptide acid (1 equiv) was added amine coupling partner (1.0-1.1 equiv), EDC•HCl (1.1 equiv), HOBt•H<sub>2</sub>O (1.1 equiv), and DCM (to 0.1 M in peptide acid). iPr<sub>2</sub>EtN or Et<sub>3</sub>N (1.2 equiv) was also added if the amine coupling partner was the hydrochloride salt. The resulting solution was allowed to stir until the reaction was deemed complete as determined by LCMS, usually 3-48 h. The reaction solution was diluted with additional DCM and then washed with aqueous 0.5 M citric acid, half-saturated brine, and saturated aqueous NaHCO<sub>3</sub>. The combined organics were dried over Na<sub>2</sub>SO<sub>4</sub>, filtered, and concentrated.

Solid phase peptide coupling protocol. To pre-swollen resin was added Fmoc-protected amino acid (3 equiv), HBTU (3 equiv), HOBt•H<sub>2</sub>O (3 equiv) with DMF, followed by iPr<sub>2</sub>EtN (6 equiv). The resin mixture was sealed and mixed for 3-6 h on a rotary mixer and then drained, washing with a combination of DMF, DCM, and/or CH<sub>3</sub>OH. If required for the next coupling, the Fmoc-protecting group was removed with two treatments of 20% piperidine in DMF (v/v) for 20 min each.

Standard Fm-ester deprotection. To protected peptide was added 1:1 (v/v) solution of Et<sub>2</sub>NH and DCM. The resulting solution was swirled occasionally over the course of 30-60 min before concentrating via rotary evaporator. The resulting material was dissolved in DCM and then concentrated further. Typically, the crude material was loaded on a silica gel column as a solution in DCM, where it was eluted with a gradient of 1% CH<sub>3</sub>OH to 4% CH<sub>3</sub>OH in 1% AcOH/DCM.

Hydrogenolysis Protocol. To a flask containing peptide and stir bar was added a slurry of 10% (wt.) Pd/C in CH<sub>3</sub>OH (~0.1 M). The flask was sealed with a septum and the reaction atmosphere was flushed

first with N<sub>2</sub>, and then H<sub>2</sub>. The reaction was allowed to stir under pressure of a balloon filled with H<sub>2</sub>. Once the reaction was deemed complete as determined by LCMS, the reaction atmosphere was flushed with N<sub>2</sub>. The crude reaction mixture was then filtered through celite and concentrated.

### Synthesis and characterization of truncated peptides

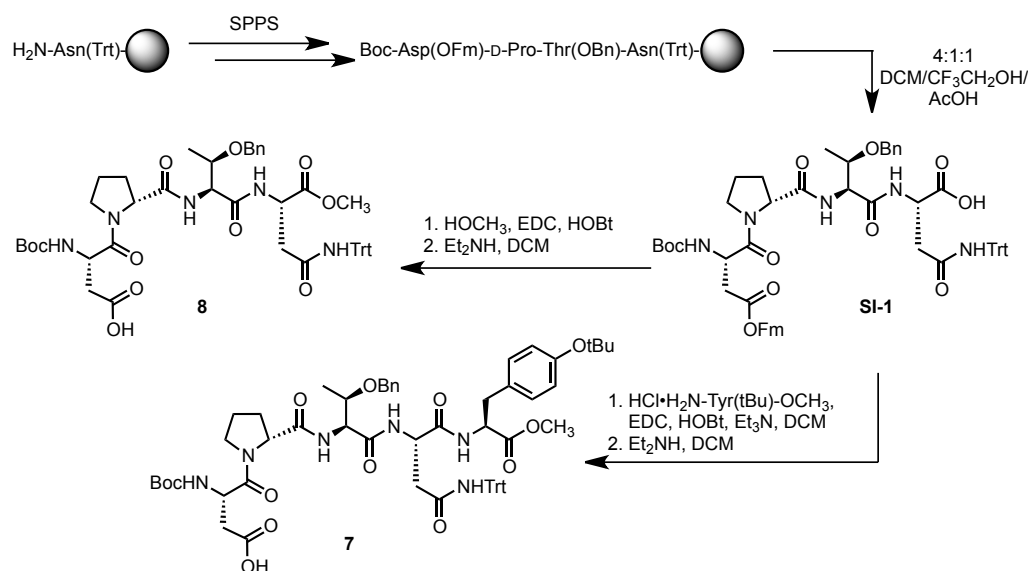

**SI Figure 1.** Synthesis of peptides 7 and 8.

Synthesis of peptide 7 and 8 began from common intermediate **SI-1** (SI Figure 1), which was synthesized starting with 2-chlorotrityl resin, preloaded with Asn(Trt), and then coupling the appropriate amino acid monomers (Fmoc-Thr(Bn)-OH, Fmoc-DPro-OH, and then Boc-Asp(OFm)-OH) using the Solid Phase Peptide Coupling protocol. Resin was cleaved with a 4:1:1 mixture of DCM: 2,2,2-trifluoroethanol: acetic acid, treating for 30-60 min before draining. The resulting solution, along with washes, was concentrated a couple of times with additional toluene.

Intermediate **SI-1** was coupled to HCl•H<sub>2</sub>N-Tyr(tBu)-OCH<sub>3</sub> (1.1 equiv) using the Solution Peptide Synthesis protocol with additional Et<sub>3</sub>N. After work-up, the crude material was deprotected using the

Standard Fm-ester Deprotection protocol, and upon concentration, was purified with a silica gel column eluted with a gradient of 1% to 4% CH<sub>3</sub>OH in 1% AcOH/DCM (as described in the standard protocol). A portion of this material was further purified by reverse phase chromatography using a Biotage C18 column eluting with a gradient of 40% CH<sub>3</sub>OH to 100% CH<sub>3</sub>OH in water with 0.1% formic acid.

Peptide **7**: white solid. **TLC**: 4% CH<sub>3</sub>OH, 1% AcOH in DCM ( $R_f$  = 0.38). **<sup>1</sup>H NMR** (500 MHz, CDCl<sub>3</sub>):  $\delta$  7.62 (d,  $J$  = 7.9 Hz, 1H), 7.52 (s, 1H), 7.46 (d,  $J$  = 7.4 Hz, 1H), 7.32 – 7.10 (m, 20H), 6.97 (d,  $J$  = 8.5 Hz, 1H), 6.89 (d,  $J$  = 8.5 Hz, 1H), 6.64 (d,  $J$  = 9.2 Hz, 1H), 6.22 (d,  $J$  = 10.3 Hz, 1H), 4.89 – 4.82 (m, 1H), 4.81 – 4.73 (m, 1H), 4.63 – 4.55 (m, 1H), 4.49, 4.41 (ABq,  $J_{AB}$  = 11.4 Hz, 2H), 4.47 – 4.42 (m, 1H), 4.36 (d,  $J$  = 8.7 Hz, 1H), 3.98 (t,  $J$  = 7.4 Hz, 1H), 3.71 – 3.50 (m, 5H), 3.12 (dd,  $J$  = 15.1, 9.6 Hz, 1H), 3.02 (dd,  $J$  = 13.9, 6.0 Hz, 1H), 2.96 (dd,  $J$  = 13.8, 6.4 Hz, 1H), 2.74 – 2.65 (m, 1H), 2.63 – 2.54 (m, 2H), 2.17 – 1.97 (m, 3H), 1.90 – 1.79 (m, 1H), 1.43 (s, 9H), 1.31 (s, 10H), 1.17 (d,  $J$  = 6.4 Hz, 3H). **<sup>13</sup>C NMR** (126 MHz, CDCl<sub>3</sub>):  $\delta$  173.5, 172.4, 171.6, 171.1, 170.7, 170.1, 169.1, 155.5, 154.4, 144.8, 137.9, 130.9, 130.0, 129.0, 128.6, 128.2, 128.0, 127.9, 127.0, 124.3, 80.4, 78.4, 73.8, 72.4, 70.7, 61.5, 57.9, 54.6, 52.3, 50.3, 49.6, 47.9, 37.6, 37.1, 36.7, 29.0, 28.9, 28.4, 25.9, 17.3. **IR** (film in/from DCM, cm<sup>-1</sup>): 3311, 2977, 1672, 1632, 1505, 1447, 1366, 1236, 1208, 1161, 1091, 1048, 1026. **HRMS**: calculated mass for [C<sub>62</sub>H<sub>74</sub>N<sub>6</sub>O<sub>13</sub>+H]<sup>+</sup>: 1111.5387, ESI+ found 1111.5427.

Peptide **8**: white solid. Intermediate **SI-1** was coupled to methanol using the Solution Peptide Synthesis protocol, except instead of performing the reaction in DCM, it was performed in 0.2 M methanol. After work-up, the crude reaction mixture was purified by flash silica gel chromatography with a gradient of 0% to 30% acetone in toluene (**TLC**: 25% acetone in toluene,  $R_f$  = 0.45, visualized by UV, I<sub>2</sub>, and CAM). The resulting material was deprotected using the Standard Fm-ester Deprotection protocol, and upon concentration, was purified with a silica gel column eluted with a gradient of 1% to

4% CH<sub>3</sub>OH in 1% AcOH/DCM (as described in the protocol). A portion of this material was further purified by reverse phase chromatography using a Biotage C18 column eluting with a gradient of 40% CH<sub>3</sub>OH to 100% CH<sub>3</sub>OH in water with 0.1% formic acid.

Peptide **8**: white solid. **TLC**: 4% CH<sub>3</sub>OH, 1% AcOH, DCM ( $R_f$  = 0.32). **<sup>1</sup>H NMR** (500 MHz, CDCl<sub>3</sub>): δ 8.35 (d,  $J$  = 6.9 Hz, 1H), 7.33 (d,  $J$  = 4.3 Hz, 4H), 7.36 – 7.18 (m, 20H), 7.16 (s, 1H), 6.65 (d,  $J$  = 9.2 Hz, 1H), 6.26 (d,  $J$  = 10.4 Hz, 1H), 4.67 (dt,  $J$  = 10.5, 4.0 Hz, 1H), 4.53 (apparent d,  $J$  = 11.3 Hz, 1H), 4.49 – 4.42 (m, 2H), 4.37 – 4.27 (m, 2H), 4.12 (t,  $J$  = 7.8 Hz, 1H), 3.73 – 3.65 (m, 1H), 3.65 – 3.53 (m, 4H), 3.38 (dd,  $J$  = 14.8, 10.1 Hz, 1H), 2.75 (dd,  $J$  = 14.8, 3.7 Hz, 1H), 2.61 (dd,  $J$  = 16.8, 3.5 Hz, 1H), 2.39 (dd,  $J$  = 16.7, 4.4 Hz, 1H), 2.22 – 2.00 (m, 3H), 1.91 – 1.79 (m, 1H), 1.47 (s, 9H), 1.15 (d,  $J$  = 6.4 Hz, 3H). **<sup>13</sup>C NMR** (126 MHz, CDCl<sub>3</sub>): δ 174.0, 172.5, 171.9, 171.3, 170.9, 170.2, 155.4, 144.2, 138.1, 128.9, 128.6, 128.1, 128.1, 128.0, 127.2, 80.3, 73.2, 72.1, 71.2, 62.3, 57.6, 52.5, 50.7, 49.9, 48.0, 38.8, 35.4, 29.0, 28.5, 26.2, 18.1. **IR** (film in/from DCM, cm<sup>-1</sup>): 3322, 2978, 1669, 1632, 1493, 1447, 1367, 1285, 1265, 1231, 1208, 1162, 1080, 1047, 1026. **HRMS**: calculated mass for [C<sub>49</sub>H<sub>57</sub>N<sub>5</sub>O<sub>11</sub>+H]<sup>+</sup>: 892.4127, ESI+ found 892.4189.

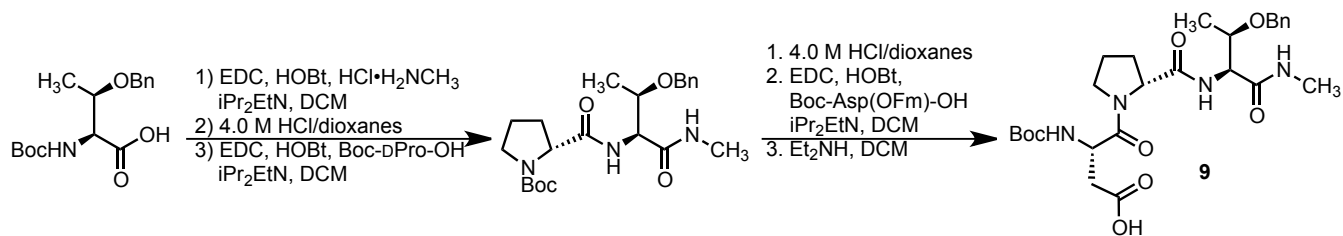

**SI Figure 2.** Synthesis of peptide **9**.

The standard Solution Peptide Coupling protocol was followed using Boc-Thr(Bn)-OH and CH<sub>3</sub>NH<sub>2</sub>·HCl, with iPr<sub>2</sub>EtN (SI Figure 2). After 16 h, the reaction was worked up and then concentrated



to ultimately yield a white powder. The *N*-terminus of Boc-Thr(Bn)-NHCH<sub>3</sub> was deprotected by treating with 4.0 M HCl/dioxanes for ~1.5 h before concentrating the resulting solution under a stream of N<sub>2</sub>. The resulting yellow oil was dissolved in DCM and concentrated further. The material was then coupled to Boc-DPro-OH using the standard Solution Peptide Synthesis protocol with iPr<sub>2</sub>EtN. After running for ~21 h, the reaction was worked up and concentrated to yield a whitish foam.

The resulting material was deprotected using 4.0 M HCl/dioxanes as before for ~2 h. Following HCl removal and concentration, DCM was added and the peptide was coupled to Boc-Asp(OFm)-OH using the standard Solution Peptide Coupling protocol with iPr<sub>2</sub>EtN, running the reaction for ~32 h. Following work-up, the resulting yellowish thick oil was purified by flash column chromatography with a silica gel column packed in 10% acetone in toluene. The material was eluted with a gradient of 10% to 30% acetone in toluene (TLC: 20% acetone in toluene, R<sub>f</sub> = ~0.15, visualized by UV).

The tripeptide solid was subjected to the Standard Fm-ester Deprotection protocol. After a silica gel column, as the protocol describes, the resulting material was further purified on a C18 reverse phase column with a gradient of 40% MeOH in 0.1% (v/v) aqueous formic acid to 100% MeOH. Desired fractions were concentrated.

Peptide **9**: white solid. TLC: 4% CH<sub>3</sub>OH, 1% AcOH, DCM (R<sub>f</sub> = 0.23). NMR chemical shift assignments made by <sup>1</sup>H-<sup>1</sup>H gCOSY spectrum. <sup>1</sup>H NMR (500 MHz, CDCl<sub>3</sub>): δ 7.39 – 7.27 (m, 6H, Ar-*H*'s and NHCH<sub>3</sub>), 7.15 (d, *J* = 8.6 Hz, 1H, *NH*-Thr), 5.55 (d, *J* = 9.3 Hz, 1H, *NH*Boc), 4.85 – 4.77 (m, 1H, α-Asp), 4.54, 4.51 (ABq, *J*<sub>AB</sub> = 11.6 Hz, 2H, -OCH<sub>2</sub>Ph), 4.46 – 4.35 (m, 2H, α/β-Thr), 4.31 (t, *J* = 6.8 Hz, 1H, α-DPro), 3.78 – 3.63 (m, 2H, δ-DPro), 2.85 – 2.76 (m, 4H, -NHCH<sub>3</sub> and β-Asp), 2.69 (dd, *J* = 16.0, 4.4 Hz, 1H, β-Asp), 2.21 – 2.03 (m, 3H, β/γ-DPro), 1.99 – 1.88 (m, 1H, γ-DPro), 1.44 (s, 9H, Boc), 1.15 (d, *J* = 6.3 Hz, 3H, γ-Thr). <sup>13</sup>C NMR (126 MHz, CDCl<sub>3</sub>): δ 174.0, 172.5, 170.5, 170.1, 155.3, 137.9, 128.6, 128.1, 128.0, 80.6, 74.2, 72.3, 61.4, 57.6, 49.3, 47.8, 36.8, 29.0, 28.4, 26.7, 25.6,

17.1. **IR** (film in/from DCM,  $\text{cm}^{-1}$ ): 3284, 3094, 2978, 2878, 1708, 1688, 1630, 1572, 1517, 1452, 1420, 1391, 1366, 1293, 1246, 1206, 1159, 1101, 1048, 1002. **HRMS**: calculated mass for  $[\text{C}_{26}\text{H}_{38}\text{N}_4\text{O}_8+\text{H}]^+$ : 535.2762, ESI+ found 535.2778.

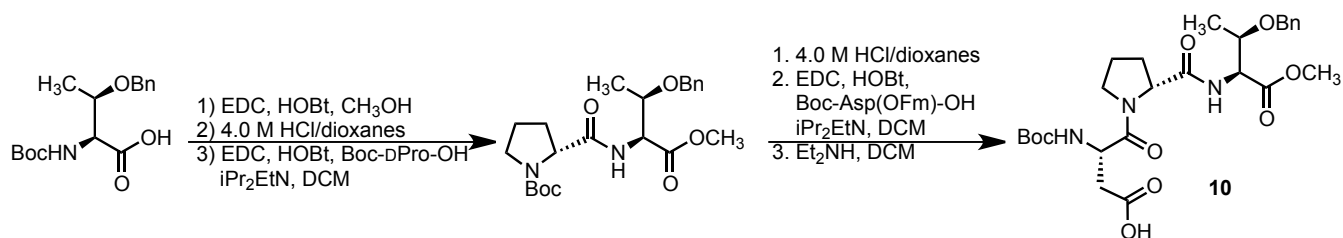

**SI Figure 3.** Synthesis of peptide **10**.

The standard Solution Peptide Coupling protocol was followed using Boc-Thr(Bn)-OH and  $\text{CH}_3\text{OH}$ , which was used as a solvent instead of DCM (SI Figure 3). After 21 h, the crude reaction was concentrated using a rotary evaporator. The resulting material was dissolved in DCM and then worked up as described in the standard protocol. The *N*-terminus of Boc-Thr(Bn)- $\text{OCH}_3$  was deprotected by treating with 4.0 M HCl/dioxanes for ~50 min before concentrating the resulting solution under a stream of  $\text{N}_2$ . The resulting yellow oil was dissolved in DCM and concentrated further by rotary evaporation. The material was then coupled to Boc-DPro-OH using the standard Solution Peptide Coupling protocol with  $i\text{Pr}_2\text{EtN}$ . After running for ~14 h, the reaction was worked up and concentrated.

The resulting off-white solid was deprotected using 4.0 M HCl/dioxanes as before, though for ~1.2 h. Following HCl removal and concentration, the resulting yellowish solid was dissolved in DCM and then coupled to Boc-Asp(OFm)-OH using the standard Solution Peptide Synthesis protocol with  $i\text{Pr}_2\text{EtN}$ , running the reaction for ~20 h. Following work-up, the resulting white solid was purified by flash column chromatography with a silica gel column packed in toluene. The material was eluted with a gradient of 0% to 17% acetone in toluene to yield, upon concentration, a clear, colorless oil, which

turned to a solid upon standing under vacuum (TLC: 20% acetone in toluene ( $R_f = 0.45$ )). The tripeptide solid was subjected to the Standard Fm-ester Deprotection protocol. After a silica gel column, as the protocol describes, the resulting yellow oil was further purified on a C18 reverse phase column with a gradient of 40% MeOH in 0.1% (v/v) aqueous formic acid to 100% MeOH. Desired fractions were concentrated.

Peptide **10**: Clear, colorless, oily looking solid. TLC: 4% CH<sub>3</sub>OH, 1% AcOH in DCM ( $R_f = 0.23$ ), visualized with CAM. Material was determined to contain a mixture of conformational isomers using a TOCSY experiment. <sup>1</sup>H NMR (500 MHz, CDCl<sub>3</sub>):  $\delta$  7.42 (d,  $J = 9.5$  Hz, 1H), 7.38 – 7.32 (m, 2H), 7.32 – 7.23 (m, 3H), 5.72 (d,  $J = 9.2$  Hz, 1H), 4.84 (td,  $J = 8.9, 4.2$  Hz, 1H), 4.79 – 4.67 (m, 1H), 4.66 – 4.53 (m, 2H), 4.39 (d,  $J = 12.1$  Hz, 1H), 4.09 (qd,  $J = 6.3, 2.3$  Hz, 1H), 3.73 – 3.65 (m, 2H), 3.62 (s, 3H), 2.93 (dd,  $J = 16.4, 8.4$  Hz, 1H), 2.75 (dd,  $J = 16.3, 4.1$  Hz, 1H), 2.38 – 2.28 (m, 1H), 2.18 – 2.06 (m, 1H), 2.06 – 1.93 (m, 2H), 1.43 (s, 9H), 1.21 (d,  $J = 6.3$  Hz, 3H). Minor conformer peaks were also observed: 7.00 (d,  $J = 9.3$  Hz), 5.42 (d,  $J = 9.4$  Hz), 5.01 (bs), 4.22 – 4.14 (m), 3.64 (s), 2.28 – 2.20 (m). <sup>13</sup>C NMR (126 MHz, CDCl<sub>3</sub>):  $\delta$  173.5, 171.6, 171.2, 170.9, 155.4, 137.9, 128.5, 127.9, 127.9, 80.5, 73.9, 70.7, 60.1, 56.8, 52.4, 49.3, 47.2, 37.0, 28.4, 27.3, 25.0, 16.3. IR (film in/from DCM, cm<sup>-1</sup>): 3307, 2978, 1710, 1685, 1640, 1518, 1437, 1367, 1268, 1249, 1207, 1159, 1084, 1048, 1026, 1000. HRMS: calculated mass for [C<sub>26</sub>H<sub>37</sub>N<sub>3</sub>O<sub>9</sub>+H]<sup>+</sup>: 536.2603, ESI+ found 536.2643.

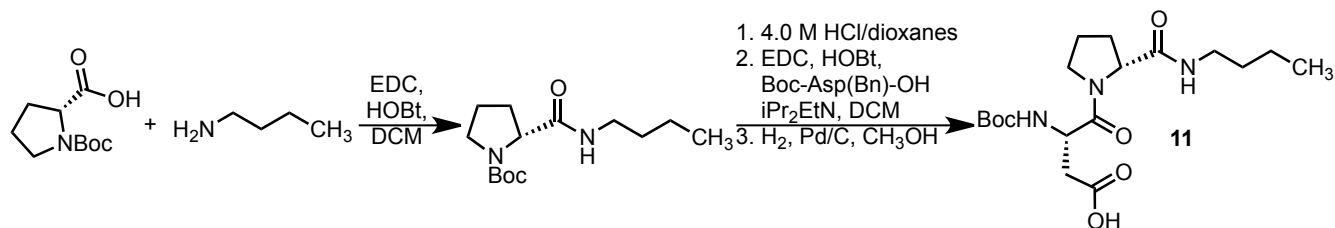

SI Figure 4. Synthesis of peptide **11**.

Boc-DPro-OH was coupled to *n*-butyl amine using the Solution Peptide Synthesis Protocol (SI Figure 4). Following work-up, the Boc group was removed by treatment with a 4.0 M solution of HCl in dioxanes. After 30 min, the solution was concentrated, dissolved in DCM, and then concentrated again. To the resulting crude oil was added coupling reagents, *i*Pr<sub>2</sub>EtN, and Boc-Asp(Bn)-OH, following the Solution Peptide Synthesis Protocol. After work-up, the material was dissolved in CH<sub>3</sub>OH and purified using a Biotage C18 column with a gradient of 20% to 100% CH<sub>3</sub>CN in water. Desired fractions were concentrated and the resulting material was deprotected following the Standard Hydrogenolysis Protocol. Finally, the resulting material was purified on a Biotage C18 column running a gradient of 20% to 100% CH<sub>3</sub>CN in water with 0.1% formic acid. Desired fractions were collected and concentrated.

Peptide **11**: white solid. Compound exists as a putative mixture of conformational isomers. **TLC**: 4% CH<sub>3</sub>OH, 1% AcOH in DCM (*R<sub>f</sub>* = 0.18), visualized with I<sub>2</sub>/silica. **<sup>1</sup>H NMR** (500 MHz, CDCl<sub>3</sub>): δ 6.96 – 6.85 (m, 1H), 5.65 – 5.53 (m, 1H), 4.65 (apparent q, *J* = 6.9 Hz, 1H), 4.53 (d, *J* = 5.4 Hz, 1H), 3.90 – 3.81 (m, 1H), 3.70 (q, *J* = 7.9 Hz, 1H), 3.23 (dt, *J* = 13.2, 8.0 Hz, 1H), 3.18 – 3.07 (m, 1H), 2.85 (dd, *J* = 16.4, 7.3 Hz, 1H), 2.69 (dd, *J* = 16.4, 5.8 Hz, 1H), 2.31 – 2.20 (m, 1H), 2.08 – 1.92 (m, 3H), 1.53 – 1.36 (m, 11H), 1.30 (q, *J* = 7.4 Hz, 2H), 0.90 (t, *J* = 7.3 Hz, 3H). Minor conformer peaks also observed at 5.49 (d, *J* = 9.8 Hz), 4.73 – 4.69 (m), 3.59 (d, *J* = 8.3 Hz), 2.18 – 2.08 (m). **<sup>13</sup>C NMR** (126 MHz, CDCl<sub>3</sub>): δ 173.0, 171.2, 171.0, 155.8, 80.8, 61.0, 49.4, 47.7, 39.8, 39.5, 36.4, 31.6, 28.9, 28.4, 24.7, 20.2, 13.9. **IR** (film in/from DCM, cm<sup>-1</sup>): 3341, 2965, 2935, 2875, 1713, 1691, 1547, 1506, 1418, 1408, 1393, 1365, 1348, 1327, 1269, 1255, 1181, 1158, 1077, 1046, 1015. **HRMS**: calculated mass for [C<sub>18</sub>H<sub>31</sub>N<sub>3</sub>O<sub>6</sub>+H]<sup>+</sup>: 386.2286, ESI+ found 386.2314.

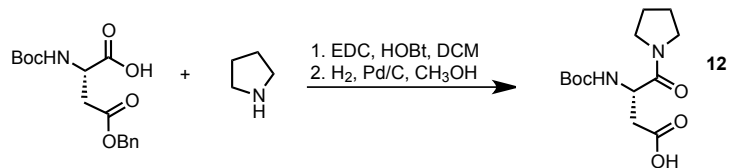

**SI Figure 5.** Synthesis of peptide **12**.

The Solution Peptide Synthesis protocol was used to couple Boc-Asp(Bn)-OH to pyrrolidine (SI Figure 5). Following work-up, the resulting oil was purified by flash silica gel chromatography, eluting with a gradient of 15% to 60% EtOAc in hexanes. Desired fractions were concentrated to yield a clear, colorless oil (**TLC**: 60% EtOAc in hexanes ( $R_f = 0.40$ )). Much of the resulting material was deprotected using the Standard Hydrogenolysis Protocol, reacting for ~6.5 h. Material was further purified by elution through a Biotage C18 column with a gradient of 20% to 100% CH<sub>3</sub>OH in aqueous 0.1% formic acid.

Peptide **12**: white solid. **TLC**: 4% CH<sub>3</sub>OH, 1% AcOH in DCM ( $R_f = 0.23$ ), visualized with I<sub>2</sub>/silica. **<sup>1</sup>H NMR** (500 MHz, CDCl<sub>3</sub>):  $\delta$  5.64 (d,  $J = 9.3$  Hz, 1H), 4.87 – 4.77 (m, 1H), 3.72 – 3.57 (m, 2H), 3.47 (td,  $J = 6.9, 1.6$  Hz, 2H), 2.82 (dd,  $J = 15.9, 6.6$  Hz, 1H), 2.71 (dd,  $J = 15.9, 5.1$  Hz, 1H), 2.02 – 1.93 (m, 2H), 1.93 – 1.81 (m, 2H), 1.44 (s, 9H). **<sup>13</sup>C NMR** (126 MHz, CDCl<sub>3</sub>):  $\delta$  173.1, 169.9, 155.4, 80.5, 49.0, 47.0, 46.6, 37.8, 28.5, 26.2, 24.3. **IR** (film in/from DCM, cm<sup>-1</sup>): 3308, 2977, 1706, 1609, 1515, 1454, 1392, 1367, 1342, 1250, 1160, 1046, 1023, 1001. **HRMS**: calculated mass for [C<sub>13</sub>H<sub>22</sub>N<sub>2</sub>O<sub>5</sub>+H]<sup>+</sup>: 287.1601, ESI+ found 287.1596.

## NMR experiments and modeling of peptide 1

### NMR experiments

NMR spectra were acquired on a Varian Inova 500 MHz spectrometer running VnmrJ 2.2D with pulse sequences provided by Varian. A combination of 1D  $^1\text{H}$  NMR with 2D gCOSY, TOCSY, and ROESY experiments (provided by Varian) were used to assign proton chemical shifts. T1 relaxation times were measured by performing an inversion-recovery experiment (INVREC, provided by Varian), acquiring  $^1\text{H}$  NMR spectra with different relaxation delay times (d1) ranging from (0.0625 s to 30 s). The intensity ( $M_z$ ) of each peak was measured as a function of time ( $t$ ) and fit to Equation 1 using Prism Graphing Software. Measurements are shown in SI Table 1. All reported NMR data were collected on 20 mM samples of peptide in  $\text{CDCl}_3$ .

$$M_z = M_{01} + 2M_{02}e^{-t/T1} \quad (1)$$

**SI Table 1.** T1 relaxation values determined for protons within peptide 1.

| Entry | Signal               | T1 (s) | Entry | Signal               | T1 (s) |
|-------|----------------------|--------|-------|----------------------|--------|
| 1     | Boc(tBu)             | 0.395  | 18    | Aryl peaks           | 0.854  |
| 2     | NH-Asp               | 0.576  | 19    | NH-Asn(Trt)          | 0.392  |
| 3     | $\alpha$ -Asp        | 0.496  | 20    | $\alpha$ -Asn(Trt)   | 0.590  |
| 4     | $\beta$ -Asp         | 0.337  | 21    | $\beta$ -Asn(Trt)    | 0.279  |
| 5     | $\beta$ -Asp         | 0.310  | 22    | $\beta$ -Asn(Trt)    | 0.285  |
| 6     | $\alpha$ -DPro       | 0.406  | 23    | $\delta$ -Asn(Trt)   | 0.319  |
| 7     | $\beta/\gamma$ -DPro | 0.441  | 24    | NH-Tyr               | 0.434  |
| 8     | $\beta$ -DPro        | 0.419  | 25    | $\alpha$ -Tyr(tBu)   | 0.713  |
| 9     | $\gamma$ -DPro       | 0.408  | 26    | $\beta$ -Tyr(tBu)    | 0.337  |
| 10    | $\delta$ -DPro       | 0.341  | 27    | $\beta$ -Tyr(tBu)    | 0.341  |
| 11    | $\delta$ -DPro       | 0.440  | 28    | $\delta$ -Tyr(tBu)   | 0.885  |
| 12    | NH-Thr(Bn)           | 0.350  | 29    | $\epsilon$ -Tyr(tBu) | 1.068  |
| 13    | $\alpha$ -Thr(Bn)    | 0.798  | 30    | Tyr(tBu)             | 0.796  |
| 14    | $\beta$ -Thr(Bn)     | 0.669  | 31    | NH-Gly               | 0.593  |
| 15    | $\gamma$ -Thr(Bn)    | 0.396  | 32    | $\alpha$ -Gly        | 0.510  |
| 16    | $\delta$ -Thr(Bn)    | 0.556  | 33    | $\alpha$ -Gly        | 0.494  |
| 17    | $\delta$ -Thr(Bn)    | 0.550  | 34    | $\text{OCH}_3$       | 0.884  |

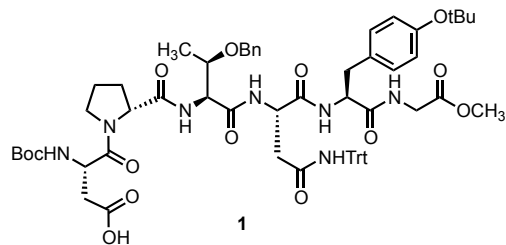

ROESY data was acquired with a 200 ms mixing time; spectral width of 5102.4 Hz in both F1 and F2; 765 points in t2 and 512 points in t1; 128 scans; relaxation delay (d1) of 3.06 s (three times the highest T1 relaxation of 1.07 s less acquisition time of 0.15 s); and at 25 °C. Data were processed using MestReNova version 8.1.1-11591 using zerofilling to bring the spectral size to 1024, 1024; automatic phasing with manual adjustments; apodization with a Gaussian function; and automatic baseline correction with a polynomial fit.

<sup>1</sup>H NMR (500 MHz, CDCl<sub>3</sub>, 25 °C) δ 7.61 – 7.53 (m, 2H, NH-Asn and Asn(NH)), 7.31 – 7.14 (m, 20H, Trt and Bn aryl peaks), 7.14 – 7.09 (m, 1H, NH-Gly), 7.07 (d, *J* = 8.4 Hz, 2H, δ-Tyr), 6.95 (d, *J* = 8.2 Hz, 1H, NH-Tyr), 6.89 (d, *J* = 8.4 Hz, 1H, ε-Tyr), 6.69 (d, *J* = 9.1 Hz, 1H, NH-Thr), 6.35 (d, *J* = 10.4 Hz, 1H, NH-Asp), 4.80 (dt, *J* = 10.2, 5.6 Hz, 1H, α-Asp), 4.67 (ddd, *J* = 11.2, 8.2, 5.3 Hz, 1H, α-Asn), 4.59 – 4.52 (m, 1H, α-Tyr), 4.49, 4.38 (ABq, *J*<sub>AB</sub> = 11.4 Hz, 2H, Thr(CH<sub>2</sub>Ph), 4.49 – 4.43 (m, 1H, β-Thr), 4.33 – 4.27 (m, 1H, α-Thr), 4.12 (t, *J* = 7.3 Hz, 1H, α-DPro), 3.77 (dd, *J* = 17.6, 6.8 Hz, 1H, α-Gly), 3.73 – 3.61 (m, 2H, δ-DPro, individual protons assigned in F2 of TOCSY spectrum to be 3.69 and 3.64), 3.58 (s, 3H, OCH<sub>3</sub>), 3.42 (dd, *J* = 15.9, 11.2 Hz, 1H, β-Asn), 3.29 (dd, *J* = 14.2, 6.1 Hz, 1H, β-Tyr), 2.99 (dd, *J* = 14.2, 5.6 Hz, 1H, β-Tyr), 2.84 (dd, *J* = 17.6, 4.9 Hz, 1H, α-Gly), 2.77 (dd, *J* = 16.5, 6.1 Hz, 1H, β-Asp), 2.57 (dd, *J* = 16.4, 4.0 Hz, 1H, β-Asp), 2.47 (dd, *J* = 15.8, 5.3 Hz, 1H, β-Asn), 2.23 – 2.11 (m, 2H, β/γ-DPro), 2.11 – 1.98 (m, 1H, β-DPro), 1.95 – 1.82 (m, 1H, γ-DPro), 1.47 (s, 9H, Boc-tBu), 1.32 (s, 9H, Tyr(tBu)), 1.19 (d, *J* = 6.3 Hz, 3H, γ-Thr).

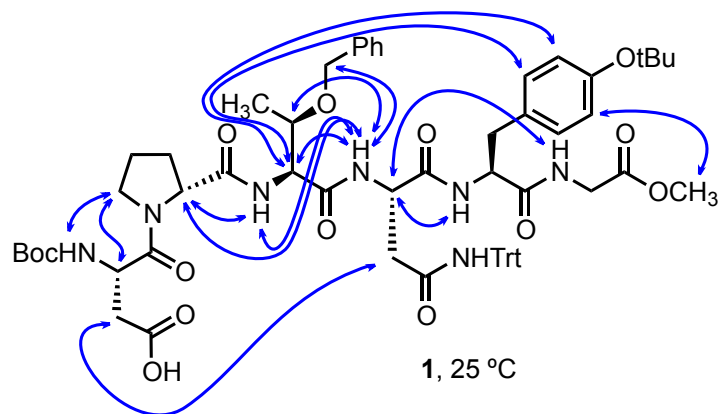

**SI Figure 6.** Unabridged ROESY correlation map of peptide **1** in CDCl<sub>3</sub> at 25 °C. The crosspeaks assigned to both NH-Asn and Asn(NH) were difficult to resolve; thus, ROESY assignment of crosspeaks were made by analogy to the those observed with peptide **7**.

Modeling of peptide **1**.<sup>2</sup> Distances between protons diagramed in SI Figure 6 were estimated by manually integrating the peak volumes (generally the average of both peaks across the diagonal) and fitting to Equation 2, where  $r_{ij}$  (the distance between H<sub>i</sub> and H<sub>j</sub>) is a function of a reference distance ( $r_{ref}$ ), the reference crosspeak volume ( $v_{ref}$ ), and the crosspeak volume between H<sub>i</sub> and H<sub>j</sub> ( $v_{ij}$ ).

$$r_{ij} = r_{ref} \sqrt[3]{v_{ref}/v_{ij}} \quad (2)$$

Three different sets of crosspeaks and distance restraints were considered for internal distance calibration. While two sets of methylene peaks assigned to  $\alpha$ -Gly and  $\beta$ -Asn are resolved well enough for clear integration, the relative volumes of these sets differ substantially ( $v_{Asn}/v_{Gly} = 1.8$ ) and we were not comfortable referencing to these distances alone if possible. We established that only a limited number of conformations were accessible given the ROESY data of the  $\alpha$ -Asp and  $\delta$ -DPro and the stereochemical configuration of the *N*-terminal Boc-Asp. These data led us to estimate the approximate distances between the  $\alpha$ -Asp and  $\delta$ -DPro protons that satisfied the possible conformations. We

<sup>2</sup> The basic approach and equations employed are described in: (a) Wüthrich, K. *NMR of Proteins and Nucleic Acids* John Wiley & Sons, Inc.: New York, 1986. (b) Cavanagh, J.; Fairbrother, W. J.; Palmer, A. G., III; Rance, M.; Skelton, N. J. *Protein NMR Spectroscopy: Principles and Practice*, 2nd ed., Inc.: Burlington, 2007.



reasoned that the distance between H $\alpha$ -Asp and H $\delta$ 2-DPro were in the vicinity of 2.2 or 2.3 Å (defined as Ref1 and Ref2, respectively), which were also in line with those determined from another similar peptide structure that we had observed,<sup>3</sup> and we used these values in our calculations.<sup>4</sup> Importantly, these two reference values provided some agreement with the distances derived from the  $\alpha$ -Gly and  $\beta$ -Asn crosspeaks. Specifically, the reference distance between methylene protons would be 1.8 Å. With Ref1, the calculated distances of  $\alpha$ -Gly and  $\beta$ -Asn are 1.9 and 1.7 Å; and with Ref2 these calculated distances round to 2.0 and 1.8 Å, respectively.

The distance estimates were then assigned to bins, which were used as restraints (SI Table 2). The bins were defined according to the ROESY crosspeak intensity such that the strongest peaks were assigned to the narrowest range of distances as follows: very strong (1.8 to 2.5 Å), strong (1.8 to 3.0 Å), medium (1.8 to 3.5 Å), and weak (1.8 to 4.5 Å). In the case of some H-H correlations, while crosspeaks were observed, the corresponding distances were not calculated due to inconclusive integrations (*i.e.*, there was overlap with neighboring peaks or excessive noise). In such cases, the peaks were assigned to the largest bin (1.8 to 4.5 Å).

The distance restraints were then input into the Crystallography & NMR System (CNS)<sup>5</sup> modeling program, version 1.21. The amino acid monomer topology/parameter files were built manually (except Gly) using the distances and angles from existing crystal structures in combination with the provided

---

<sup>3</sup> Blank, J. T.; Miller, S. J. *Biopolymers* **2006**, *84*, 38-47. See Cambridge Structural Databank, entry WEDBUD.

<sup>4</sup> The calculated distance was derived from integration of the crosspeak where H $\delta$ 2-DPro could be resolved from H $\delta$ 1-DPro in F2.

<sup>5</sup> (a) Brunger, A. T.; Adams, P. D.; Clore, G. M.; Delano, W. L.; Gros, P. Grosse-Kunstleve, R. W.; Jiang, J.-S.; Kuszewski, J.; Nilges, N.; Pannu, N. S.; Read, R. J.; Rice, L. M.; Simonson, T.; Warren, G. L. *Acta Cryst.* **1998**, *D54*, 905-921. (b) Brunger, A. T. *Nature Protocols* **2007**, *2*, 2728-2733.

amino acid topology/parameter files, where appropriate.<sup>6</sup> For each reference, 1000 structures were generated during the annealing, ten of which were accepted for further analysis.

---

<sup>6</sup> Some of the amino acid monomer topology/parameter files were built with Dr. Michael Giuliano and Nadia Abascal.

**SI Table 2.** Calculated distances between protons within peptide **1**, and the associated bin, derived from ROESY crosspeaks with different reference distances.

| Entry | Peak 1                 | Peak 2                 | Ref1         | Ref1 bin    | Ref2         | Ref2 bin    |
|-------|------------------------|------------------------|--------------|-------------|--------------|-------------|
|       |                        |                        | distance (Å) |             | distance (Å) |             |
| 1     | NH-Asp                 | H $\delta$ 1-DPro      | 3.5          | weak        | 3.7          | weak        |
| 2     | NH-Asp                 | H $\delta$ 2-DPro      | 3.5          | weak        | 3.7          | weak        |
| 3     | H $\alpha$ -Asp        | H $\delta$ 1-DPro      | 2.5          | very strong | 2.6          | strong      |
| 4     | H $\alpha$ -Asp        | H $\delta$ 2-DPro      | 2.2          | very strong | 2.3          | very strong |
| 5     | H $\beta$ -Asp         | H $\beta$ -Asn(Trt)    | 3.0          | strong      | 3.1          | medium      |
| 6     | H $\alpha$ -DPro       | NH-Thr(Bn)             | 2.1          | very strong | 2.2          | very strong |
| 7     | H $\alpha$ -DPro       | NH-Asn(Trt)            | 3.6          | weak        | 3.7          | weak        |
| 8     | NH-Thr(Bn)             | NH-Asn(Trt)            | 2.6          | strong      | 2.7          | strong      |
| 9     | H $\alpha$ -Thr(Bn)    | NH-Asn(Trt)            | 3.0          | strong      | 3.1          | medium      |
| 10    | H $\alpha$ -Thr(Bn)    | H $\delta$ -Tyr(tBu)   | 3.7          | weak        | 3.9          | weak        |
| 11    | H $\alpha$ -Thr(Bn)    | H $\epsilon$ -Tyr(tBu) | 3.6          | weak        | 3.7          | weak        |
| 12    | H $\beta$ -Thr(Bn)     | NH-Asn(Trt)            | ND           | weak        | ND           | weak        |
| 13    | H $\delta$ -Thr(Bn)    | NH-Asn(Trt)            | ND           | weak        | ND           | weak        |
| 14    | H $\alpha$ -Asn        | NH-Tyr(tBu)            | 2.2          | very strong | 2.5          | very strong |
| 15    | H $\alpha$ -Asn(Trt)   | NH-Gly                 | ND           | weak        | ND           | weak        |
| 16    | H $\epsilon$ -Tyr(tBu) | COOCH <sub>3</sub>     | ND           | weak        | ND           | weak        |

## NMR experiments with peptide 7

NMR spectra were acquired on a Varian Inova 500 MHz spectrometer running VnmrJ 2.2D with pulse sequences provided by Varian. Peak assignments for peptide 7 acquired at  $-20\text{ }^{\circ}\text{C}$  were based upon 2D gCOSY, TOCSY, and ROESY data.

ROESY data was acquired with a 200 ms mixing time; spectral width of 5102.4 Hz in both F1 and F2; 765 points in t2 and 512 points in t1; 32 scans; relaxation delay (d1) of 3.328 s and at  $-20\text{ }^{\circ}\text{C}$ . Data were processed using MestReNova version 8.1.1-11591 using zerofilling to bring the spectral size to 1024, 1024; automatic phasing with manual adjustments; apodization with a Gaussian function; and automatic baseline correction with a polynomial fit.

**$^1\text{H}$  NMR** (500 MHz,  $\text{CDCl}_3$ ,  $-20\text{ }^{\circ}\text{C}$ ):  $\delta$  7.74 (d,  $J = 8.0$  Hz, 1H, NH-Asn), 7.70 (s, 1H, Asn(NHTrt)), 7.56 (d,  $J = 7.3$  Hz, 1H, NH-Tyr), 7.41 – 7.19 (m, 20H, Trt and Bn aryl peaks), 7.18 – 7.03 (m, 1H, NH-Thr), 6.98 (d,  $J = 8.4$  Hz, 2H,  $\delta$ -Tyr), 6.90 (d,  $J = 8.4$  Hz, 1H,  $\epsilon$ -Tyr), 6.67 (d,  $J = 8.2$  Hz, 1H, NH-Asp), 4.93 – 4.84 (m, 1H,  $\alpha$ -Asn), 4.81 (ddd,  $J = 10.9, 7.1, 4.0$  Hz, 1H,  $\alpha$ -Asp), 4.57 (apparent q,  $J = 6.7$  Hz, 1H,  $\alpha$ -Tyr), 4.51 – 4.38 (m, 3H,  $\beta$ -Thr and benzylic  $\text{CH}_2$ ), 4.35 (d,  $J = 9.6$  Hz, 1H,  $\alpha$ -Thr), 4.03 (t,  $J = 7.5$  Hz, 1H,  $\alpha$ -DPro), 3.72 – 3.51 (m, 5H,  $\delta$ -DPro and  $\text{OCH}_3$ , one  $\delta$ -DPro proton is resolved/assigned in F2 of TOCSY spectrum to be 3.65), 3.19 (dd,  $J = 15.6, 10.1$  Hz, 1H,  $\beta$ -Asn), 3.04 – 2.88 (m, 2H,  $\beta$ -Tyr), 2.77 (dd,  $J = 16.6, 7.4$  Hz, 1H,  $\beta$ -Asp), 2.66 – 2.48 (m, 2H,  $\beta$ -Asp and  $\beta$ -Asn, assigned in F2 of TOCSY spectrum to be 2.59 and 2.56, respectively), 2.17 – 2.07 (m, 2H,  $\beta/\gamma$ -DPro), 2.05 – 1.94 (m, 1H,  $\beta$ -DPro), 1.89 – 1.74 (m, 1H,  $\gamma$ -DPro), 1.44 (s, 9H, Boc-tBu), 1.31 (s, 9H, Tyr(tBu)), 1.18 (d,  $J = 6.3$  Hz, 3H,  $\gamma$ -Thr).

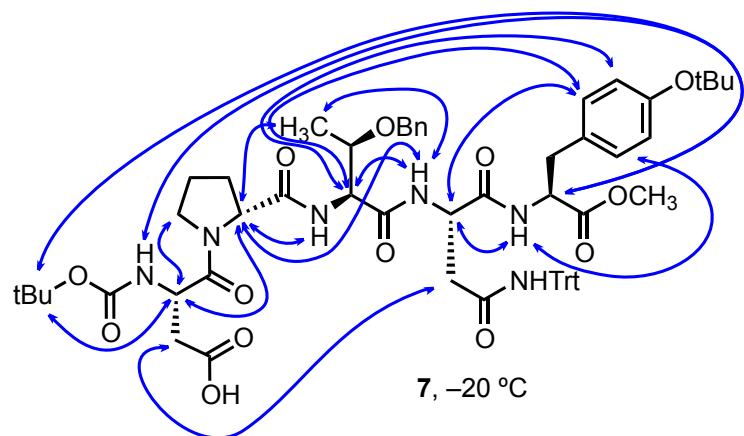

**SI Figure 7.** Unabridged ROESY correlation map of peptide **7** in CDCl<sub>3</sub> at -20 °C.

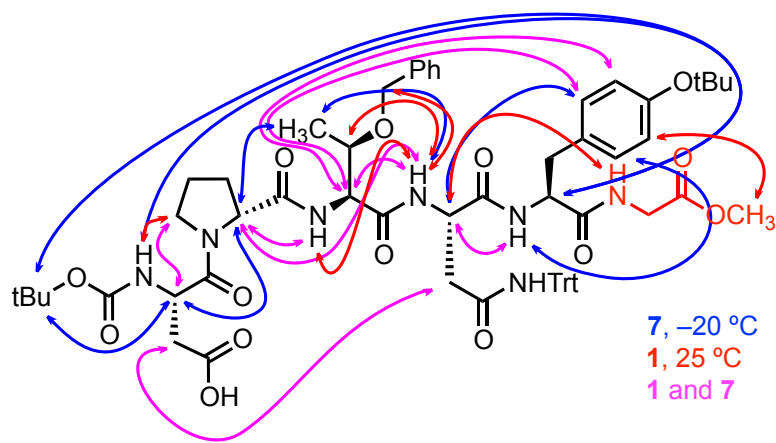

**SI Figure 8.** Composite map of ROESY correlations found in peptide **7** at -20 °C (blue), **1** at 25 °C. (red), and those shared by both **1** and **7** (purple).

## Experiments with farnesyl methyl ether<sup>7</sup> (13)

### Preliminary experiments

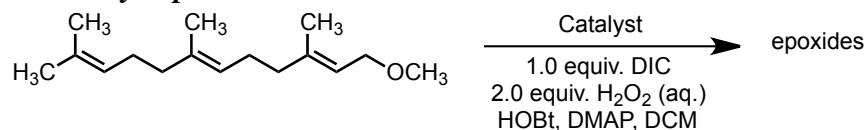

| Entry          | Catalyst                                                                           | GC Trace                                                                           | Selectivity (10,11-:6,7-) |
|----------------|------------------------------------------------------------------------------------|------------------------------------------------------------------------------------|---------------------------|
| 1 <sup>a</sup> | 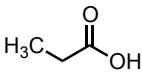  |   | 1.3 : 1.0                 |
| 2 <sup>b</sup> |  |  | 1.0 : 1.0                 |

**SI Figure 9.** Comparison of selectivity derived from acid catalysts with farnesyl methyl ether and one theoretical equivalent of oxidant (controlled by DIC stoichiometry) as determined by GC (acquisition method is the same as for farnesol). <sup>a</sup>Performed with 0.3 equiv propionic acid, run for approximately 2 h at room temperature. <sup>b</sup>Performed at 4 °C with 0.1 equiv peptide, run for 5 h.

Peptide **17** was prepared analogously to peptide **1**. Fmoc-Ile-OH was used in the solid-phase peptide synthesis to be present in the *i*+2 position. Following the Fm-ester deprotection and purification by silica gel chromatography (see the Standard Fm-ester deprotection protocol, SI-5), peptide **17** was used without further purification and used in most reaction studies. This batch of material was found to

<sup>7</sup> Schwartz, M. A.; Dunn, T. J. *J. Am. Chem. Soc.* **1972**, *94*, 4205-4211.

contain an impurity and was further purified by reversed phase chromatography for characterization (<sup>1</sup>H NMR spectrum included). When tested with **13** and **18**, this further purified batch of **17** did not indicate any appreciable change in performance, as determined by GC of the crude reactions.

Peptide **17**: white solid. <sup>1</sup>H NMR (500 MHz, CDCl<sub>3</sub>): δ 8.10 – 7.73 (m, 2H), 7.31 – 7.11 (m, 16H), 6.97 (d, J = 8.0 Hz, 2H), 6.85 (d, J = 8.3 Hz, 2H), 6.55 (bs, 1H), 5.91 (bs, 1H), 4.92 – 4.84 (m, 1H), 4.51 (apparent t, J = 9.8 Hz, 1H), 4.36 (bs, 1H), 4.22 (dd, J = 9.0, 3.7 Hz, 1H), 4.06 (apparent t, J = 7.2 Hz, 1H), 3.70 – 3.57 (m, 6H), 3.52 (apparent t, J = 8.8 Hz, 1H), 3.43 – 3.26 (m, 1H), 3.10 (dd, J = 14.0, 6.4 Hz, 1H), 3.05 – 2.94 (m, 2H), 2.66 (dd, J = 16.8, 3.9 Hz, 1H), 2.33 (d, J = 14.1 Hz, 1H), 2.07 – 1.74 (m, 4H), 1.52 – 1.44 (m, 10H), 1.31 (s, 9H), 1.07 (bs, 1H), 0.83 – 0.78 (m, 4H), 0.75 (d, J = 6.8 Hz, 3H). A TOCSY spectrum was used to assist the assignment of proton integer values given the peak broadening.





Epoxide **15**: (major product, isolated as an enriched mixture with epoxide **14**): **TLC**: 30% Et<sub>2</sub>O in hexanes ( $R_f=0.43$ ), visualized with I<sub>2</sub>/silica. **<sup>1</sup>H NMR** (600 MHz, CDCl<sub>3</sub>):  $\delta$  5.39 (tdt,  $J = 6.8, 2.8, 1.3$  Hz, 1H), 5.07 (ddp,  $J = 8.6, 5.8, 1.5$  Hz, 1H), 3.95 – 3.91 (m, 2H), 3.33 (s, 2H), 2.71 (t,  $J = 6.2$  Hz, 1H), 2.24 – 2.01 (m, 4H), 1.73 – 1.57 (m, 12H), 1.41 (ddd,  $J = 13.6, 9.5, 7.1$  Hz, 1H), 1.25 (s, 3H). **<sup>13</sup>C NMR** (151 MHz, CDCl<sub>3</sub>):  $\delta$  139.6, 132.0, 123.8, 121.3, 69.0, 63.4, 61.0, 58.1, 38.9, 36.3, 27.2, 25.9, 24.0, 17.8, 16.6, 16.6.

Epoxide **14** (minor product of isolated mixture with epoxide **15**, partially reported): **<sup>1</sup>H NMR** (600 MHz, CDCl<sub>3</sub>):  $\delta$  5.34 (tdt,  $J = 6.7, 2.6, 1.3$  Hz, 1H), 5.18 – 5.13 (m, 1H), 3.32 (s, 3H), 1.30 (s, 3H), 1.26 (s, 3H).

## Experiments with difarnesyl ether (18)

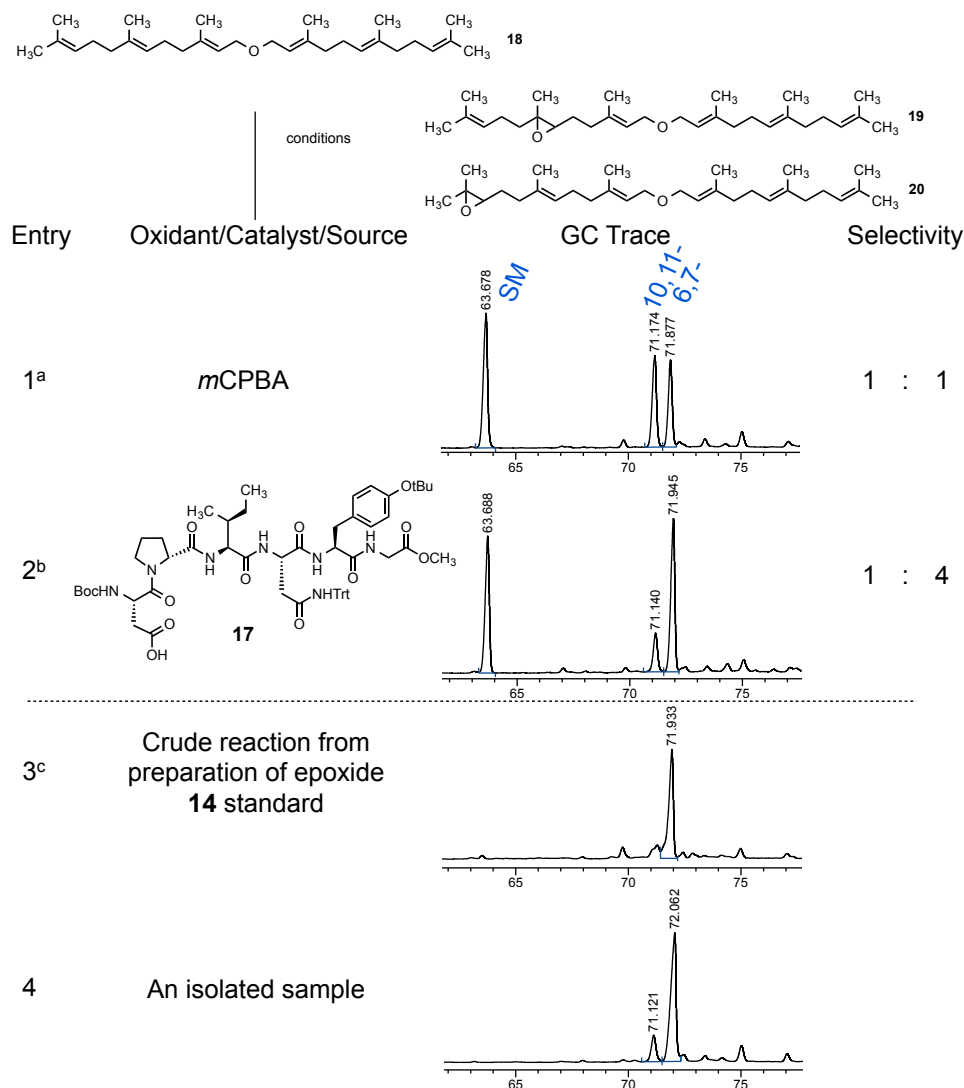

**SI Figure 11.** Comparison of selectivity derived from oxidants/catalysts with difarnesyl ether<sup>10</sup> as determined by GC (275 °C injector and detector; 1.5 mL/min He flow through column; 60 °C initial oven temp, ramp at 10 °C/min to 200 °C, hold for 1 min, ramp at 1 °C/min to 260 °C with 3 min hold at 237 °C and 2 min hold at 238 °C; final hold at 260 °C for 3 min; 84 min total). Selectivities are reported as the ratio of area of **19** to that of the next most intense peak, presumed to be **20**. <sup>a</sup>*m*CPBA (1 equiv), NaHPO<sub>4</sub> (2 equiv), DCM, H<sub>2</sub>O, room temp, 4 h; <sup>b</sup>**17** (0.1 equiv), HOBt (0.1 equiv), DMAP (0.1 equiv), 1.5 equiv DIC, 2.0 equiv H<sub>2</sub>O<sub>2</sub>, DCM, -20 °C, 48 h; <sup>c</sup>Crude GC of reaction preparing 6,7-epoxydifarnesyl ether standard: 6,7-epoxyfarnesol (90%),<sup>11</sup> NaH, and farnesyl bromide.

<sup>10</sup> Prashad, M.; Kathawala, F. G.; Scallen, T. J. *Med. Chem.* **1993**, *36*, 1501-1504.

<sup>11</sup> Lichtor, P. A.; Miller, S. J. *Nature Chem.* **2012**, *4*, 990-995.

Reactions of difarnesyl ether (**18**) and peptide **17** were performed as described for the screening of truncated catalyst analogs (see SI-4), except DCM was used as a reaction solvent and either 1.1 or 1.5 equiv DIC (higher equiv results in slightly higher conversion of starting material) with 2.0 equiv H<sub>2</sub>O<sub>2</sub> were used. Following work-up and GC analysis, the remaining organics, along with two additional hexanes extracts of the aqueous material, were combined, concentrated. The resulting material was loaded onto a silica gel column, eluting with a gradient of 0% to 30% Et<sub>2</sub>O in hexanes. The monoepoxide products were found to be somewhat unstable to silica gel, as was evident from a two-dimensional TLC of a crude reaction run with *m*CPBA, where products were allowed to stand for 25 min on the TLC plate following the first elution, and then separated in the perpendicular direction. Additionally, trace amounts of unidentified products were sometimes isolated along with mixtures of **19** and **20**. The ratio of epoxide products following isolation was >3:1 (**19:20**), as determined by NMR. Furthermore, we note that the estimation of the crude ratios by both NMR and GC is similar to that observed in the isolated material by NMR (~3:1; See page S-51).

We note further that epoxide ratios from the crude reactions with **18** are challenging to ascertain. As in previous reactions, the site selectivity was estimated by comparing the GC spectra of the crude reactions and measuring the ratio of the most intense peak areas eluting at the retention time characteristic of the monoepoxides. We confirmed the GC assignment of the major product (**19**) by synthesizing it independently (SI Figure 11, entry 3). We presume that the other major peak in the GC to be **20** based upon its analogy to GC spectra/studies with **13** in addition to the observation that epoxide **19** is isolated as a minor product along with **20**. We note, however, that reinjection of the isolated mixture of **19** and **20** results in the slightly different epoxide ratio (SI Figure 11, entry 4) and the appearance of other neighboring peaks that seem to have increased intensity relative to the main products (compared to the crude reaction), the cause of which may be the instability of products under

the high temperature conditions of this GC assay. Nonetheless, the GC trace of the crude reactions is illustrative of the comparative selectivities observed with peptide-based catalysts **1** and **17**, and mCPBA (entry 1) and **17** (entry 2); moreover, the selectivity estimated from these traces is corroborated by the  $^1\text{H}$  NMR of the crude reactions where we estimate a ratio of what attribute to all “6,7-” and “10,11-” epoxides (that is, integrating over the di- and potentially higher epoxidized products as well; see page S-53). Furthermore, we note that the estimation of the crude ratios by both NMR and GC is similar to that observed in the isolated material by NMR (~3:1).

Epoxide **19**: (major product, isolated as an enriched mixture with epoxide **20**): **TLC**: 20% Et<sub>2</sub>O in hexanes ( $R_f=0.45$ ), visualized with I<sub>2</sub>/silica.  **$^1\text{H}$  NMR** (500 MHz, CDCl<sub>3</sub>):  $\delta$  5.41 (tdd,  $J = 6.8, 2.8, 1.4$  Hz, 1H), 5.37 (tdd,  $J = 6.8, 2.6, 1.3$  Hz, 1H), 5.15 – 5.04 (m, 3H), 3.98 (d,  $J = 6.7$  Hz, 4H), 2.70 (t,  $J = 6.2$  Hz, 1H), 2.24 – 1.94 (m, 12H), 1.76 – 1.58 (m, 24H), 1.41 (ddd,  $J = 13.6, 9.3, 7.2$  Hz, 1H), 1.25 (s, 3H).  **$^{13}\text{C}$  NMR** (126 MHz, CDCl<sub>3</sub>):  $\delta$  140.3, 139.2, 135.4, 132.0, 131.4, 124.5, 124.1, 123.9, 121.8, 121.1, 66.7, 66.5, 63.4, 60.9, 39.9, 39.8, 38.9, 36.3, 27.3, 26.9, 26.5, 25.8, 24.0, 17.8, 17.8, 16.7, 16.7, 16.6, 16.1. **MS**: calculated mass for [C<sub>30</sub>H<sub>50</sub>O<sub>2</sub>+H]<sup>+</sup>: 443.388, ESI+ found 443.389; [C<sub>30</sub>H<sub>50</sub>O<sub>2</sub>+NH<sub>4</sub>]<sup>+</sup>: 460.415, ESI+ found 460.414; [C<sub>30</sub>H<sub>50</sub>O<sub>2</sub>+Na]<sup>+</sup>: 465.370, ESI+ found 465.374.

Epoxide **20** (minor product of isolated mixture with epoxide **19**, partially reported):  **$^1\text{H}$  NMR** (500 MHz, CDCl<sub>3</sub>):  $\delta$  5.19 – 5.14 (m, 1H), 1.30 (s, 3H), 1.25 (s, 3H).

**NMR spectra follow beginning on page S-29.**



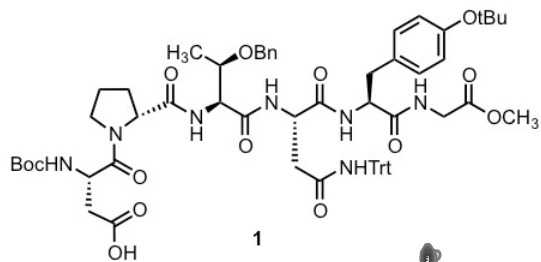

25 °C  
zTOCSY

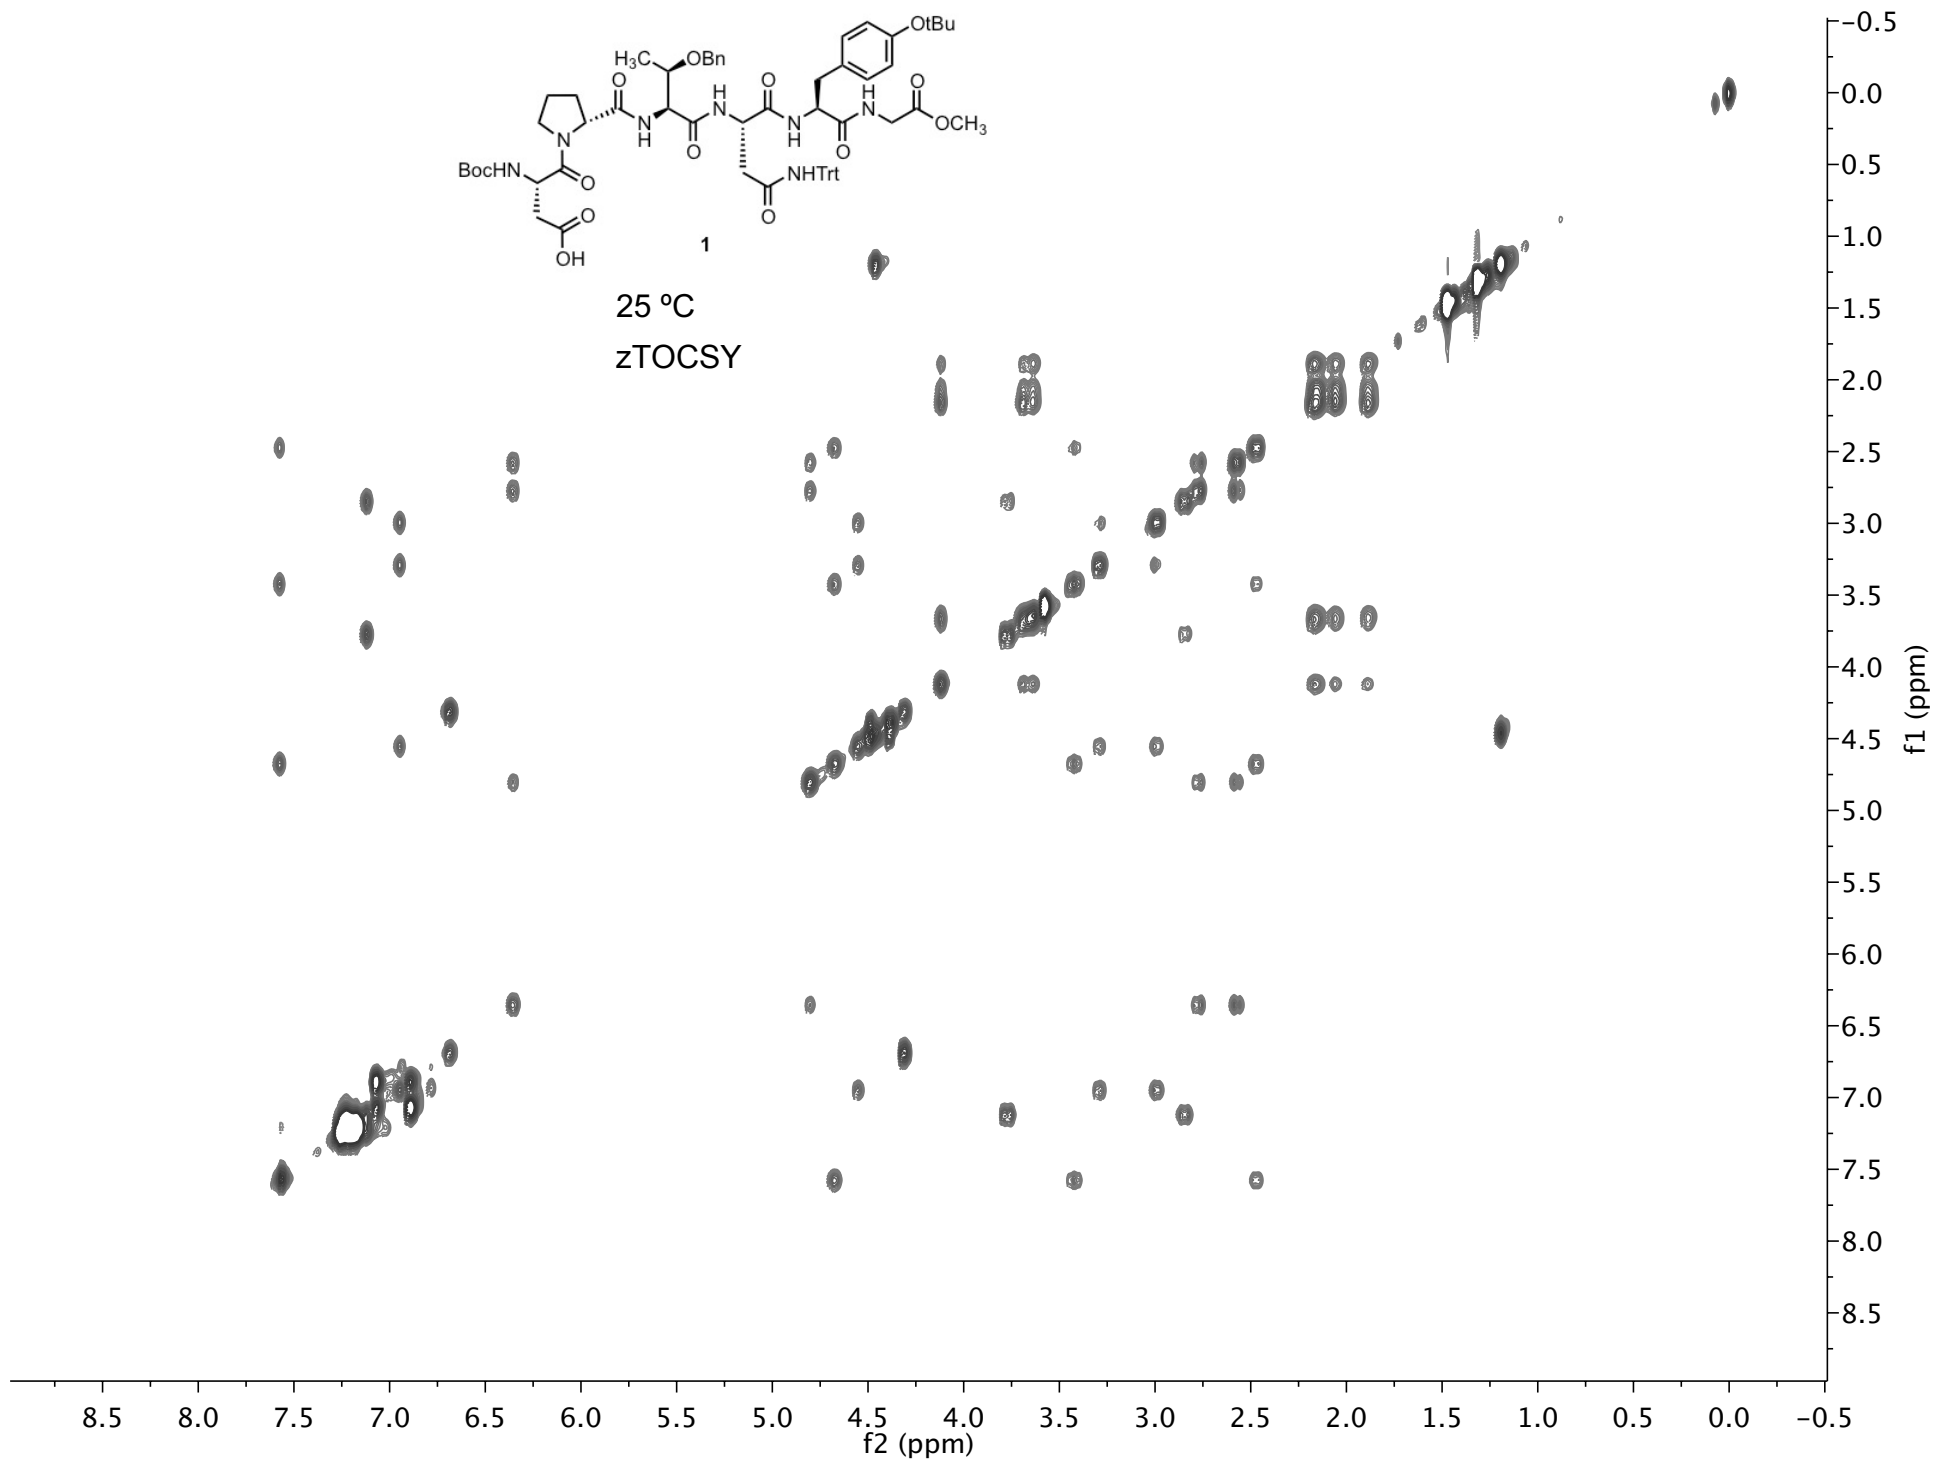

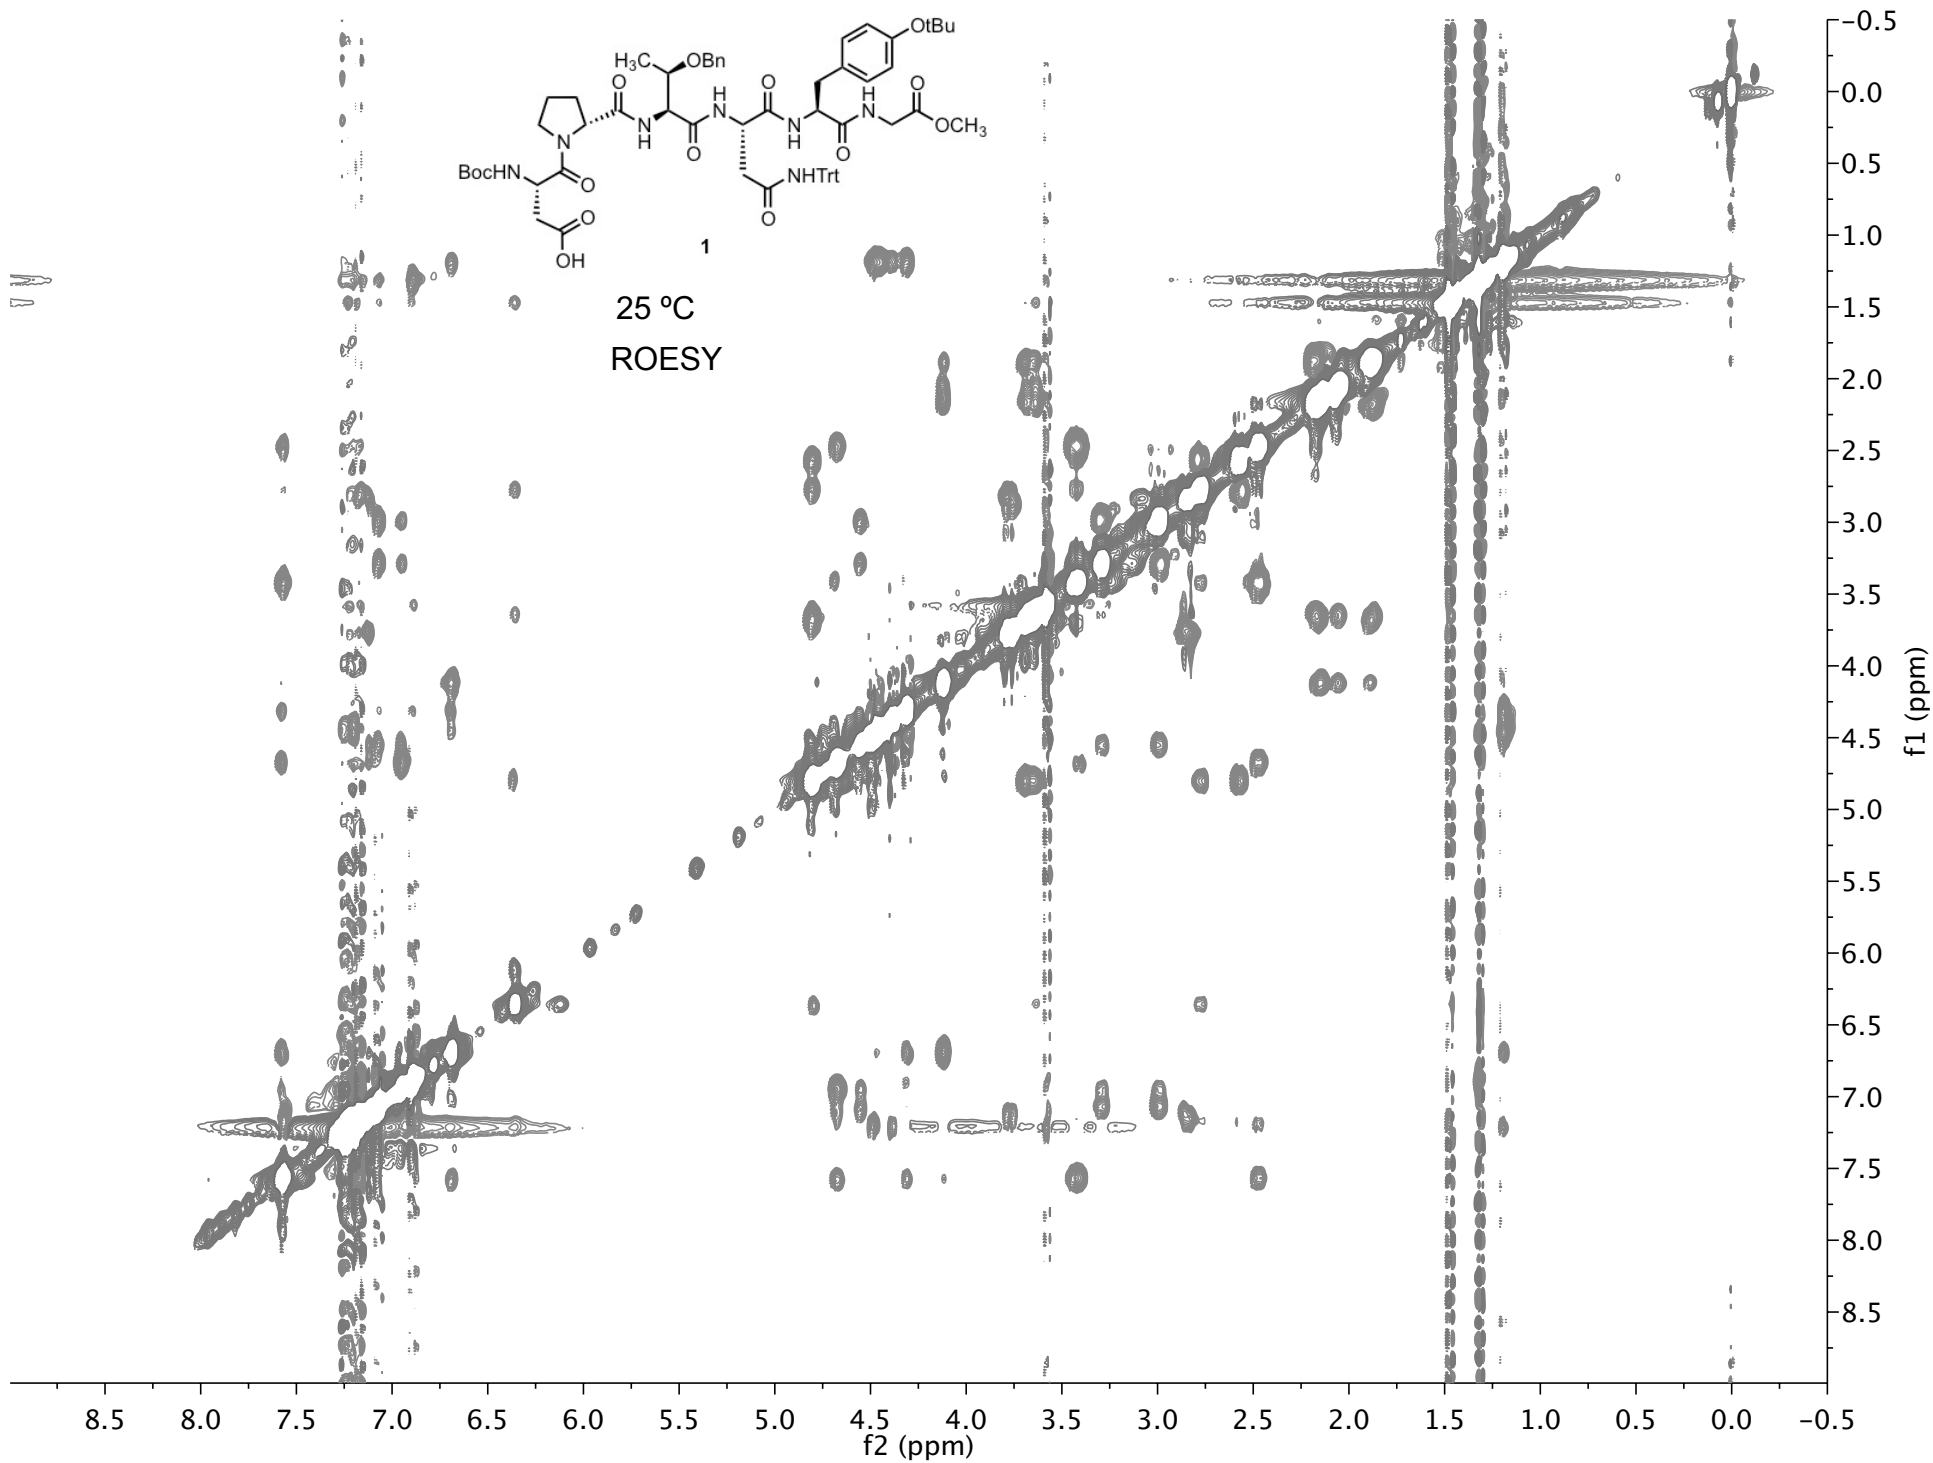





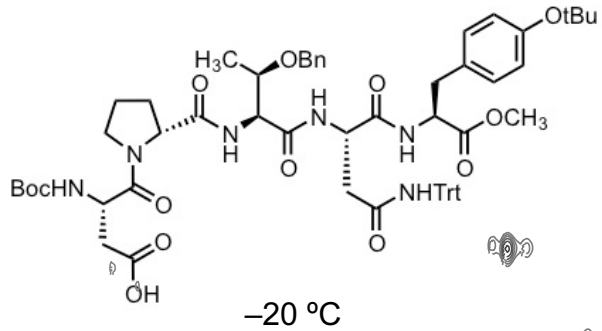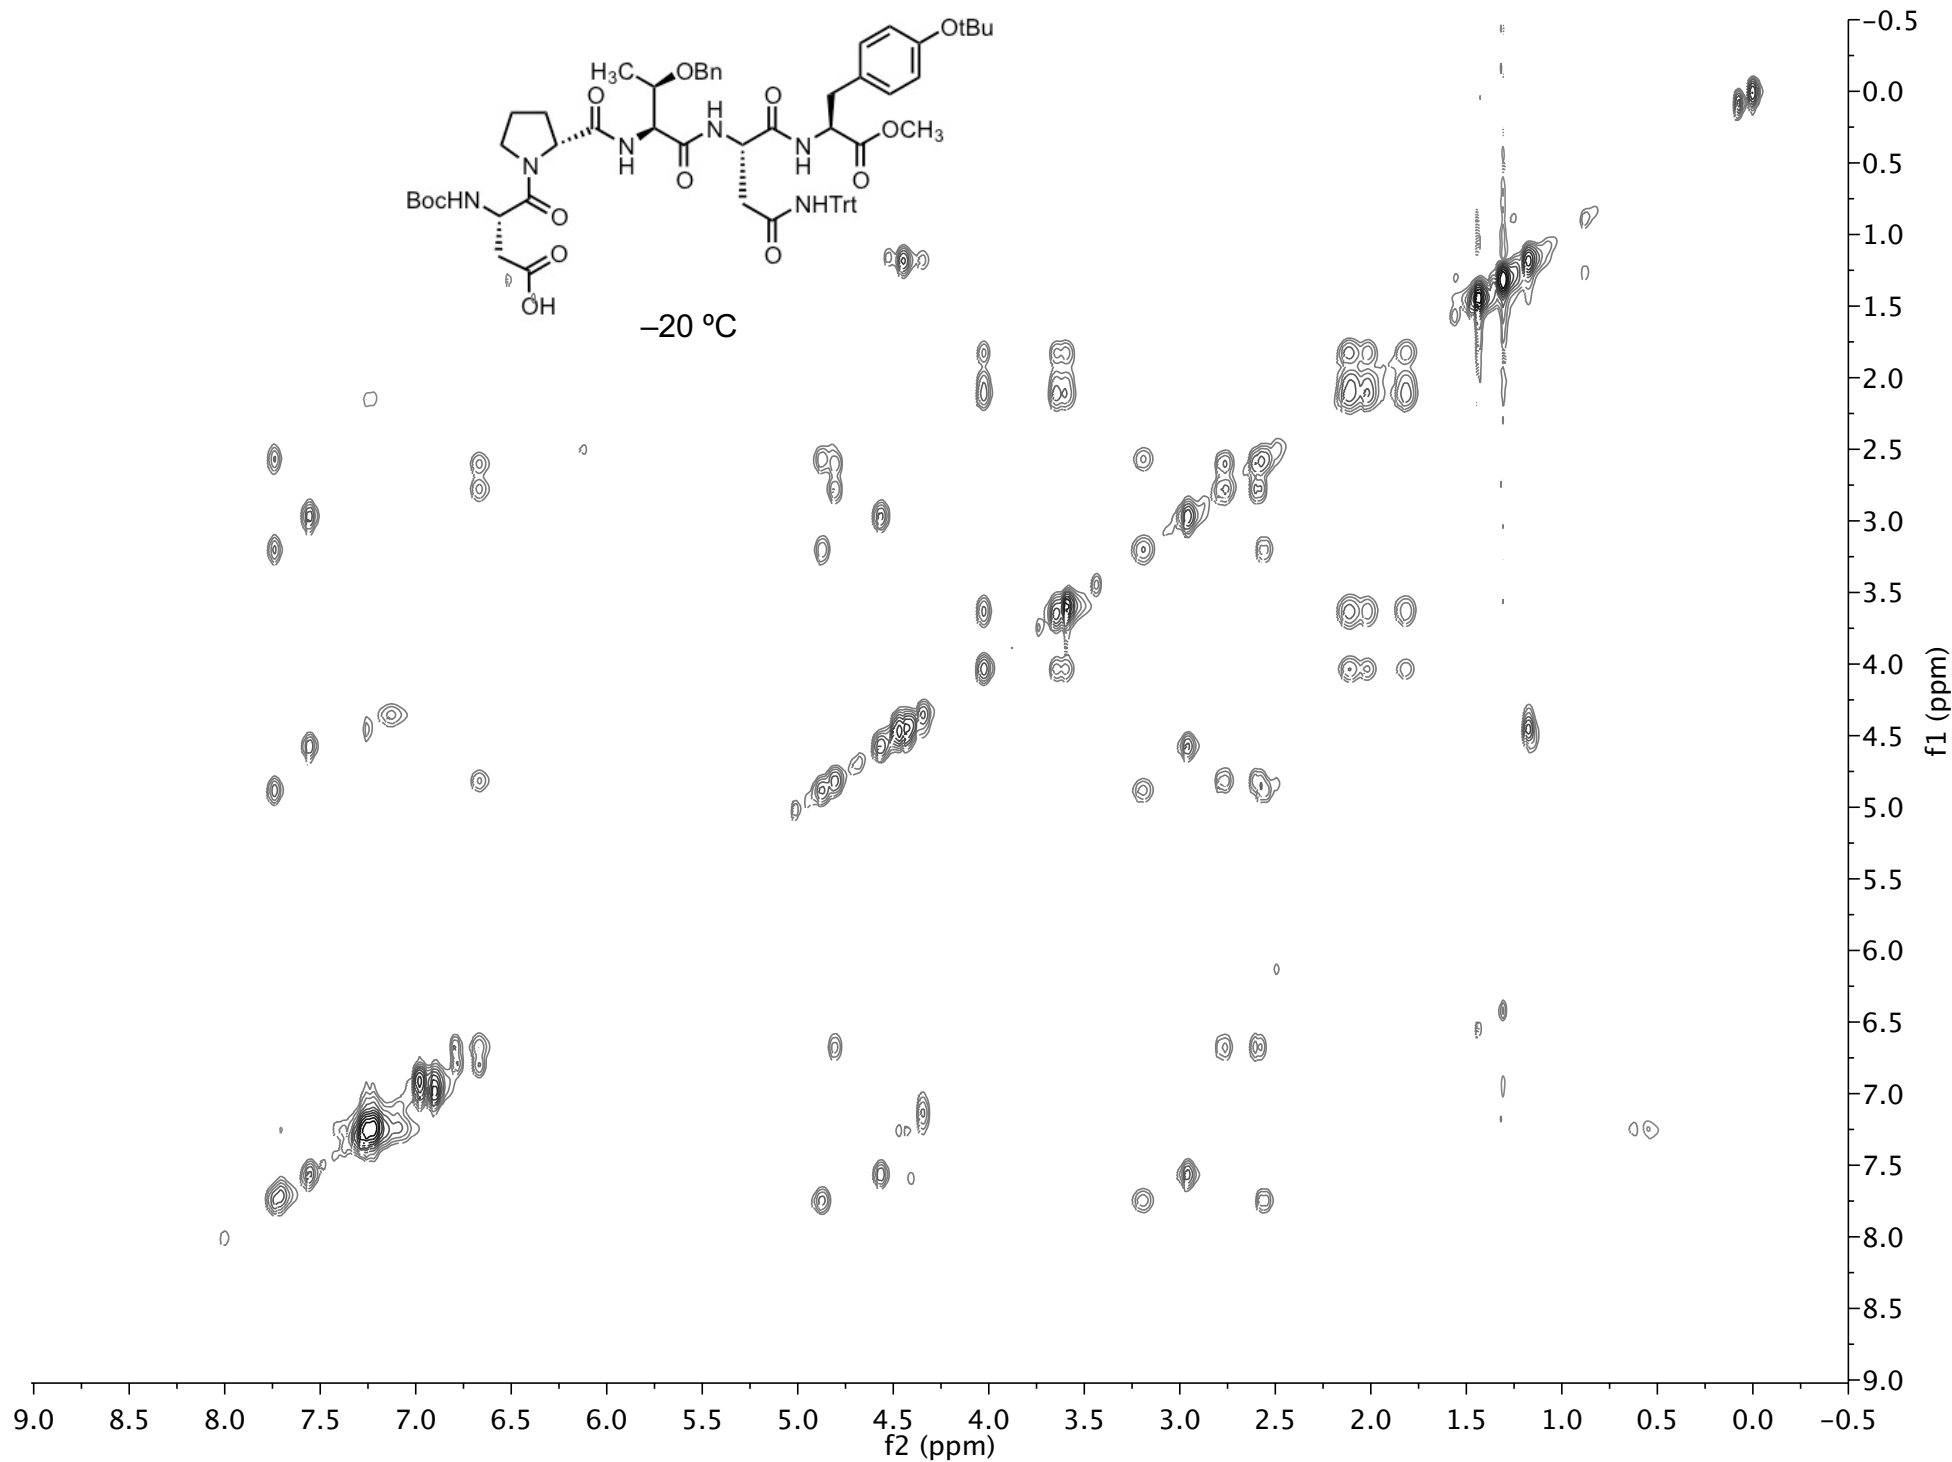

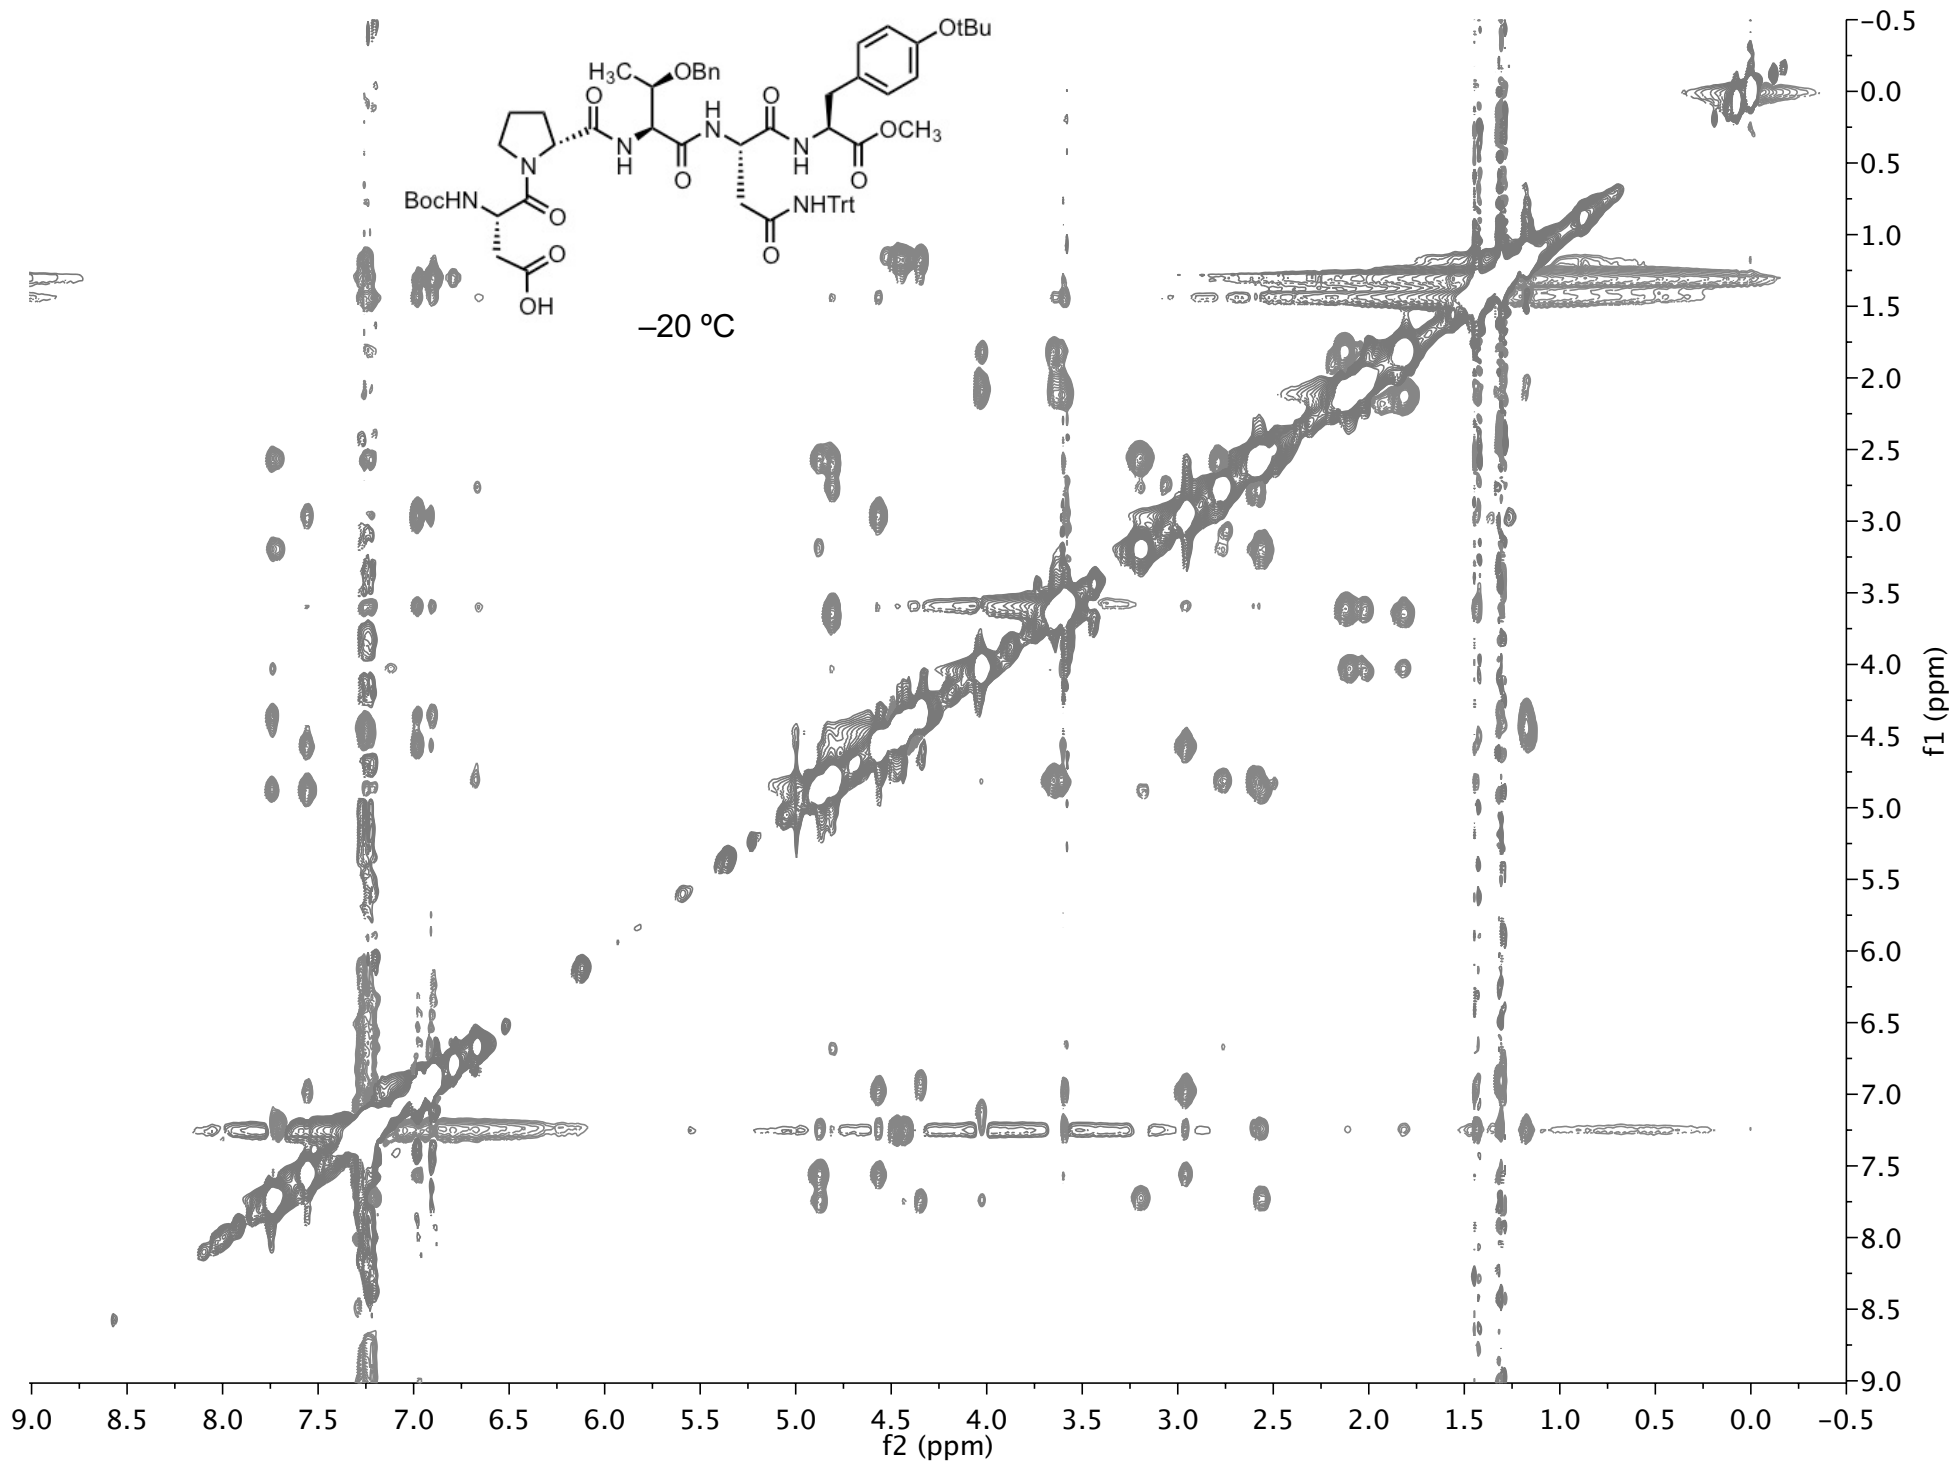

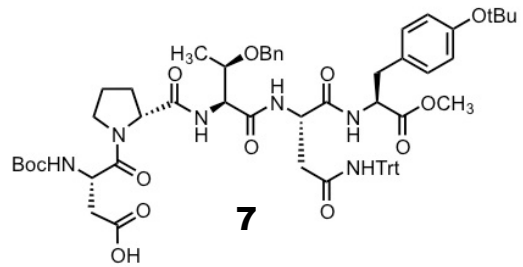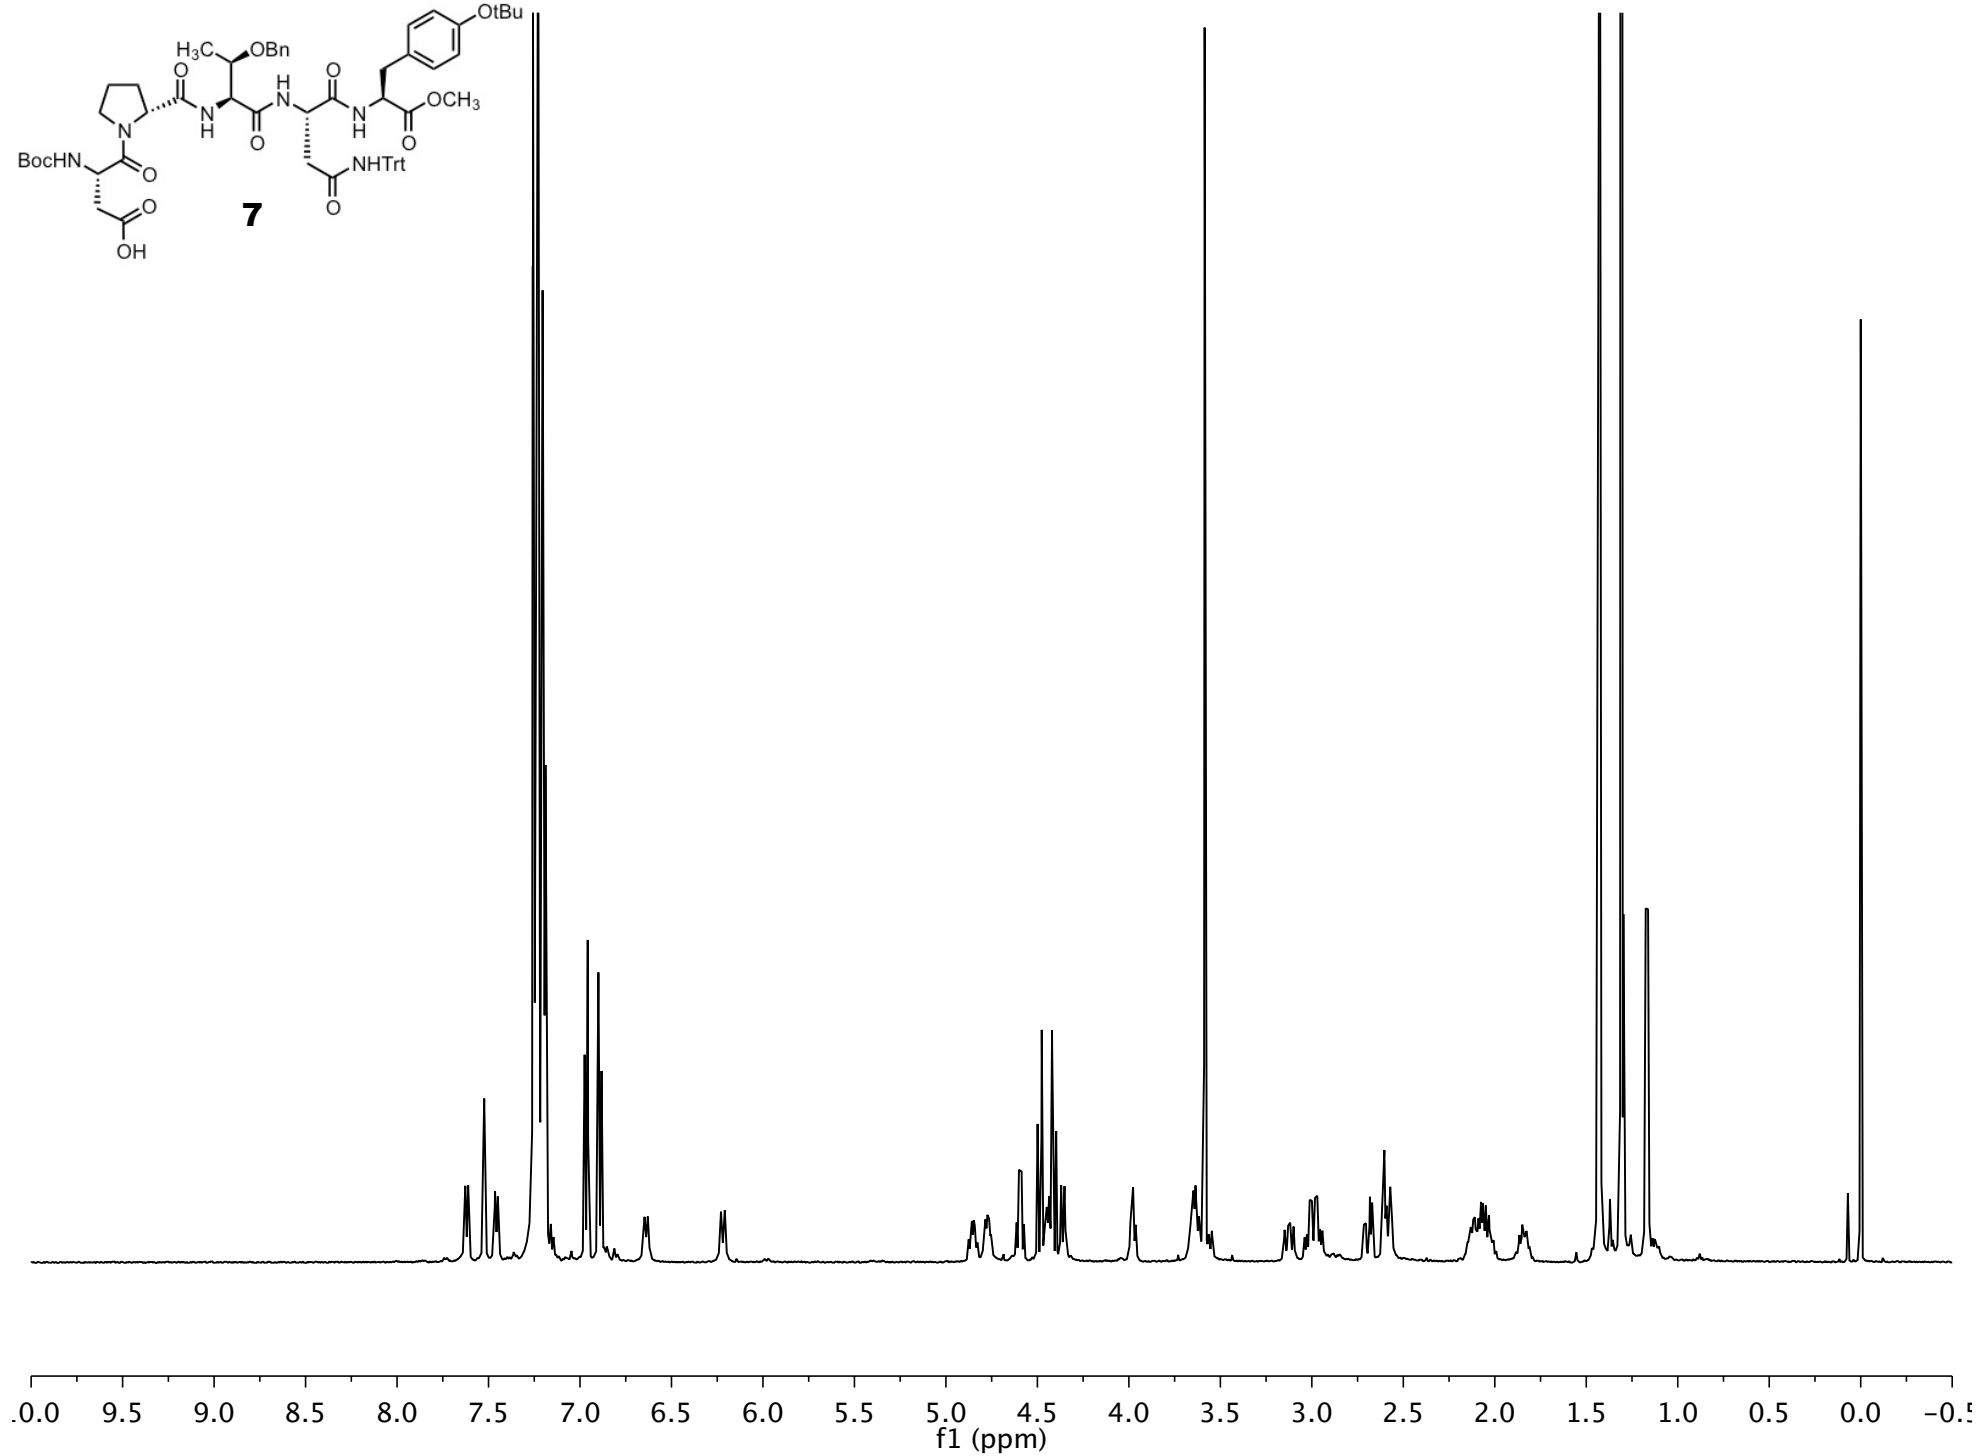

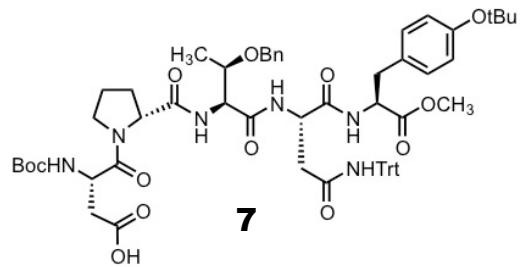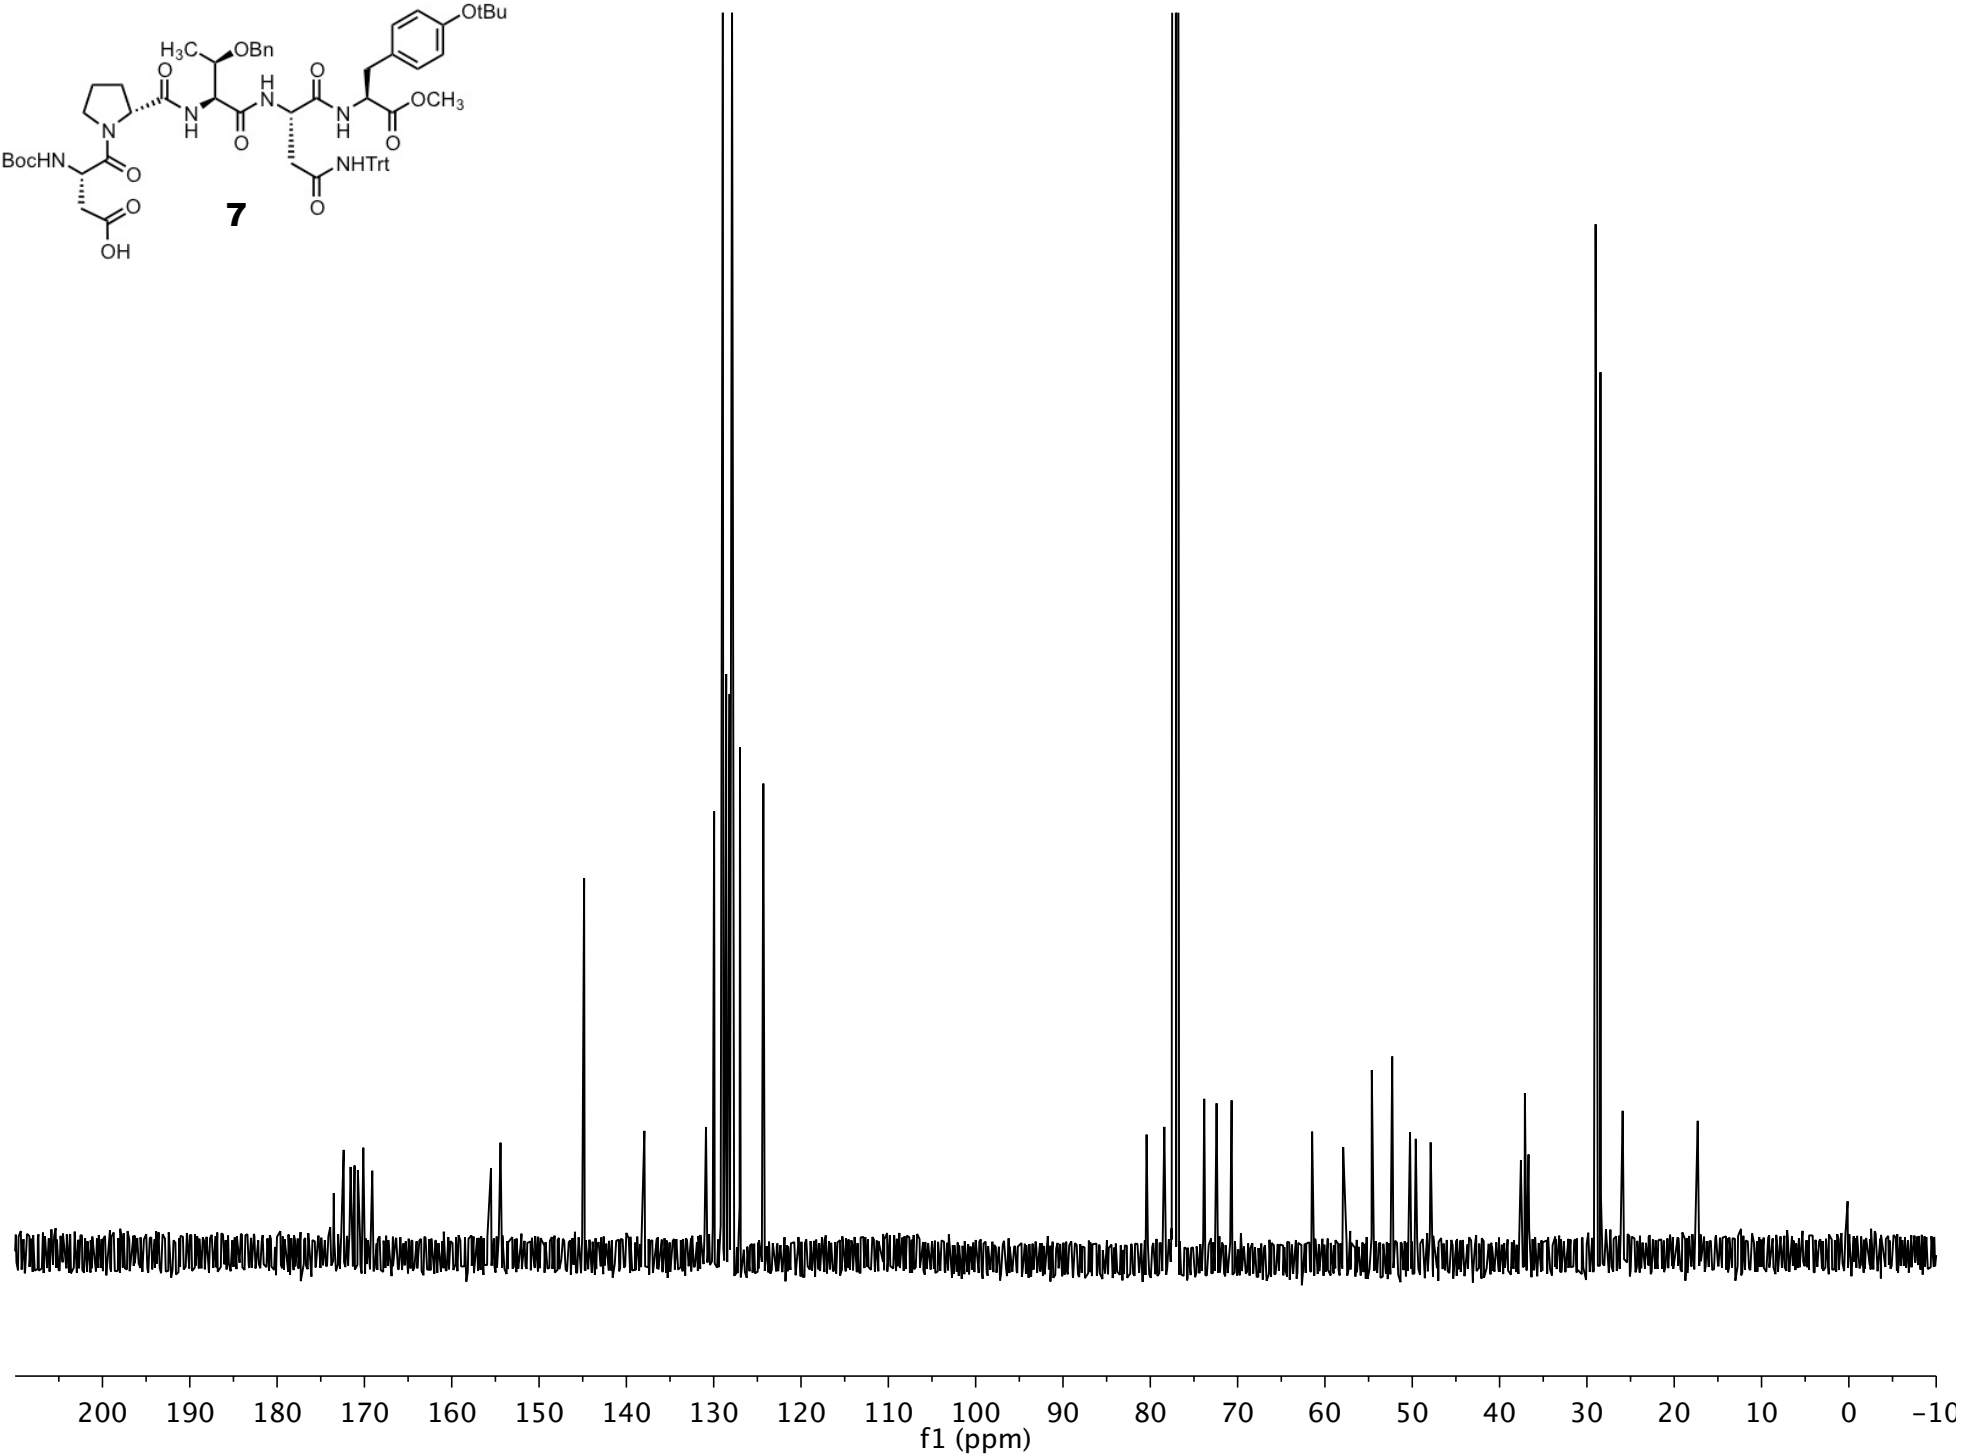



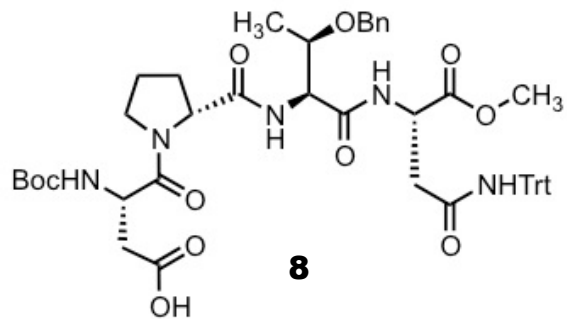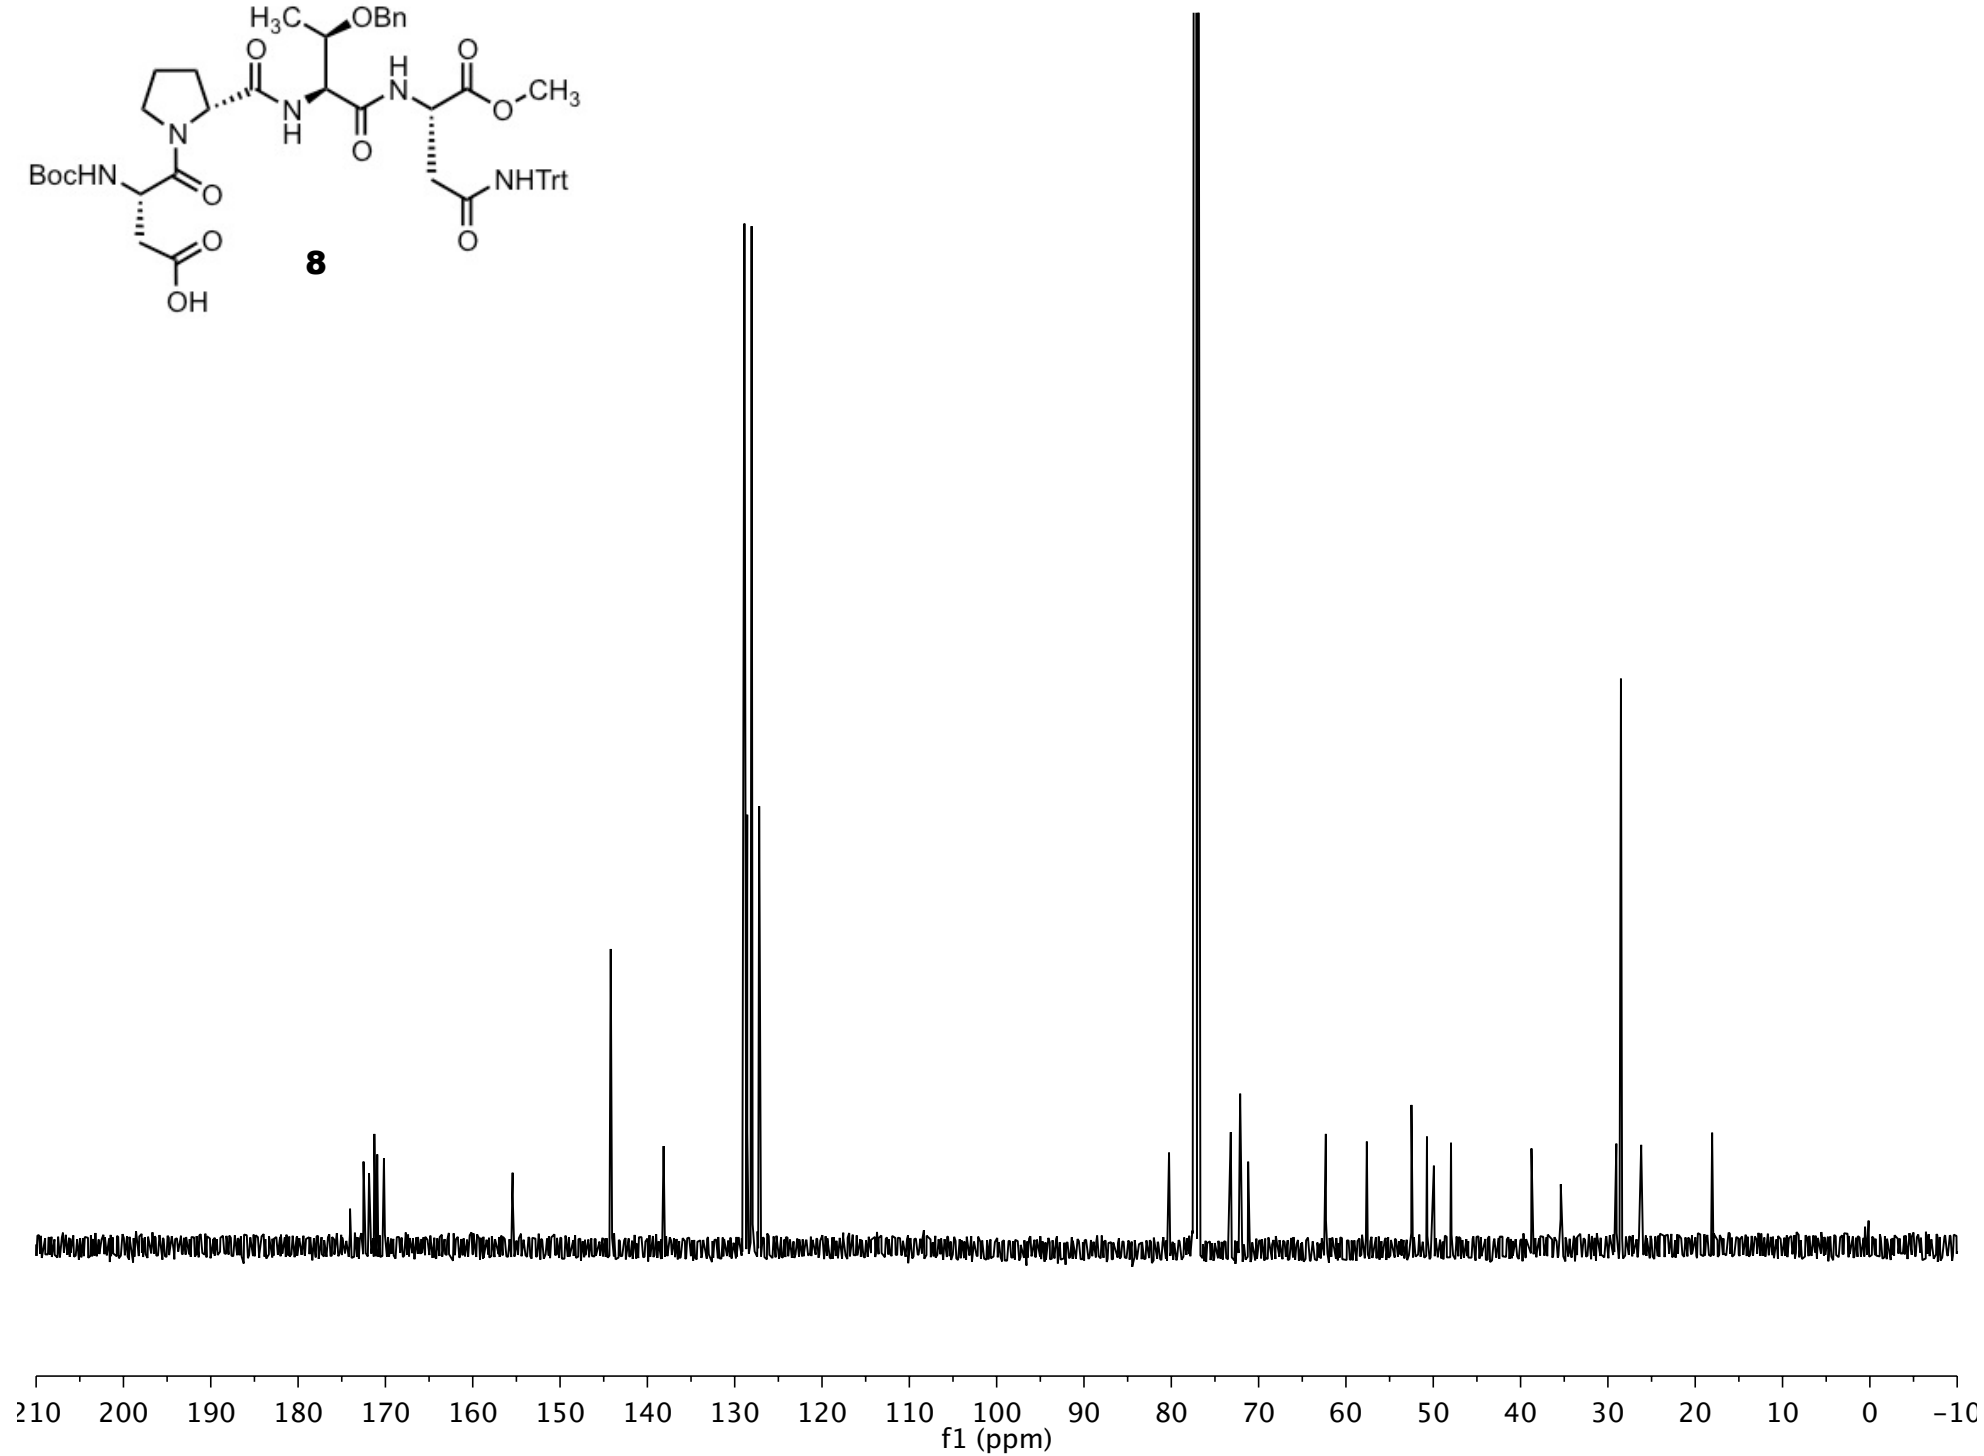

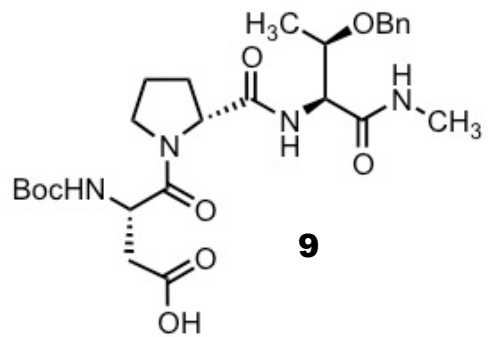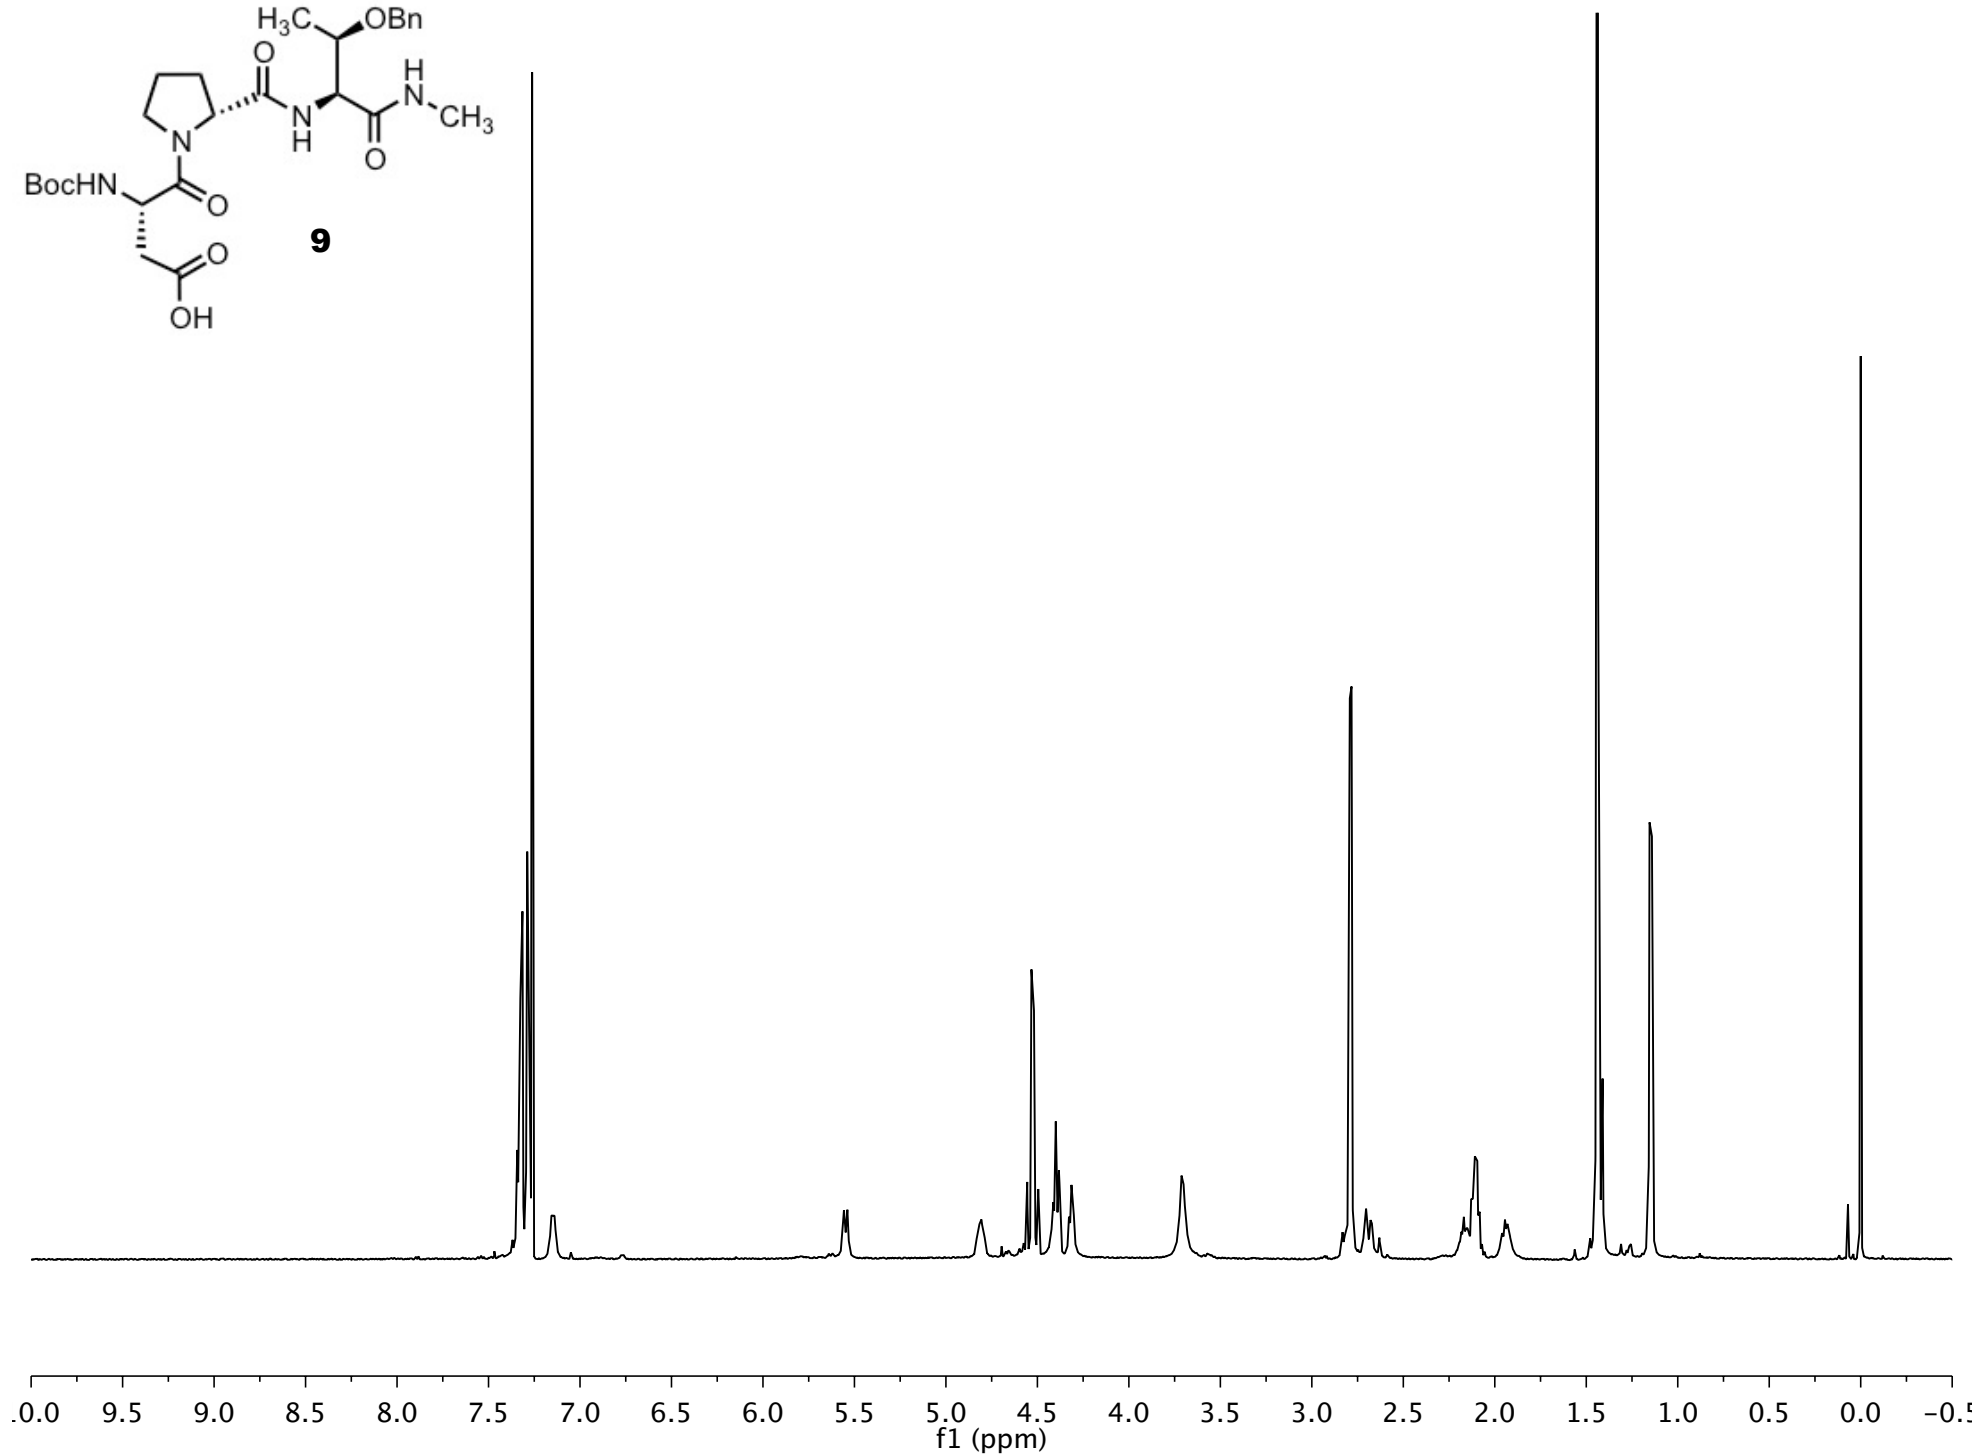

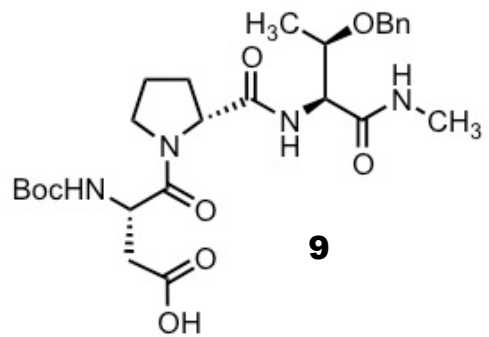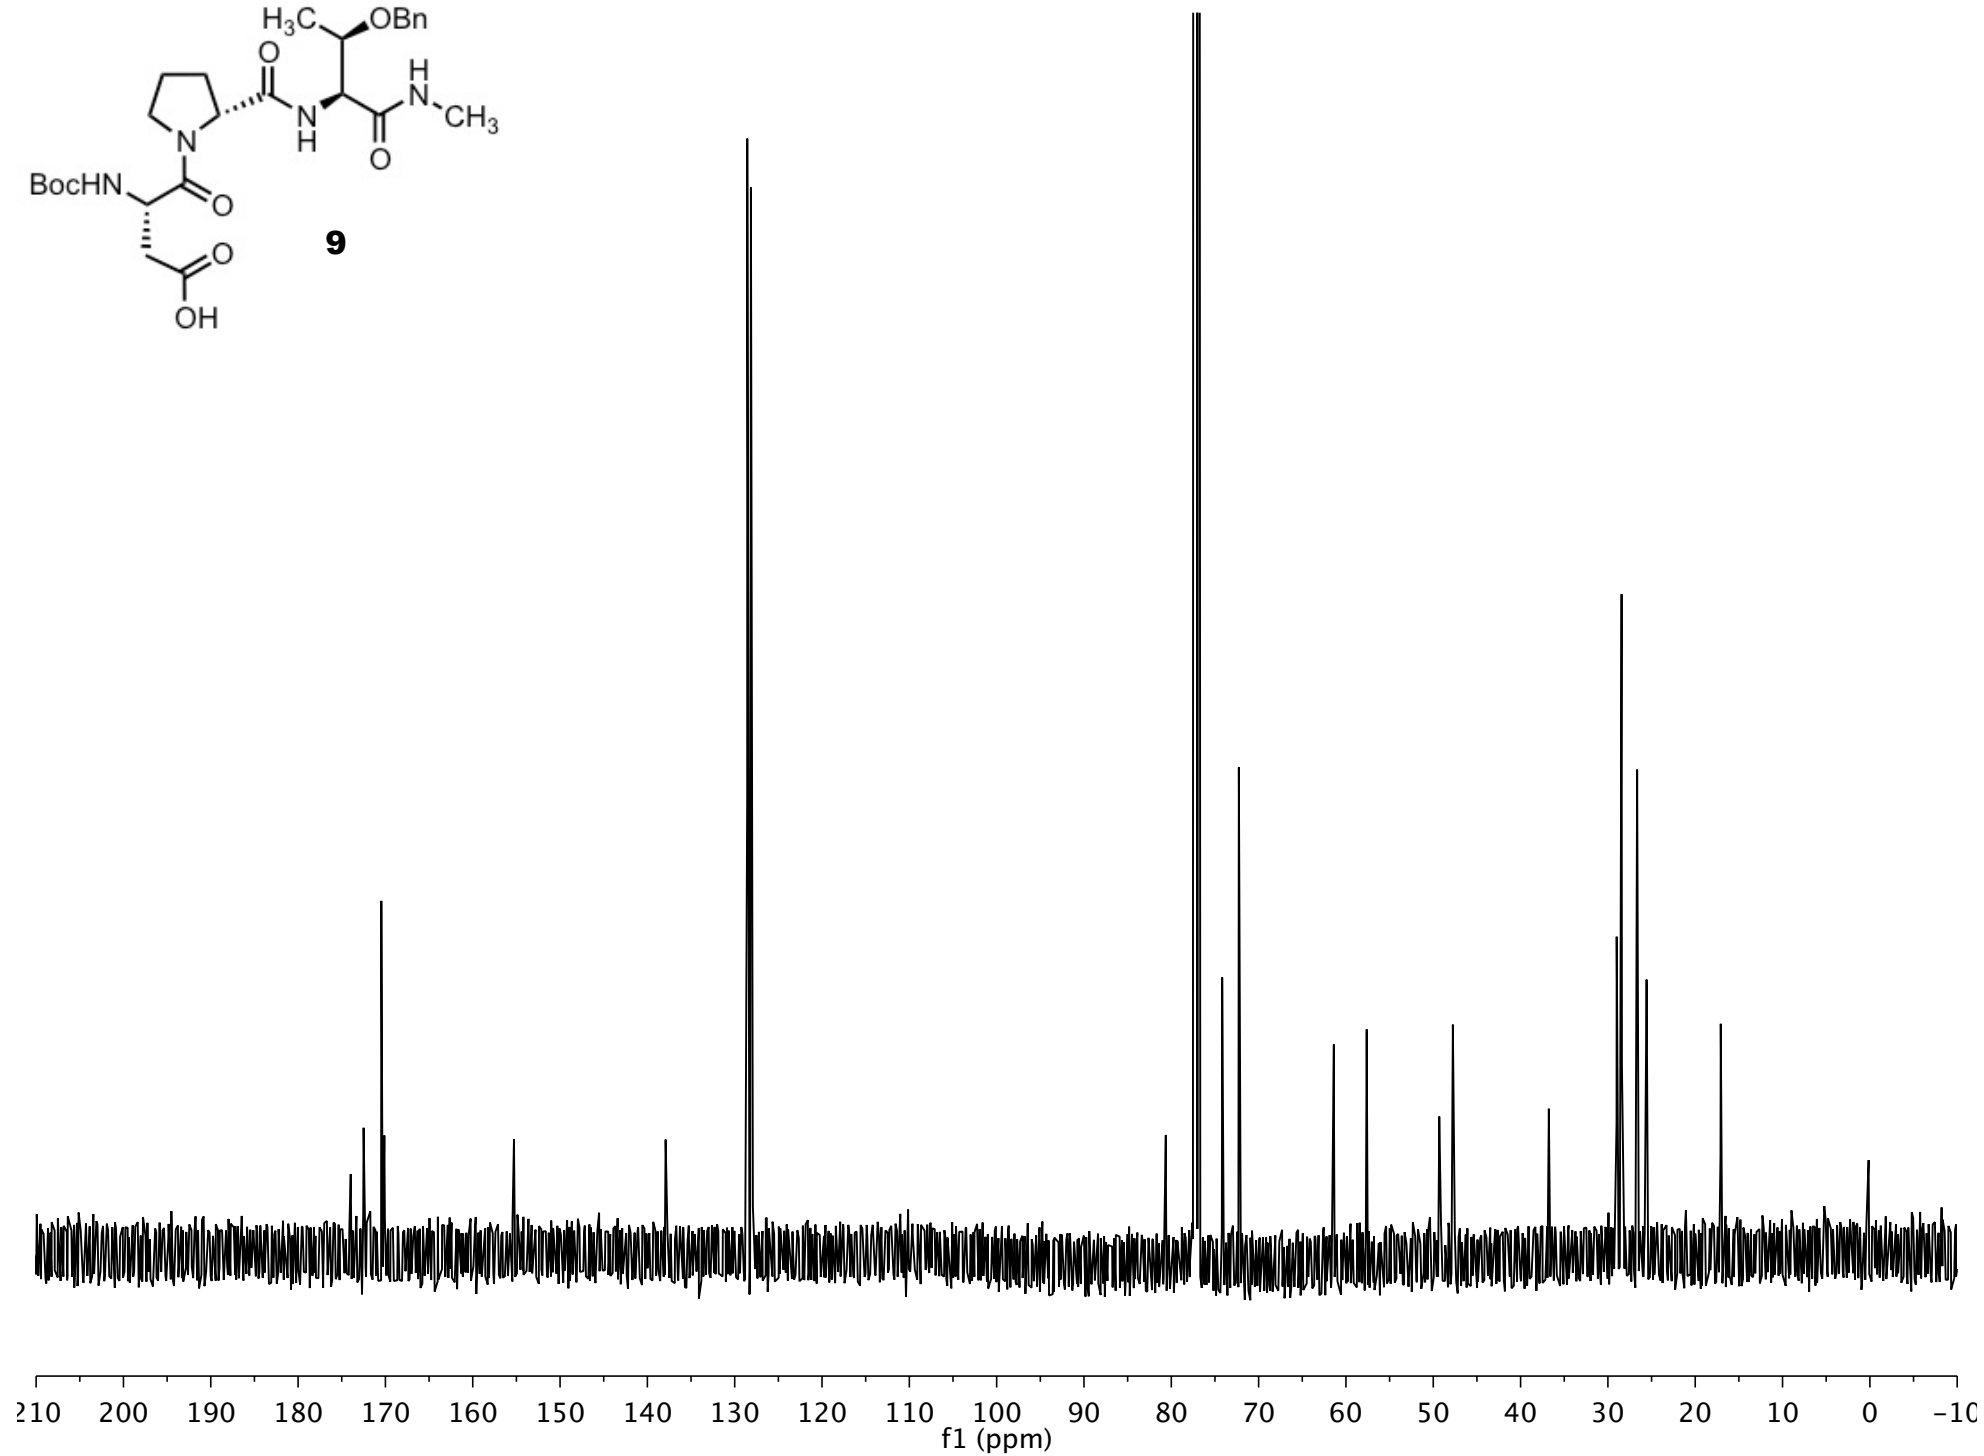



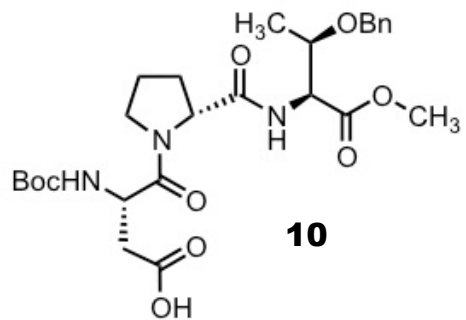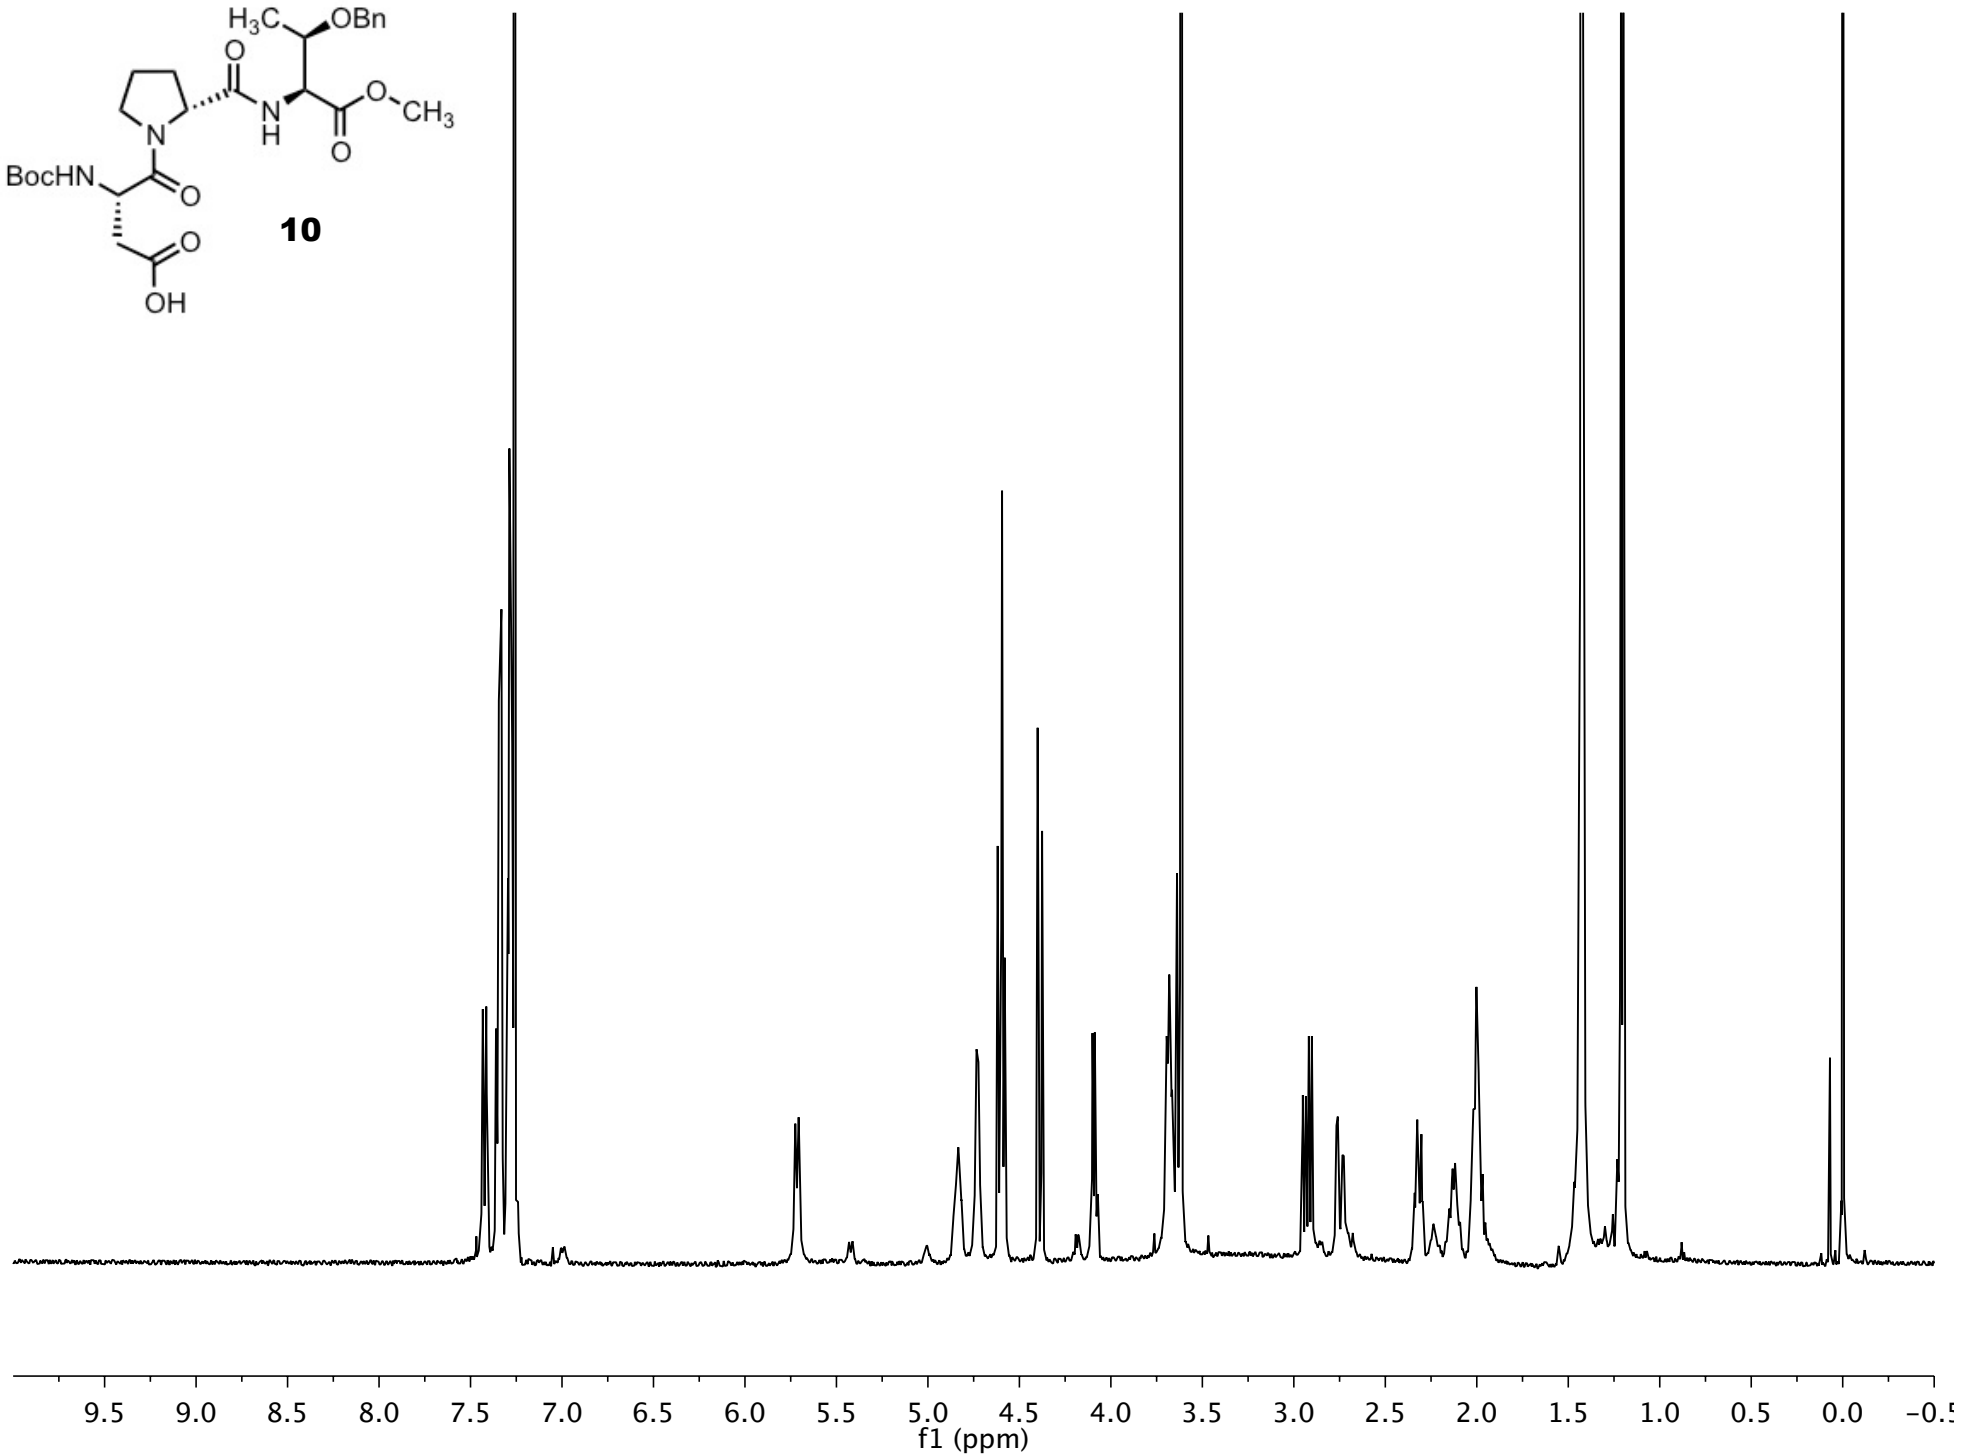

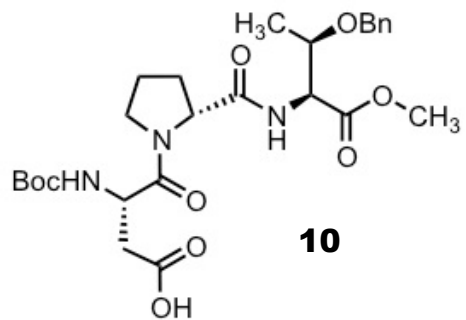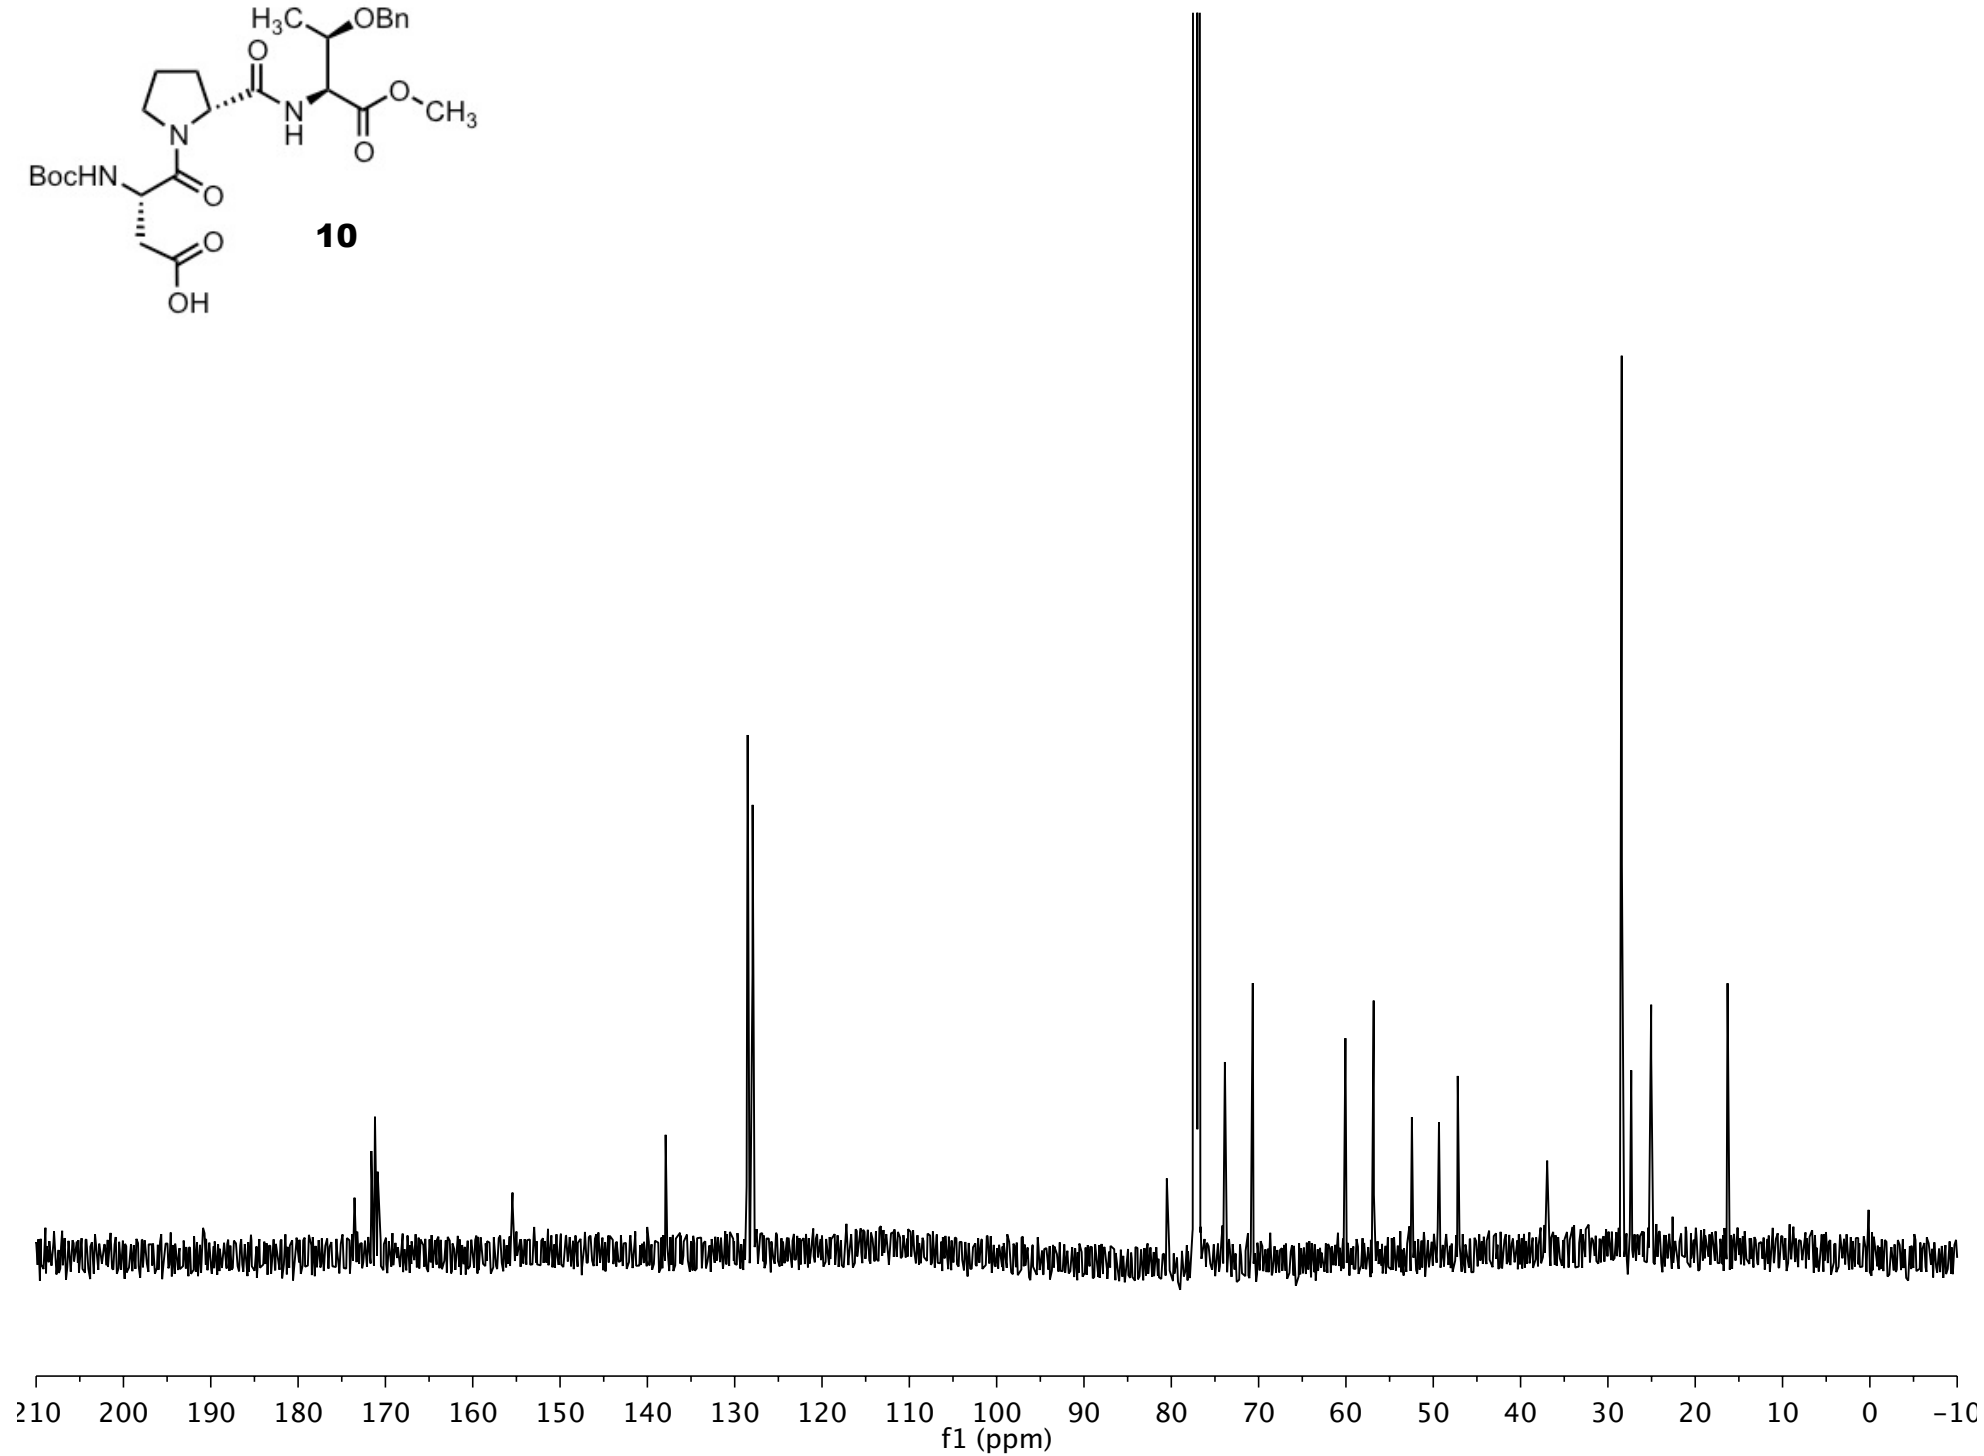

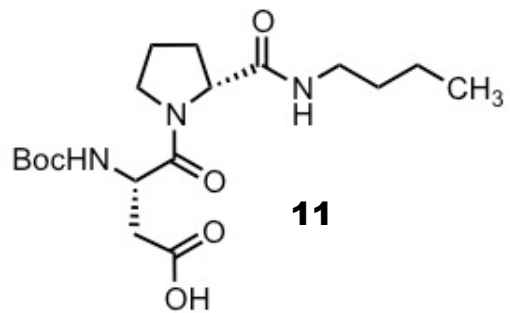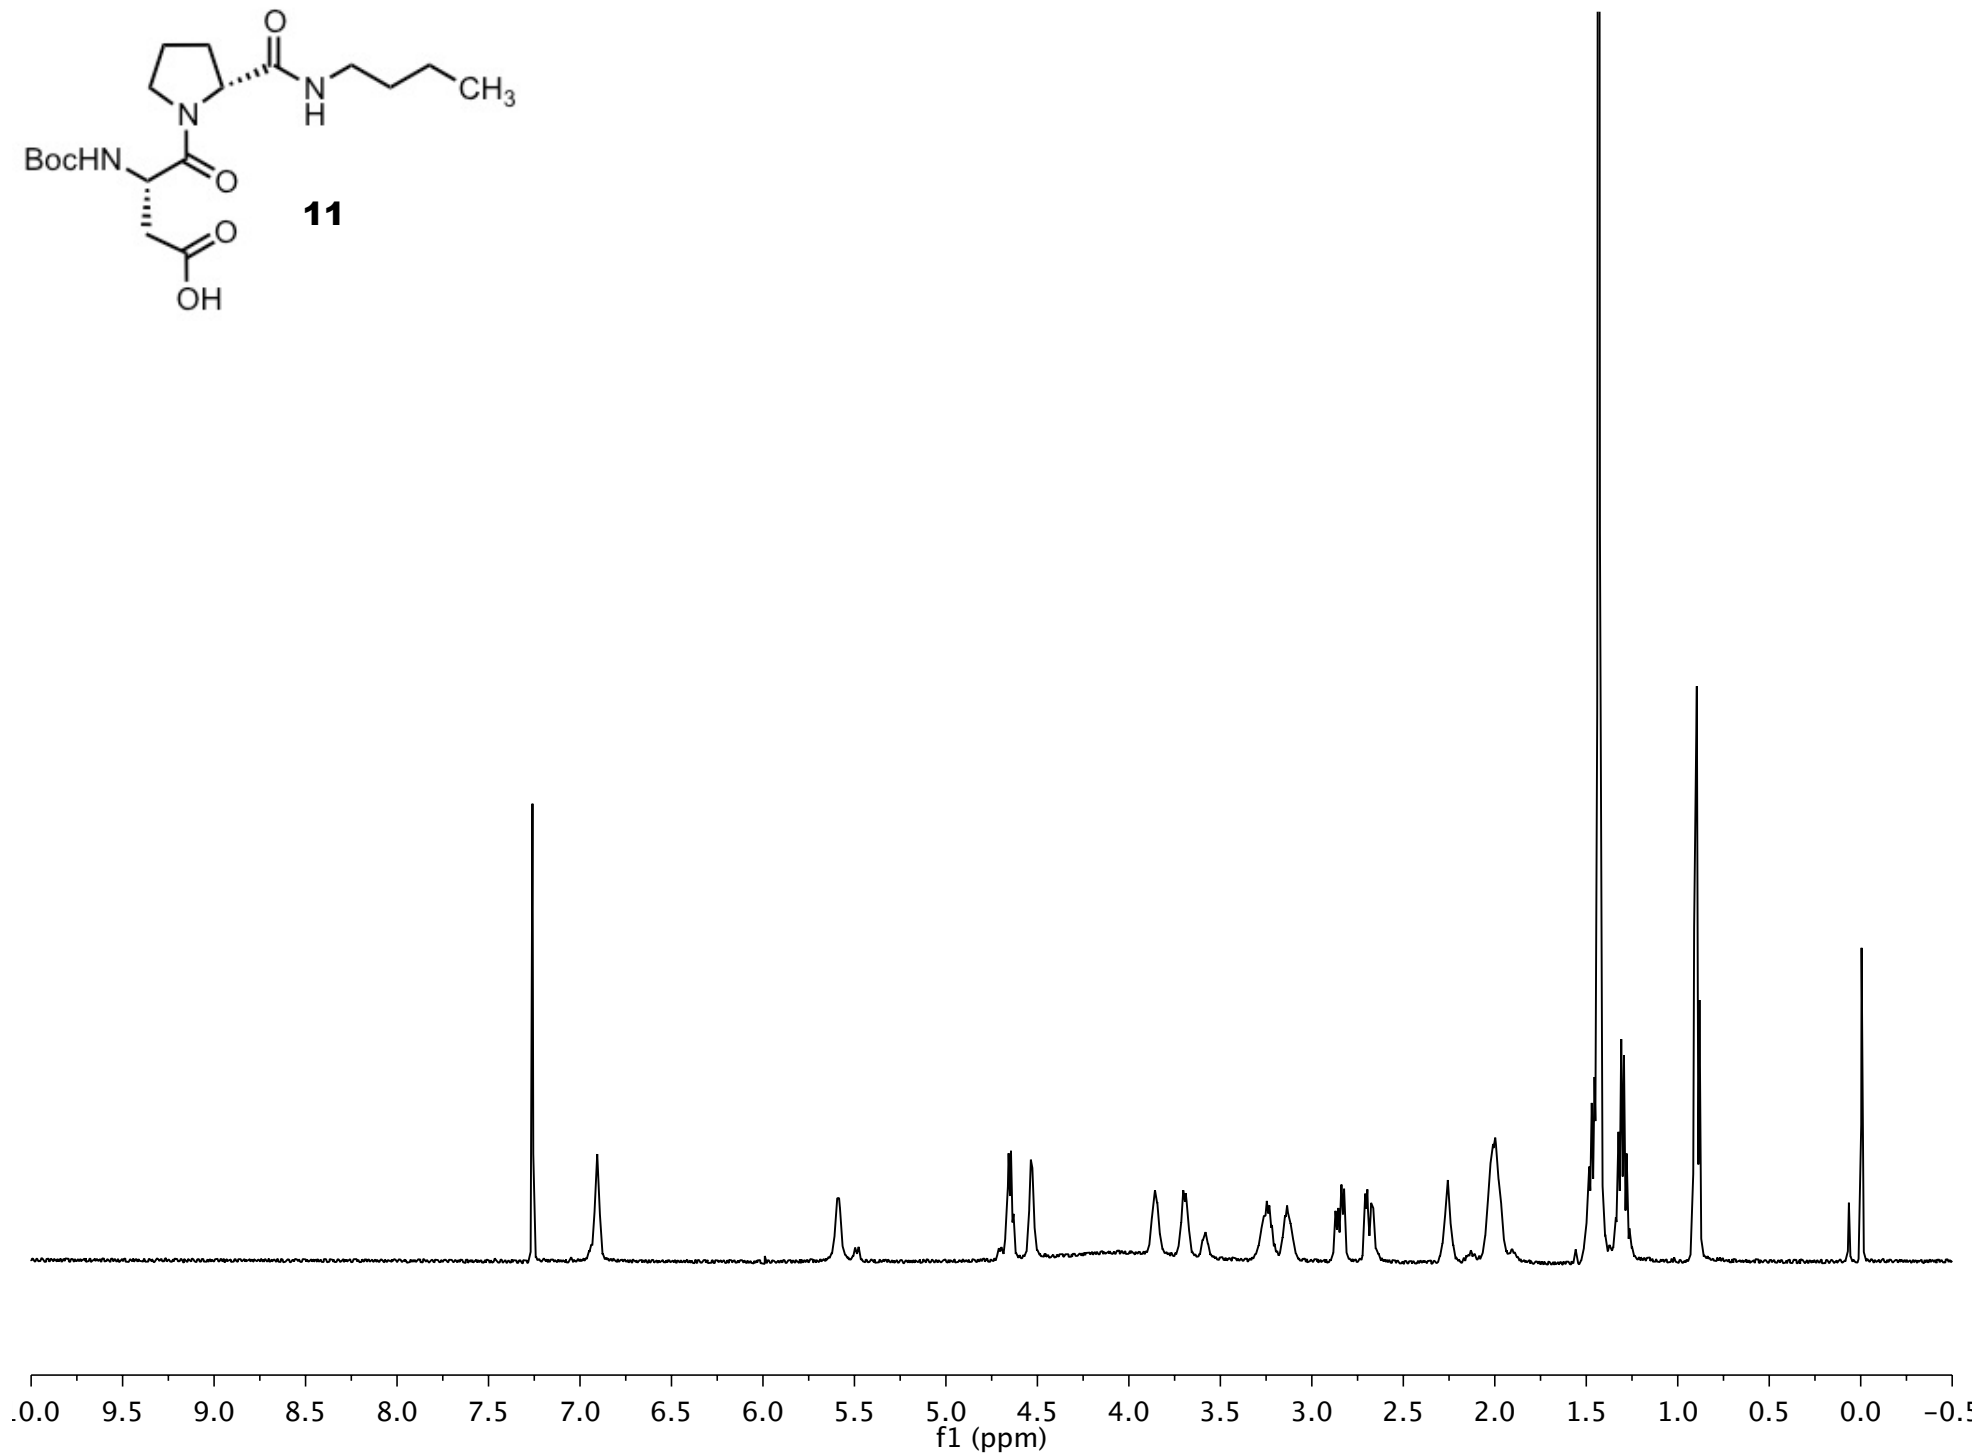

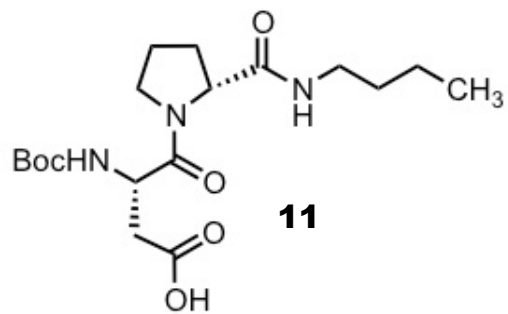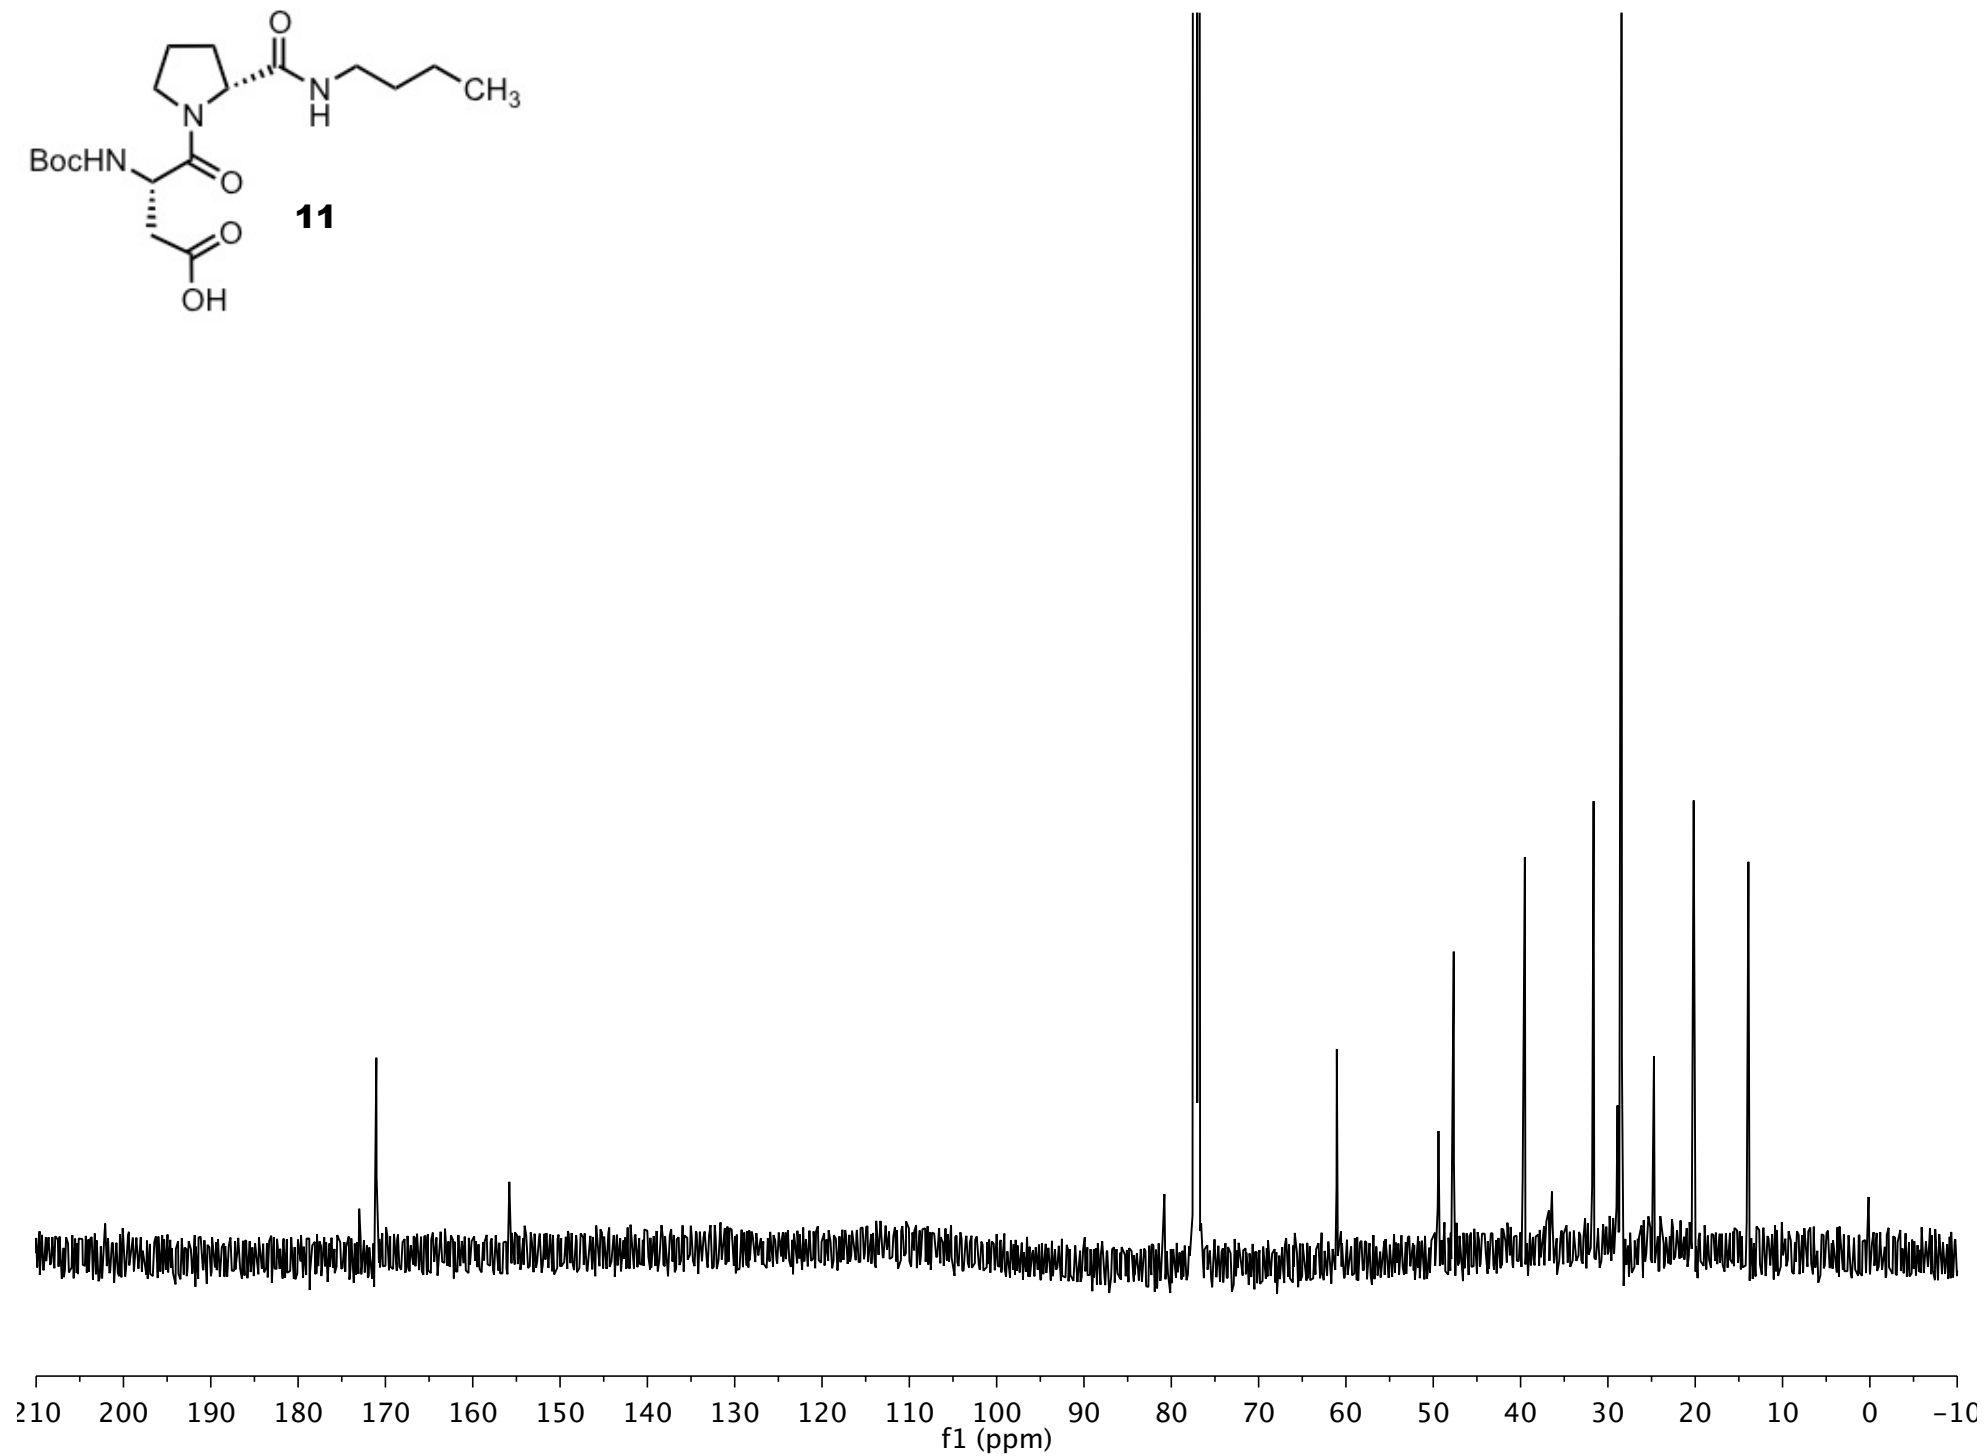

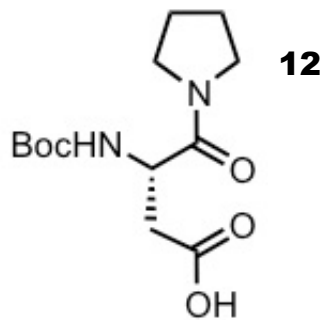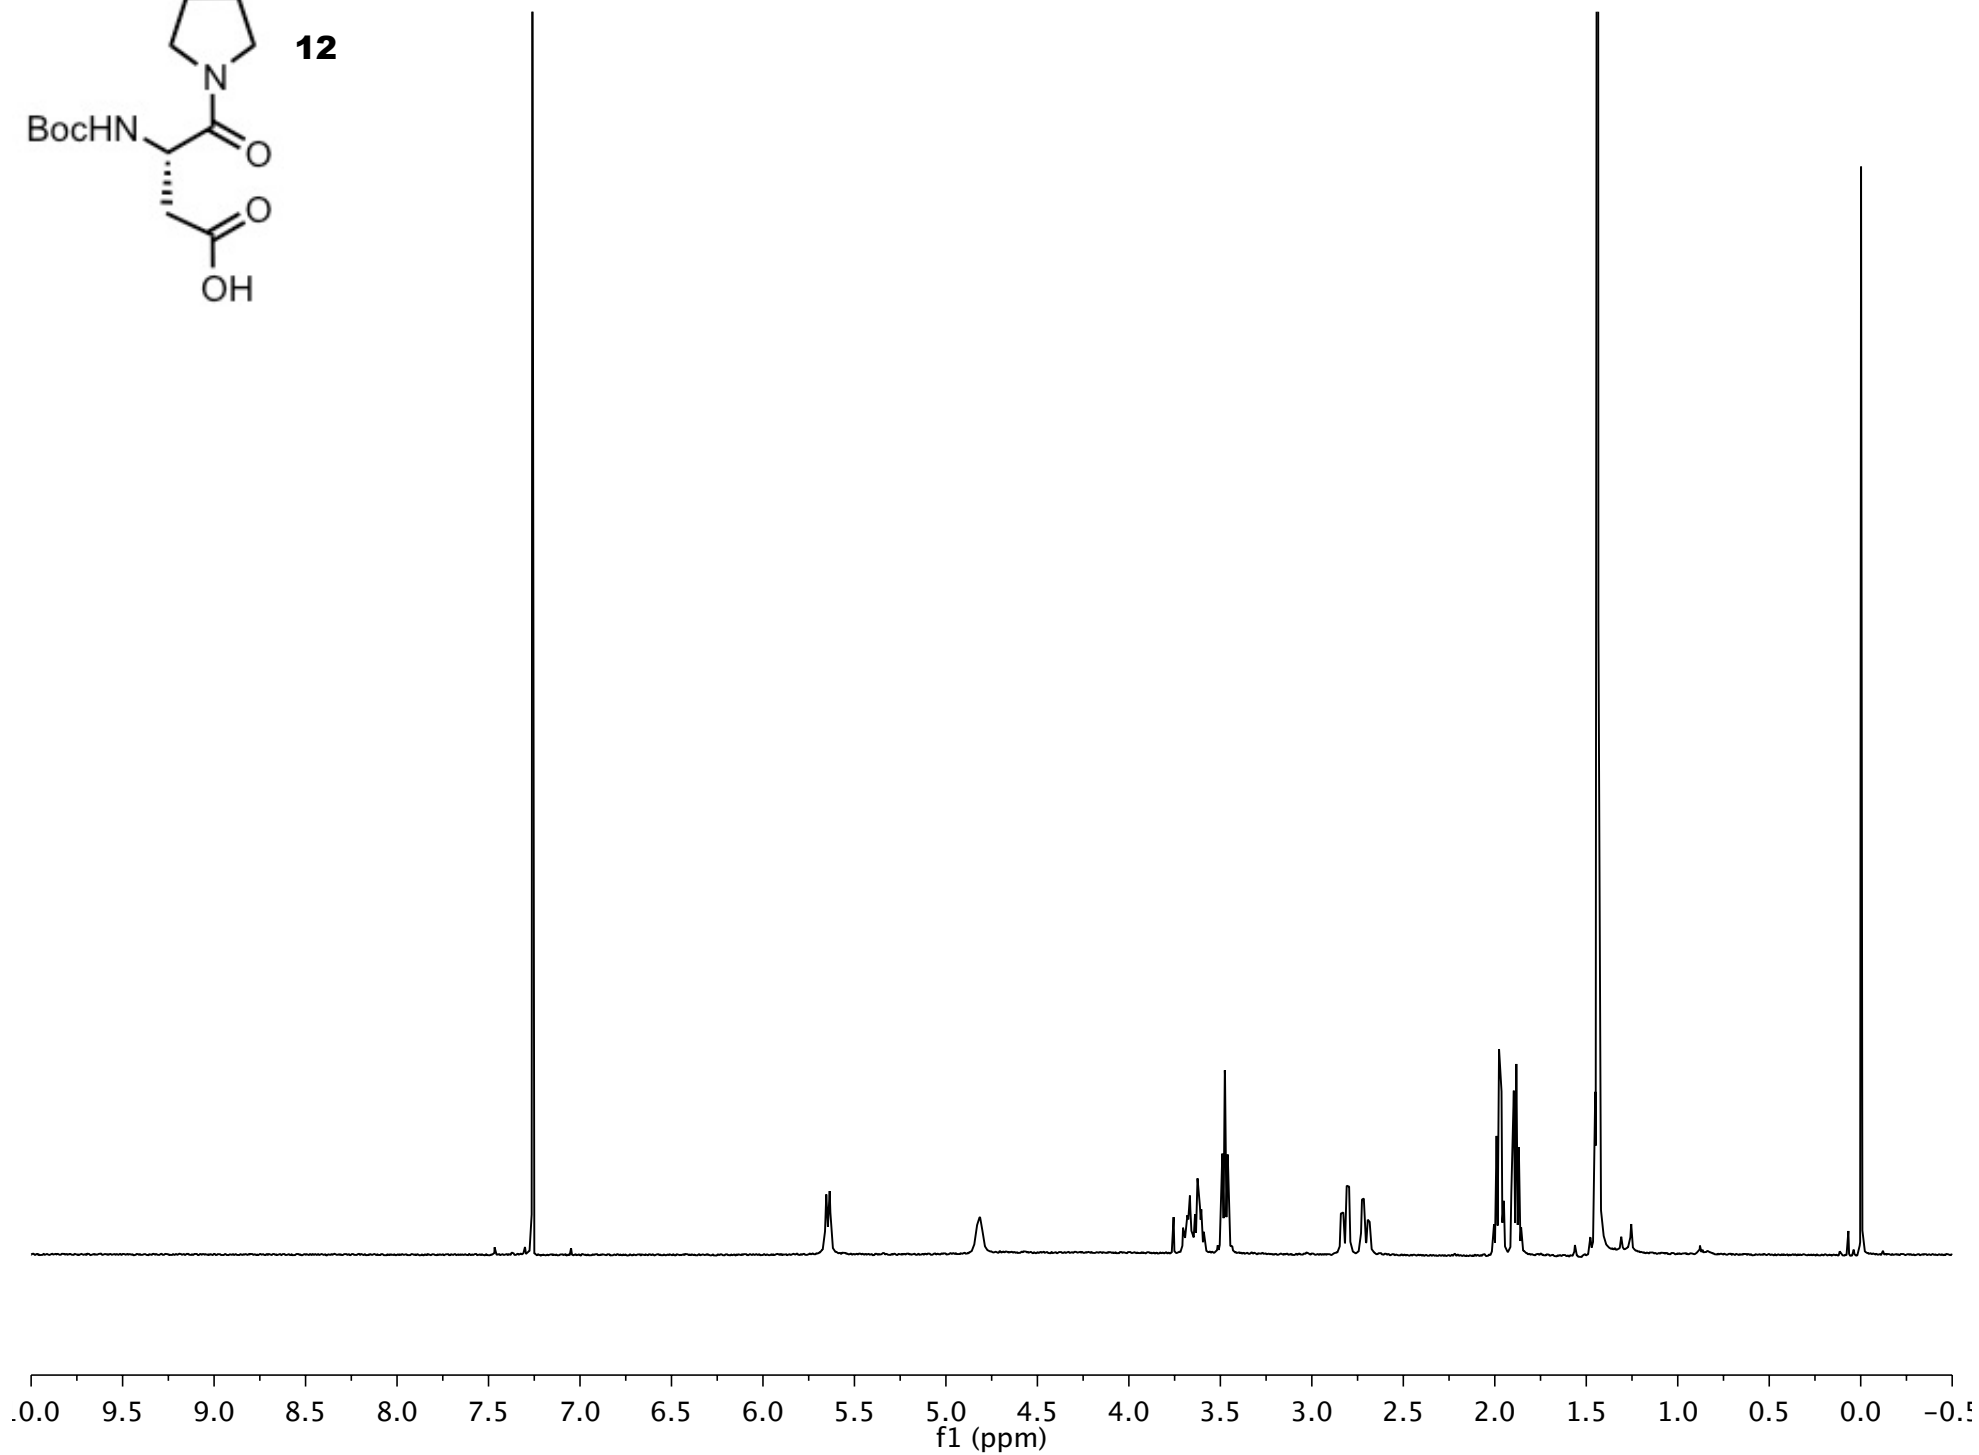

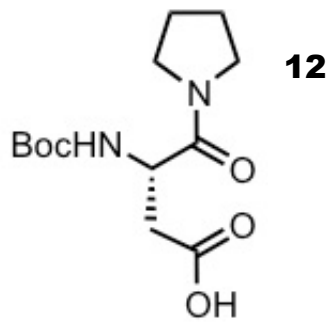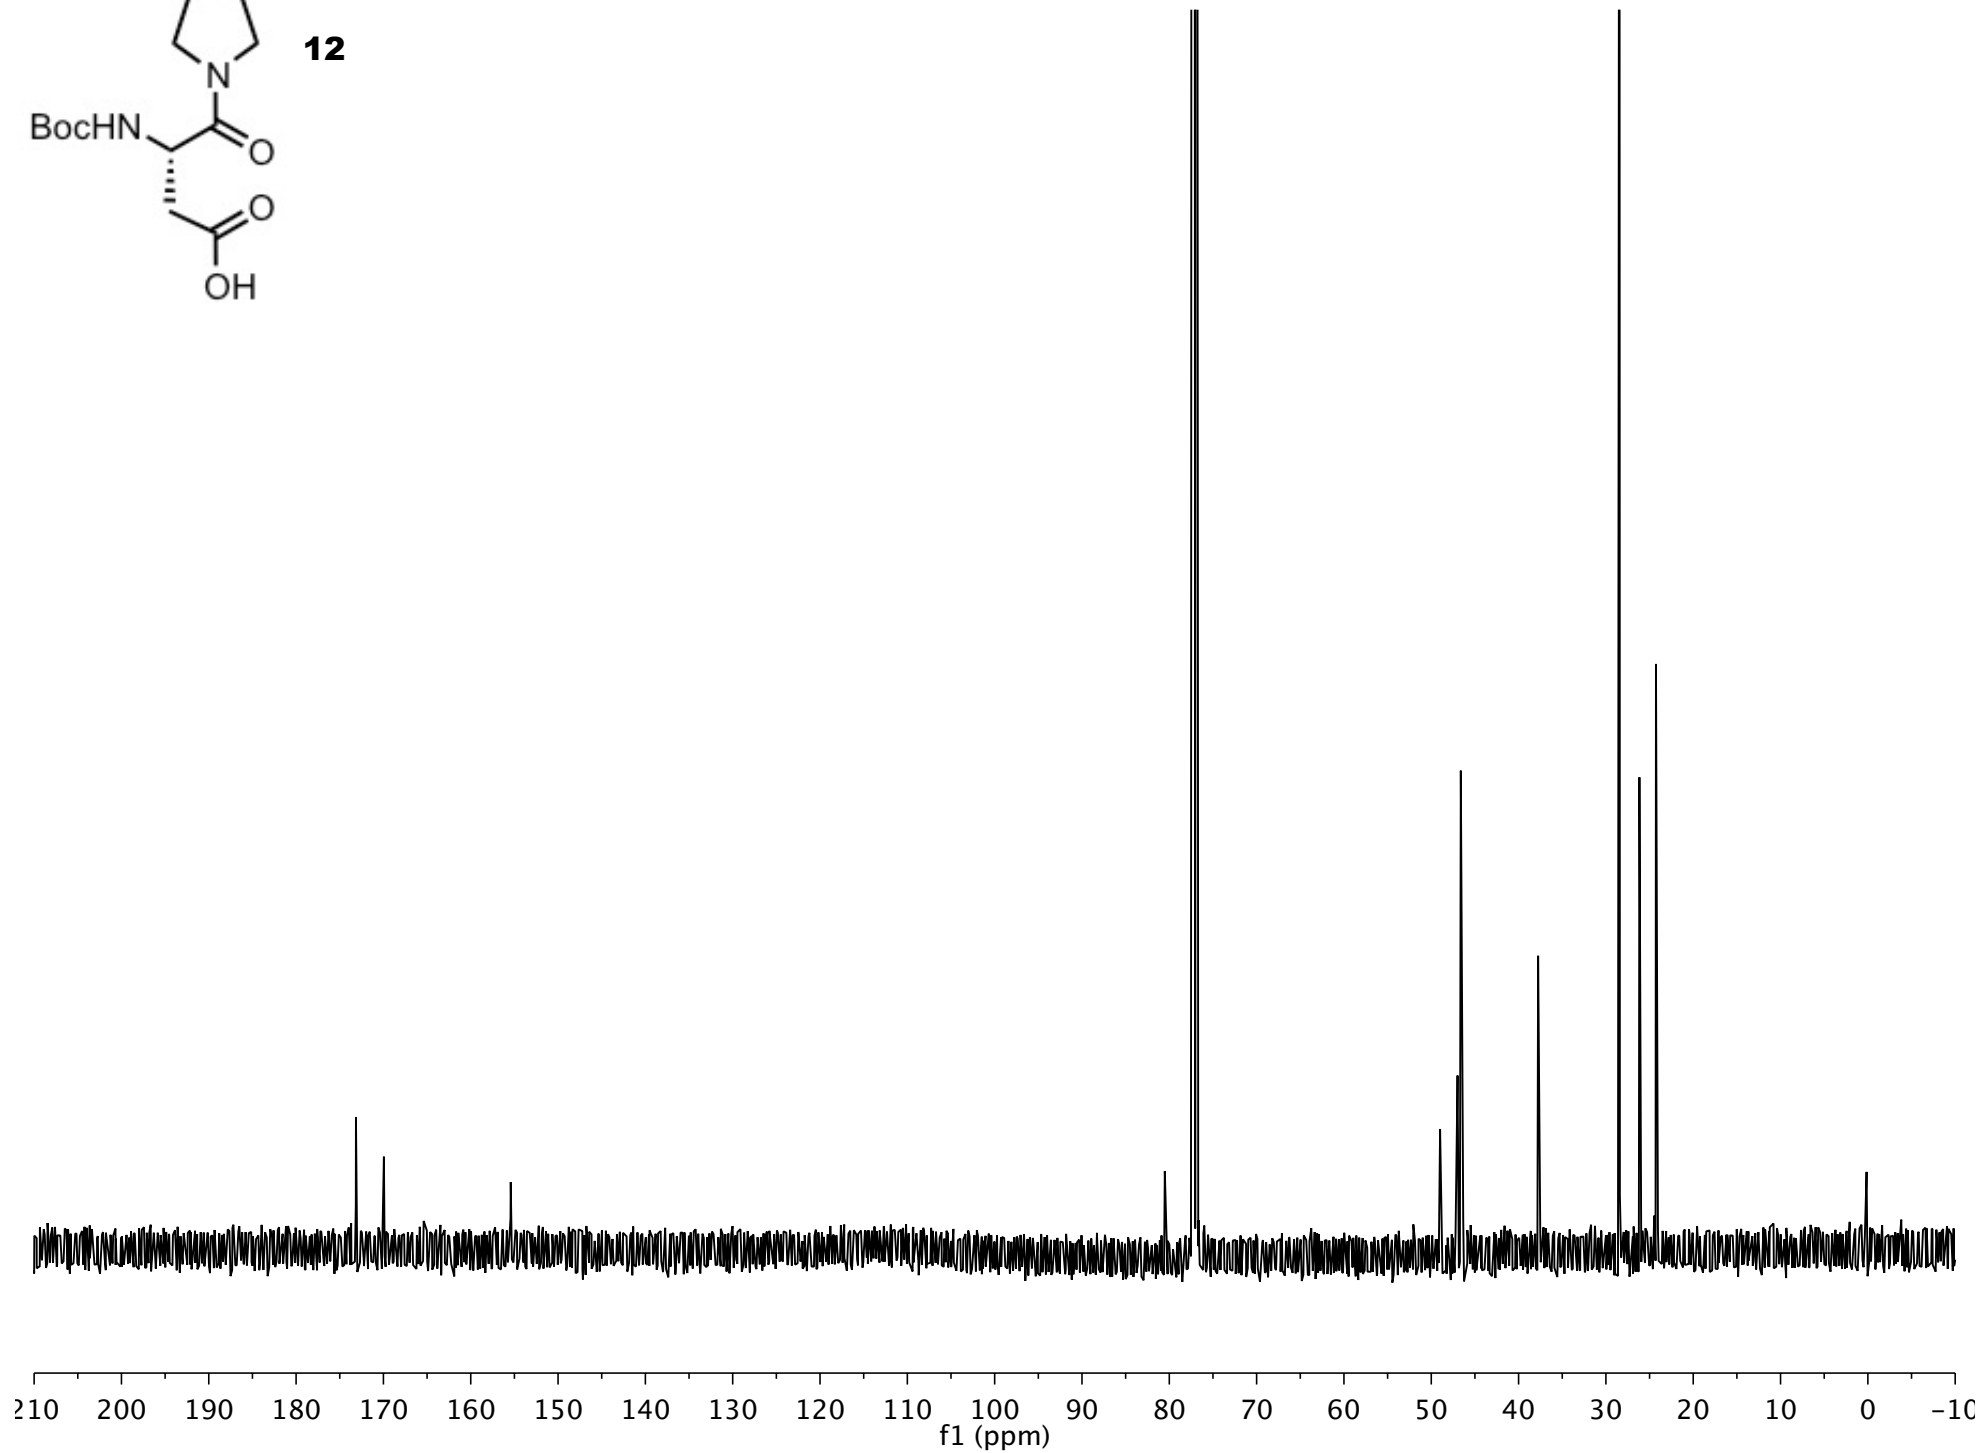



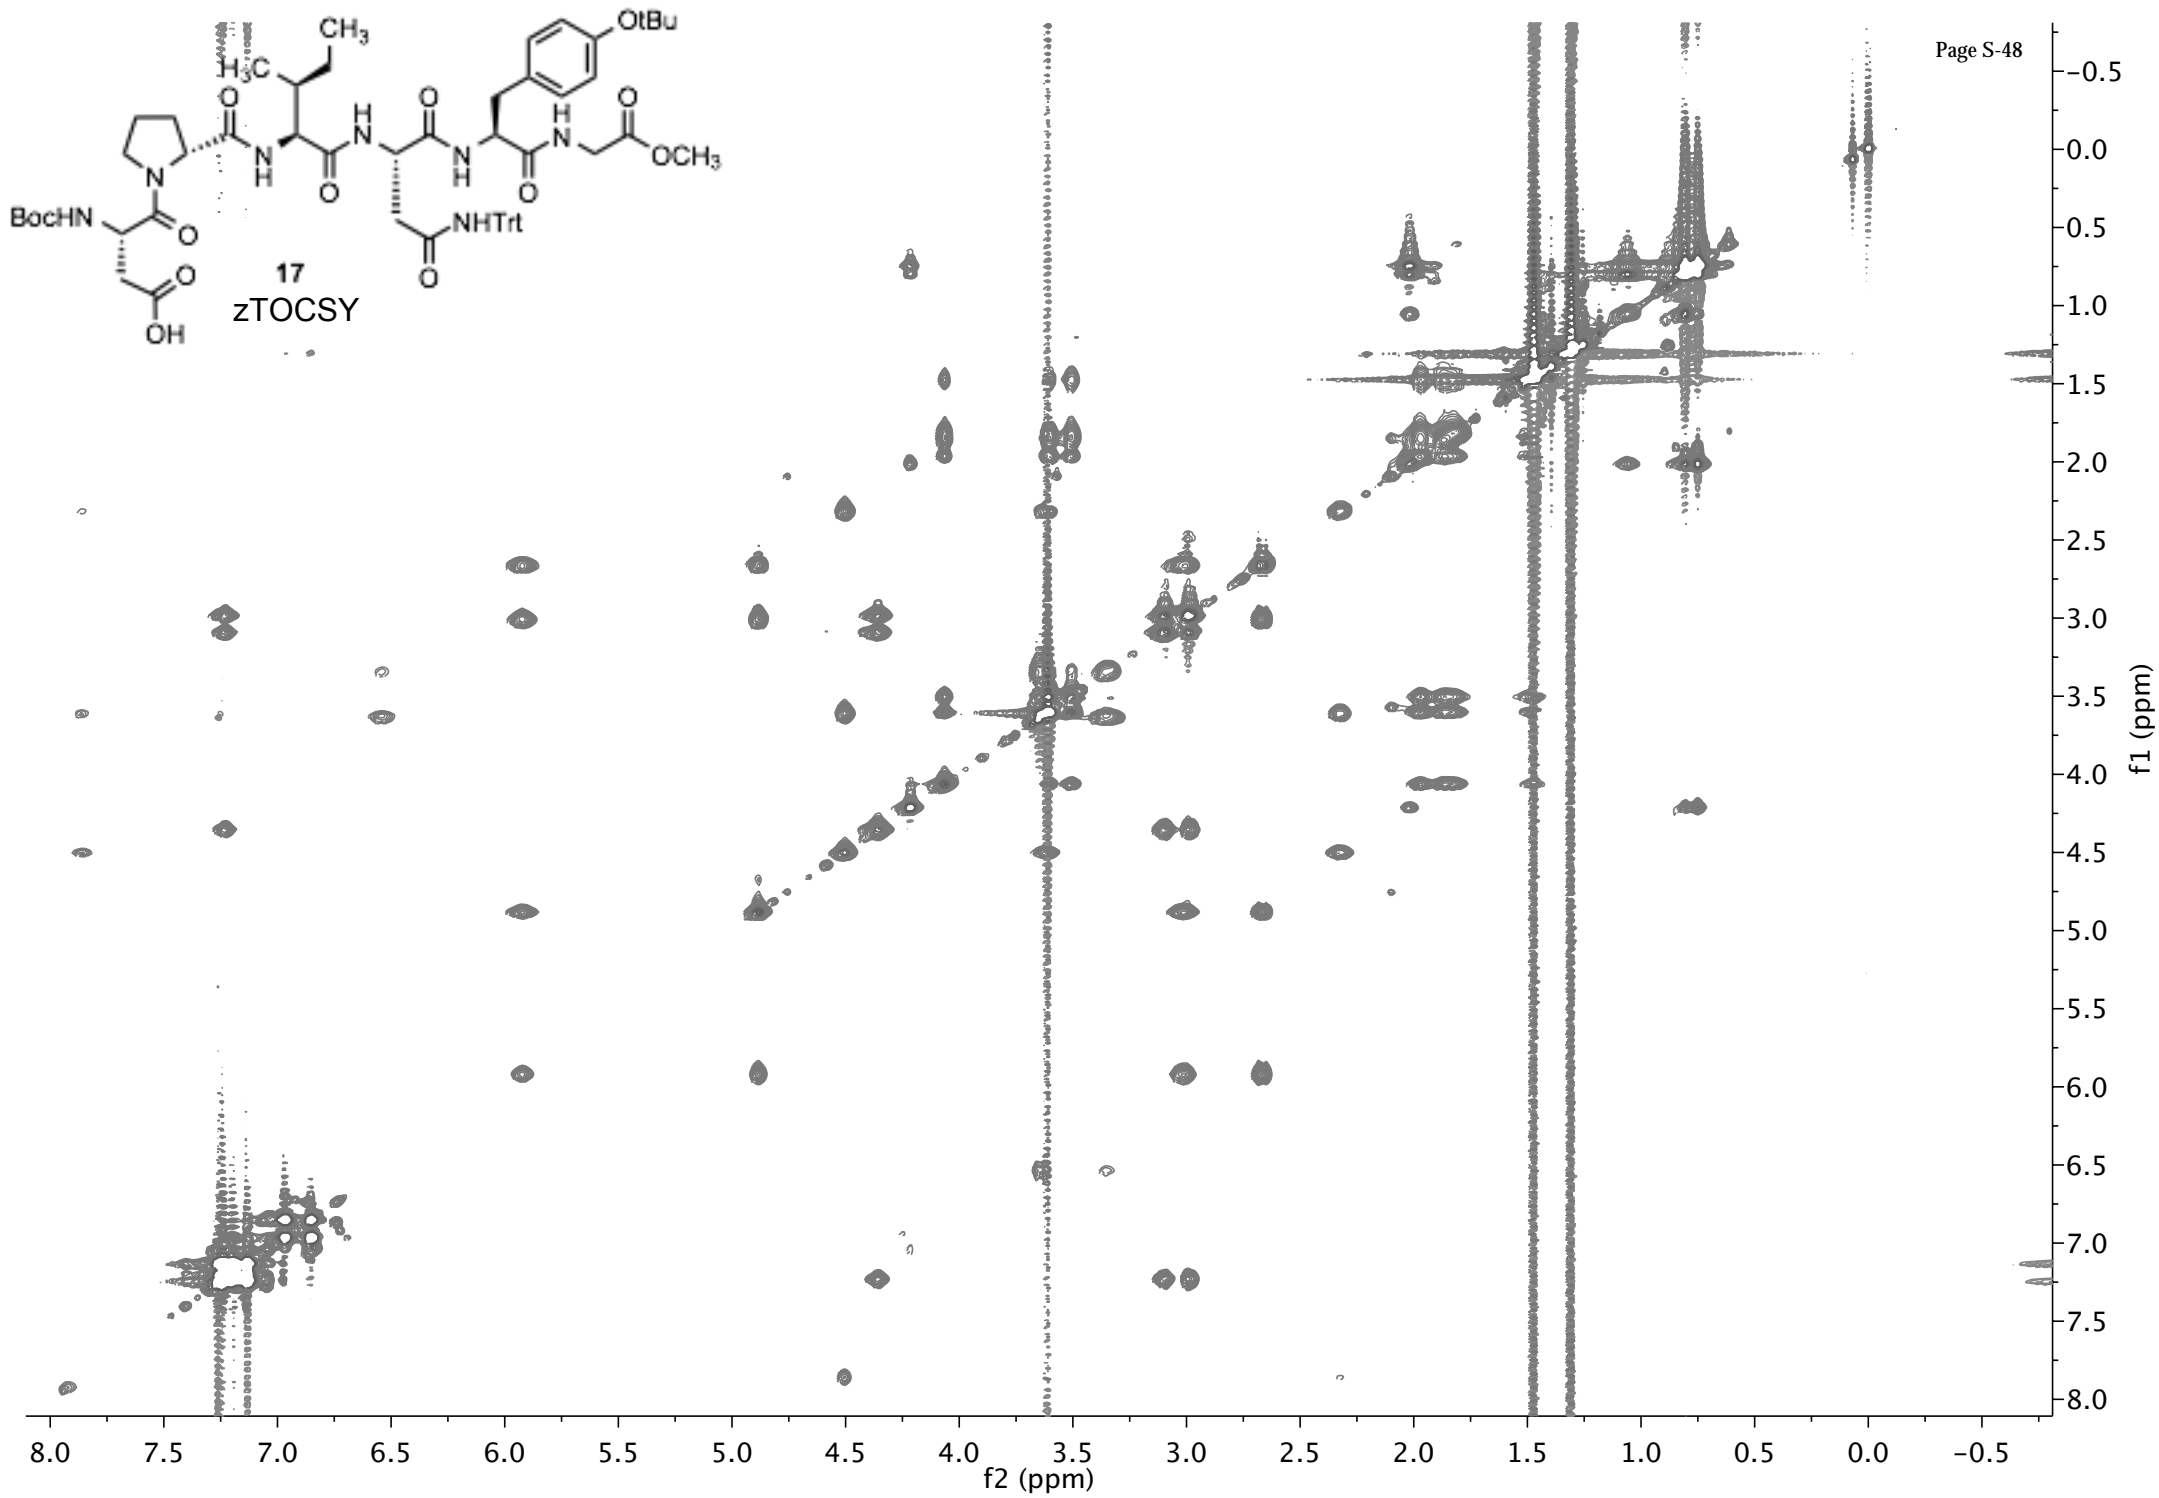



## Crude reaction of mCPBA and difarnesyl ether (18)

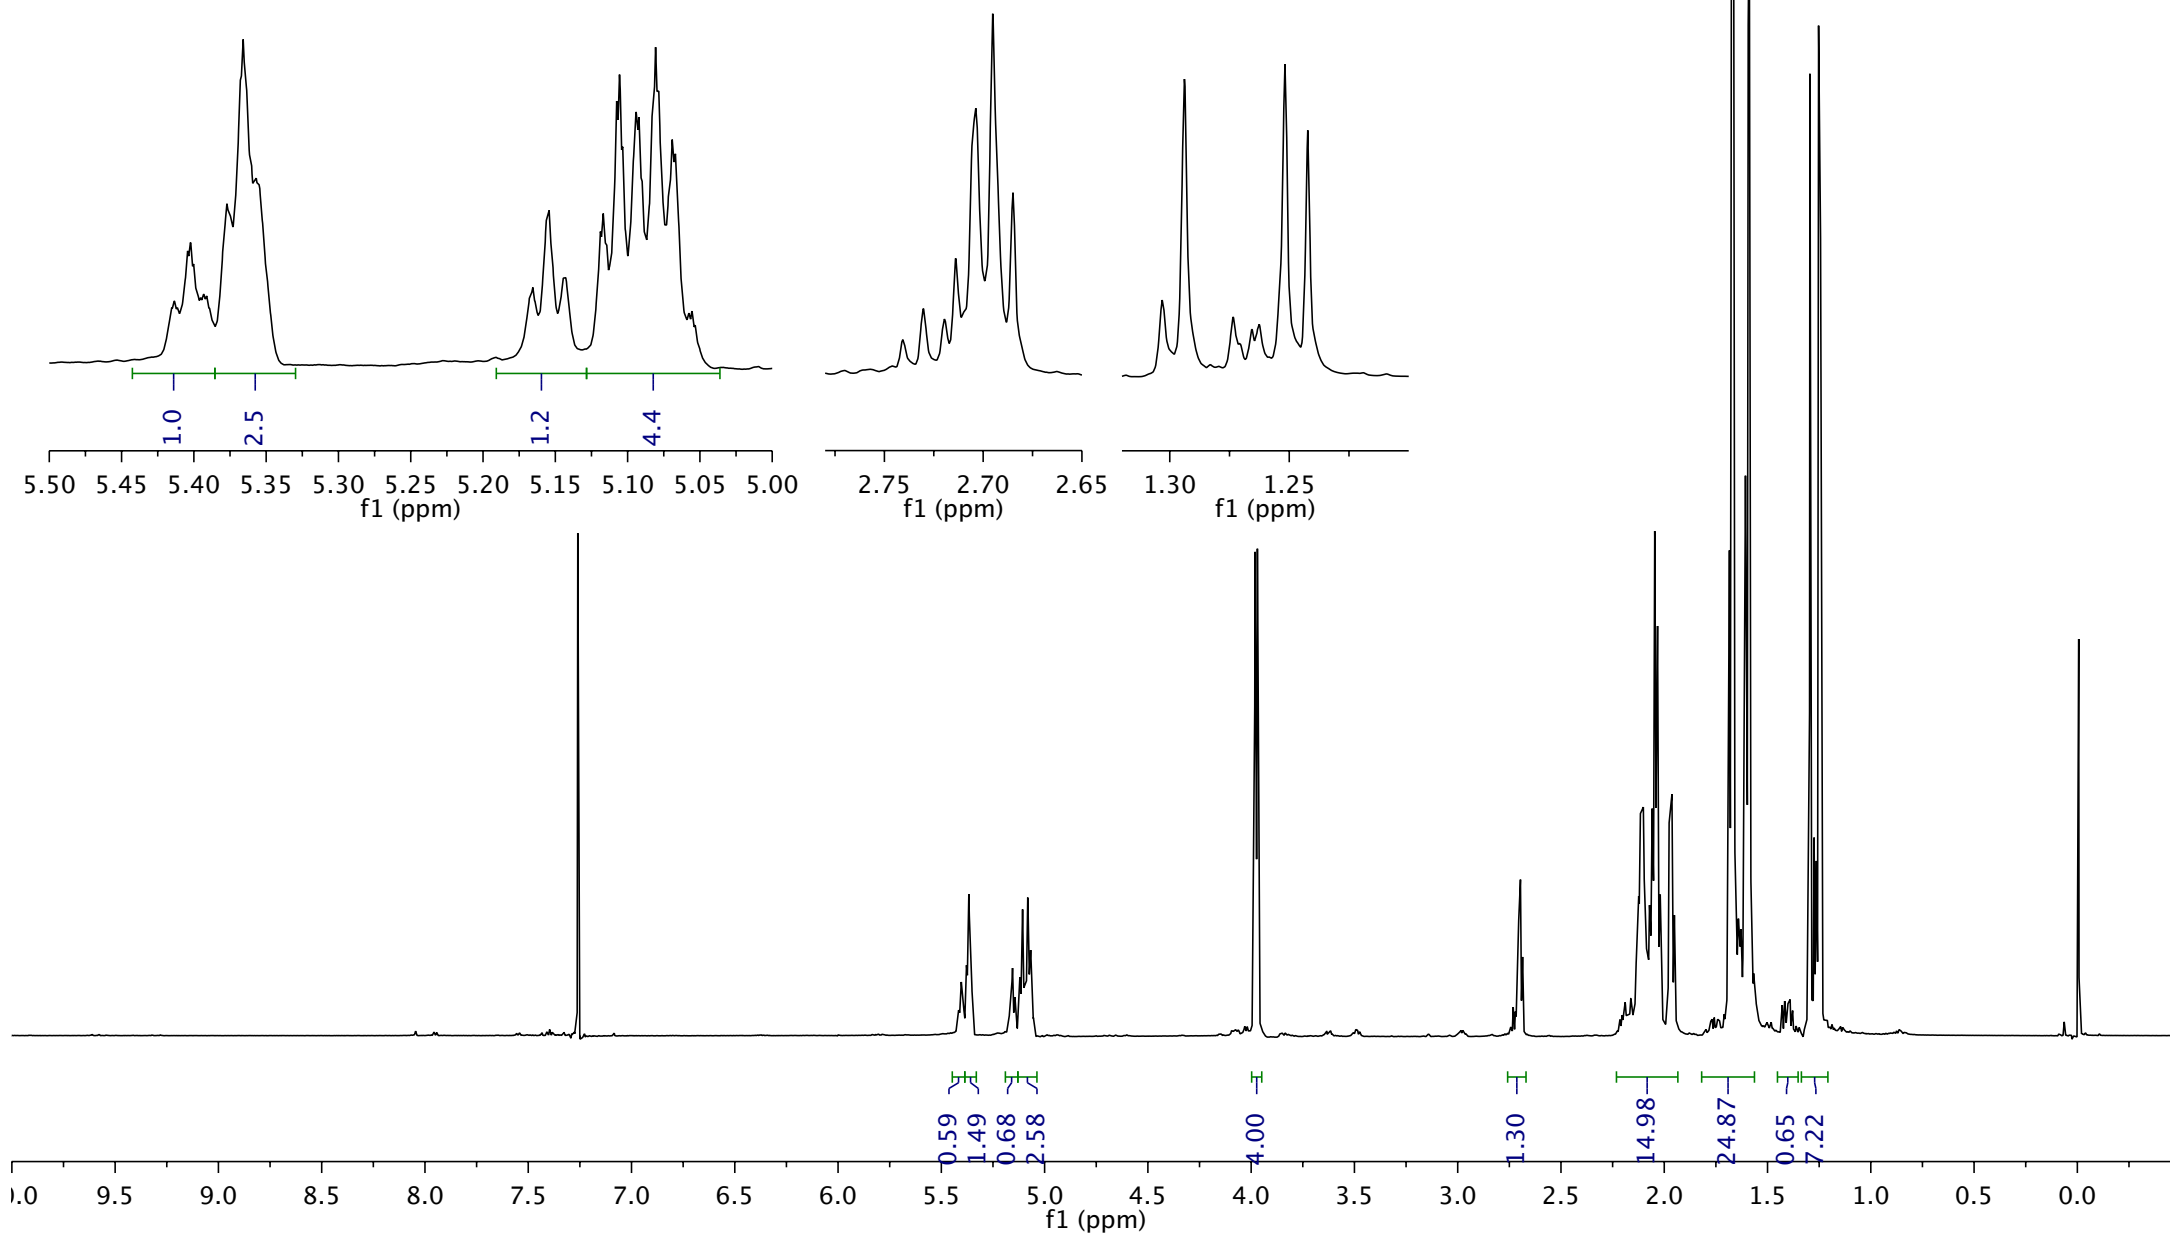

## Crude reaction of catalyst 17 and difarnesyl ether (18)

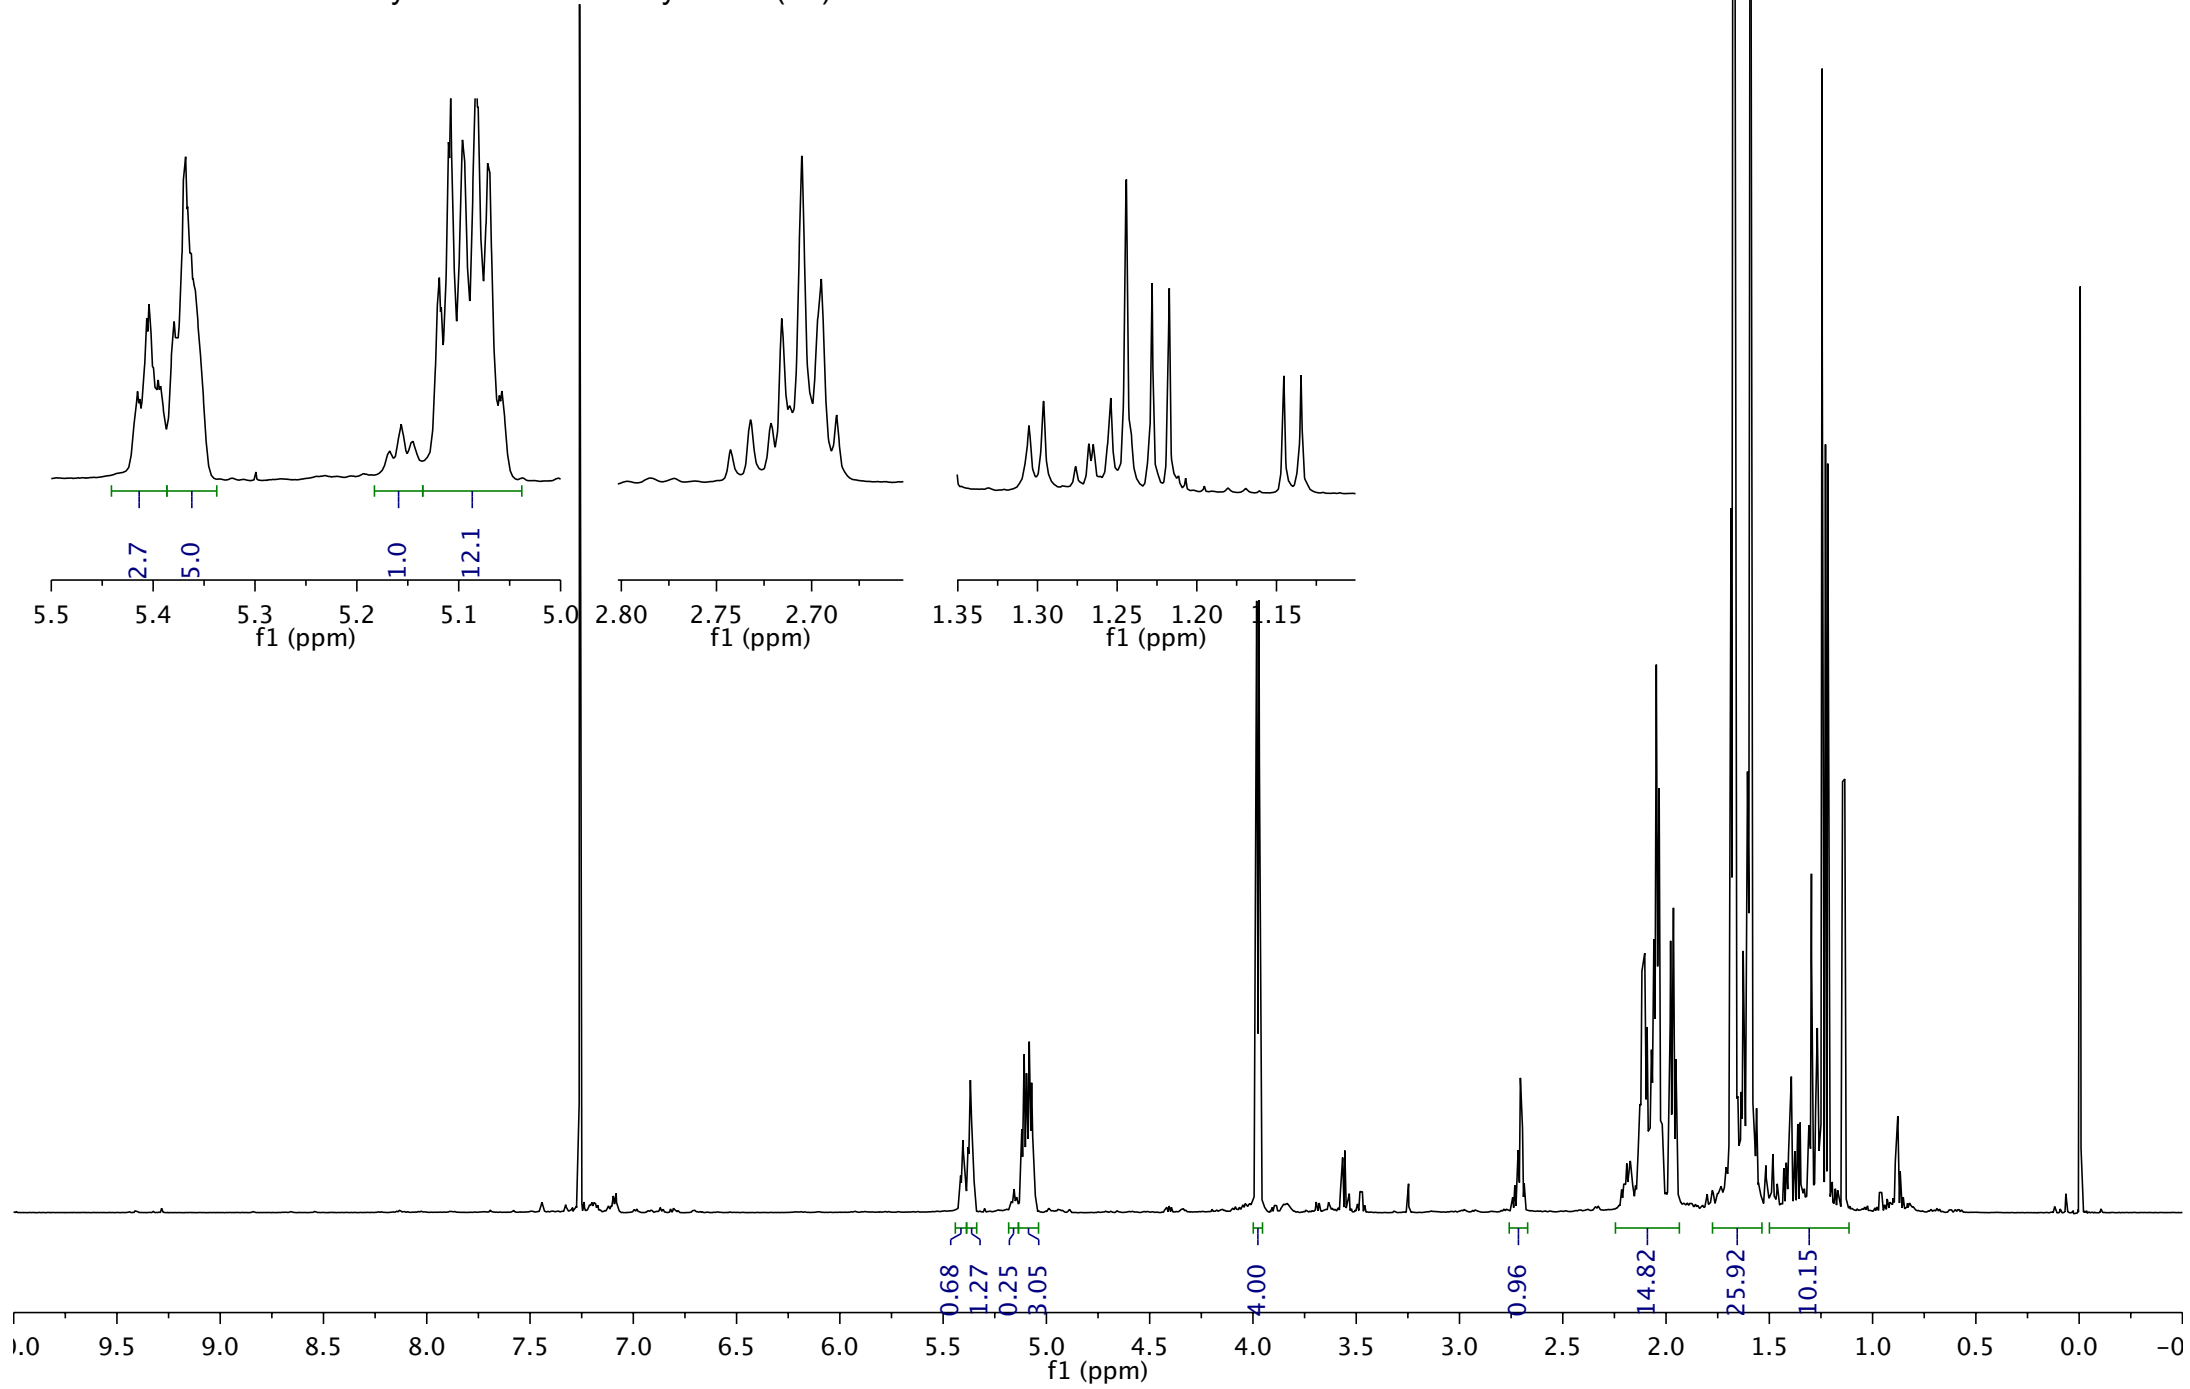

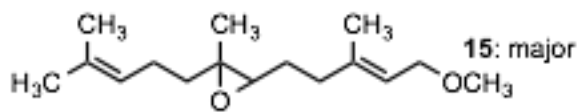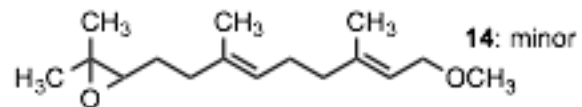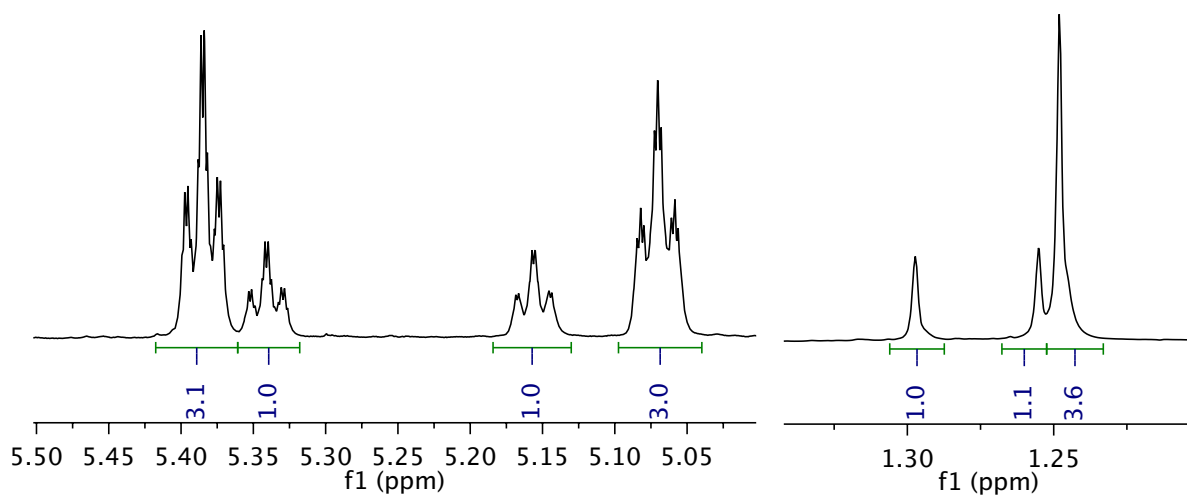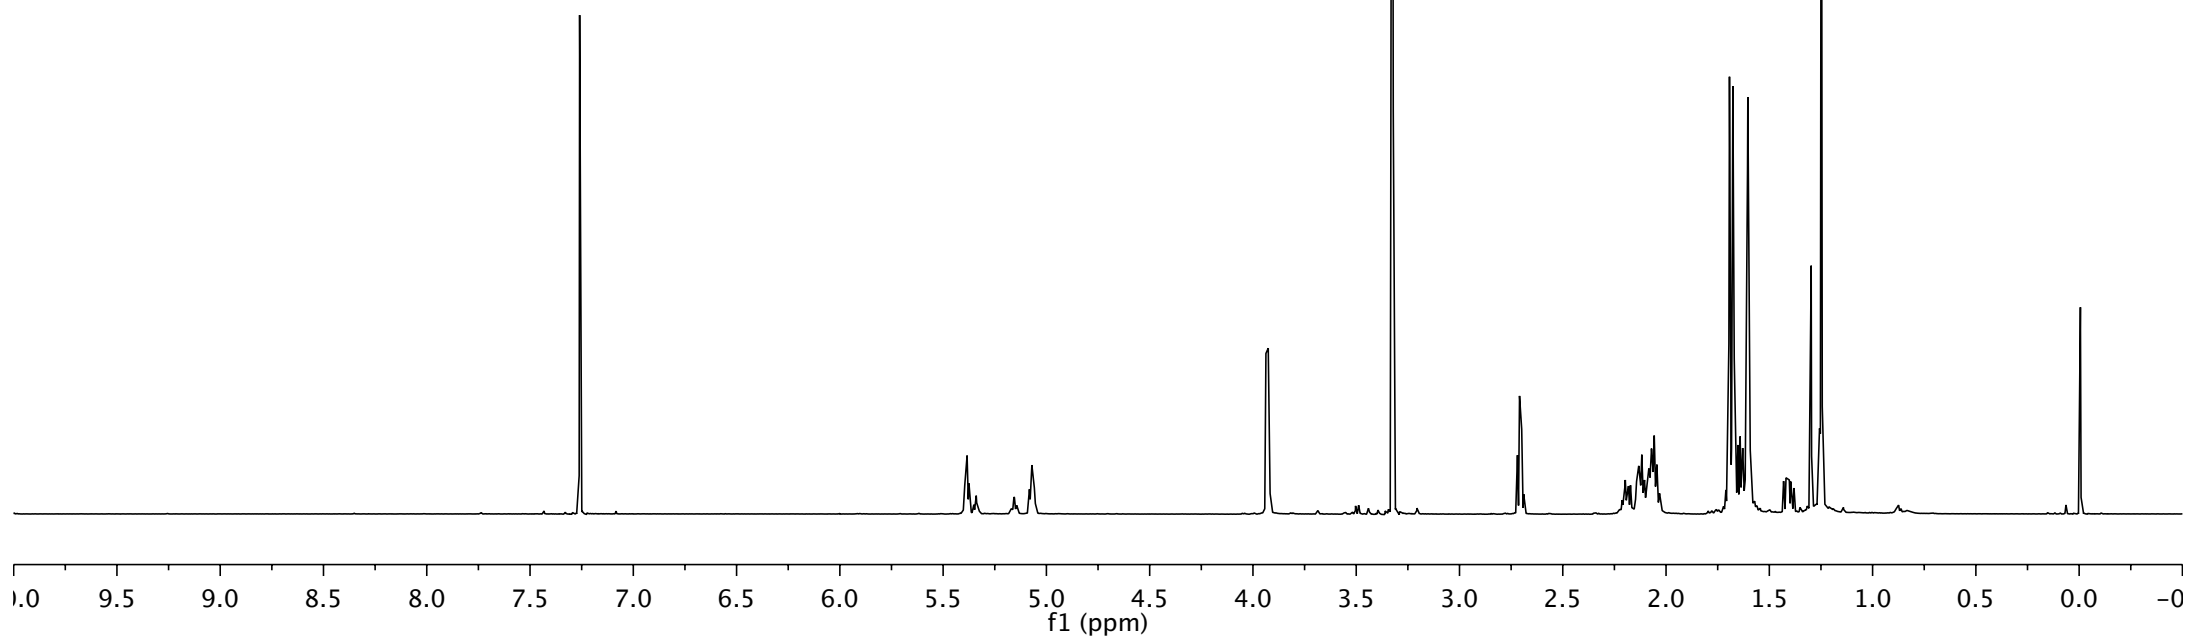

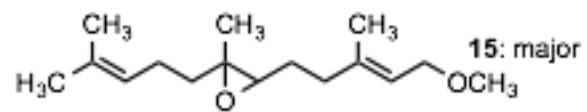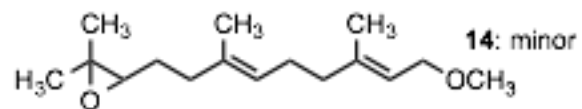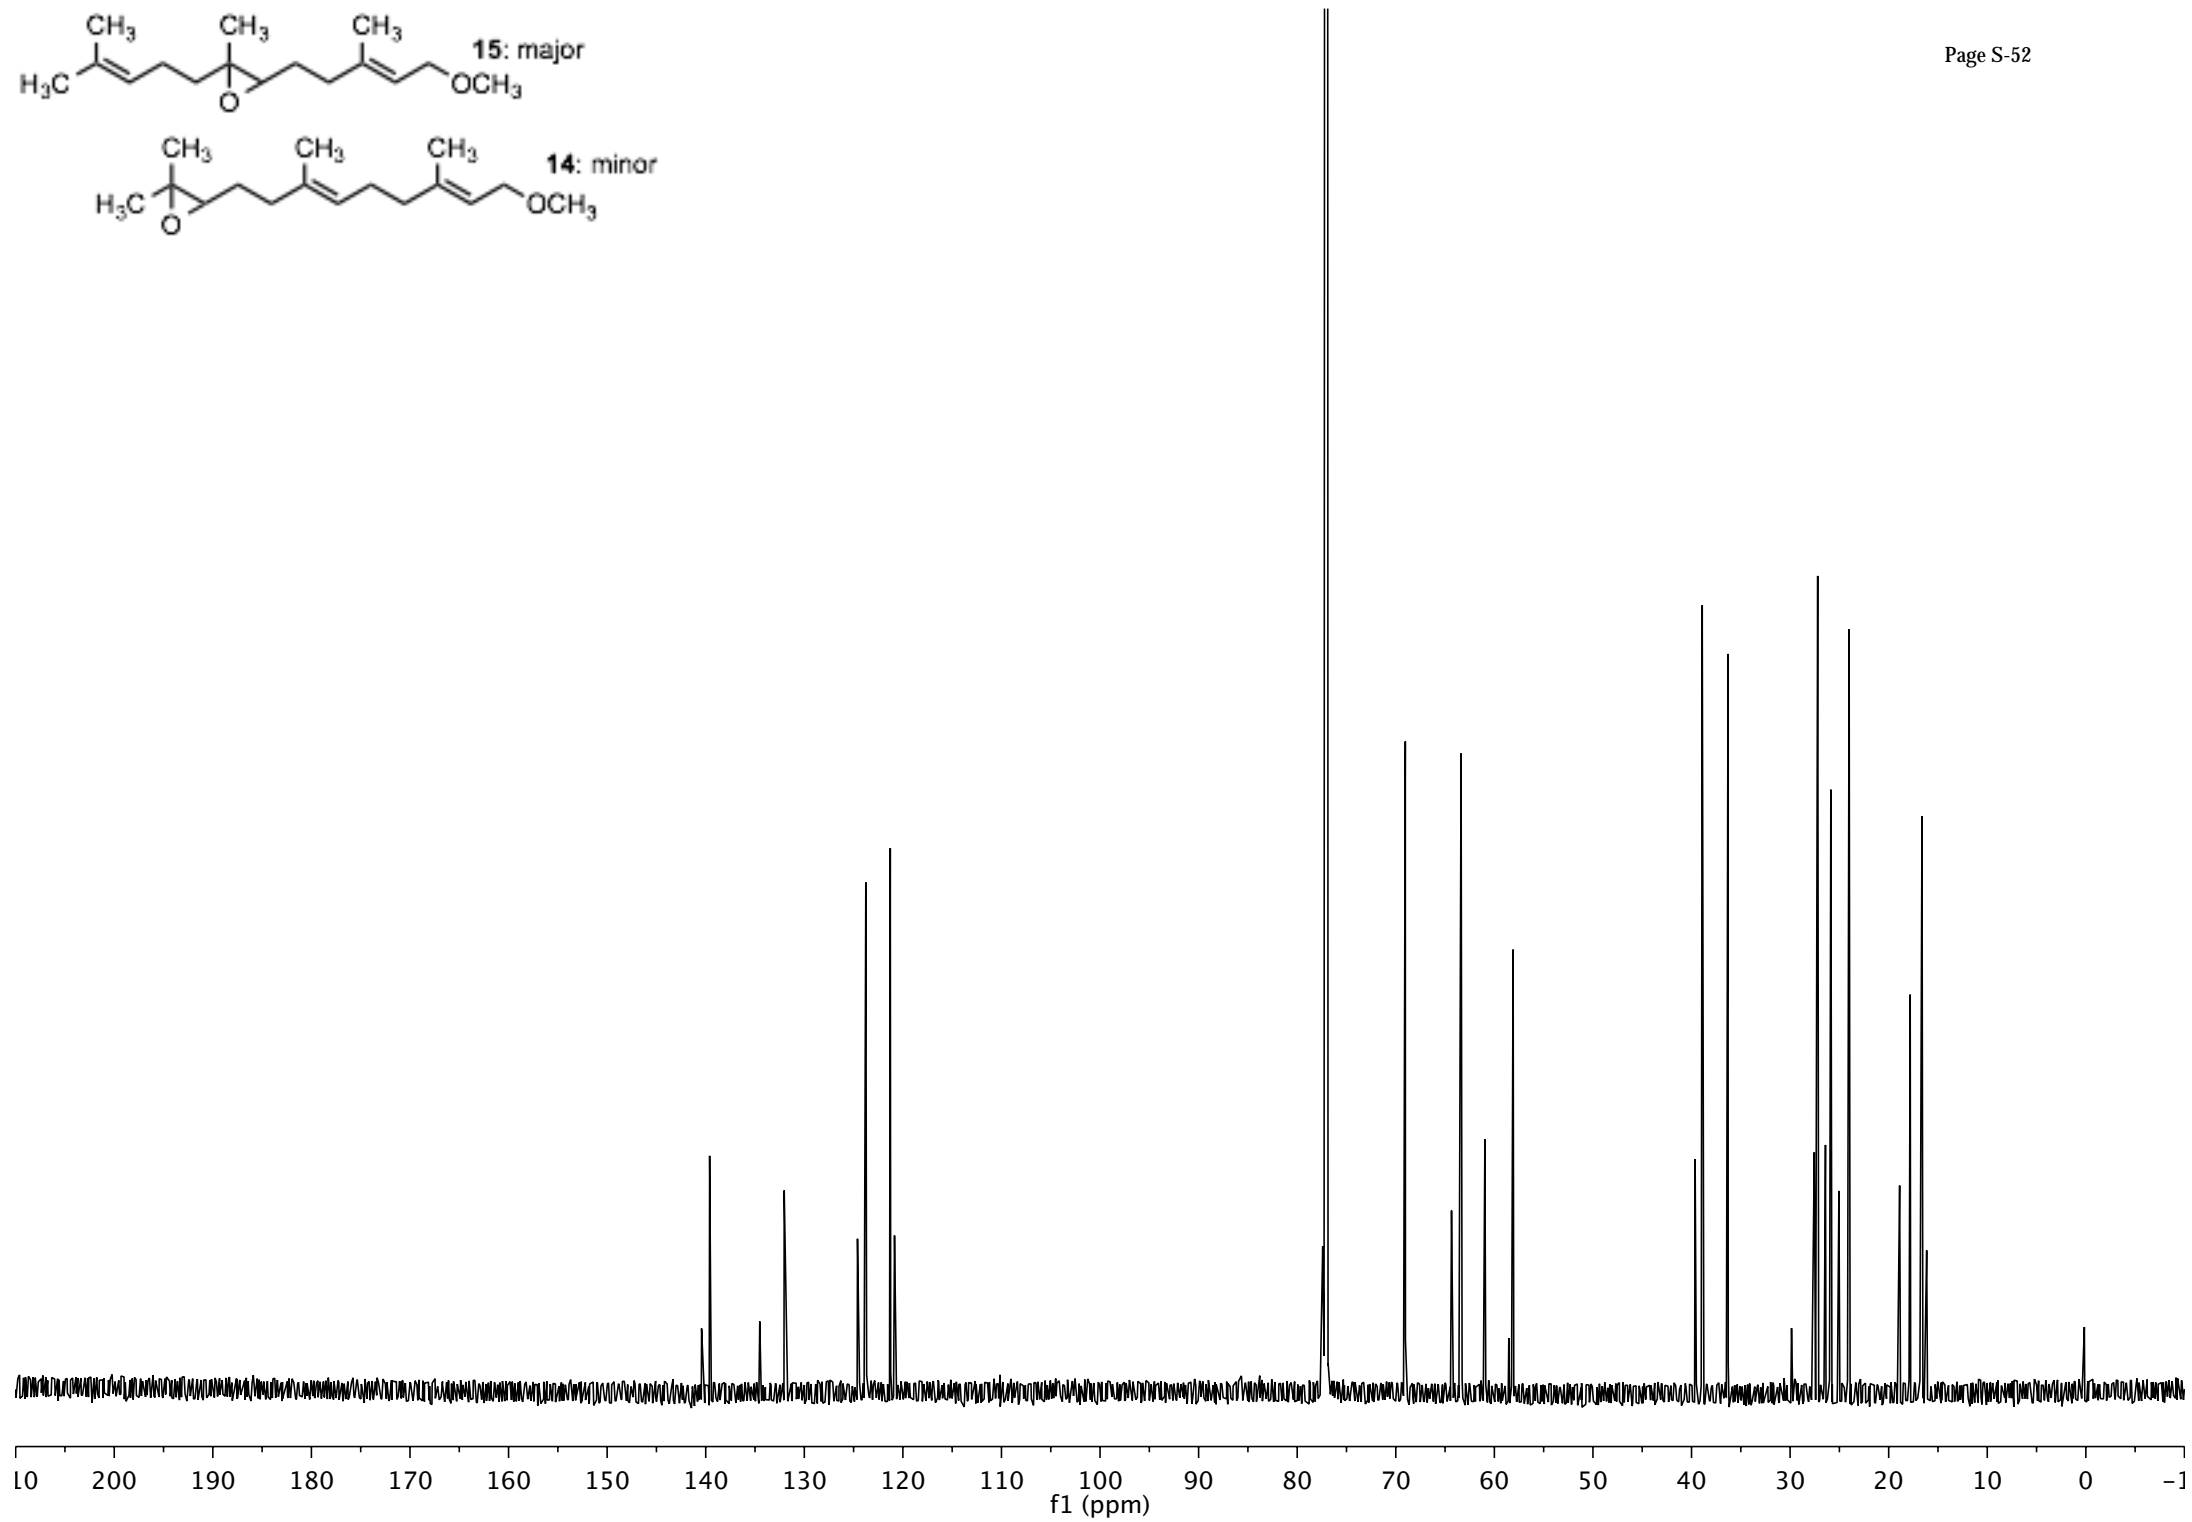

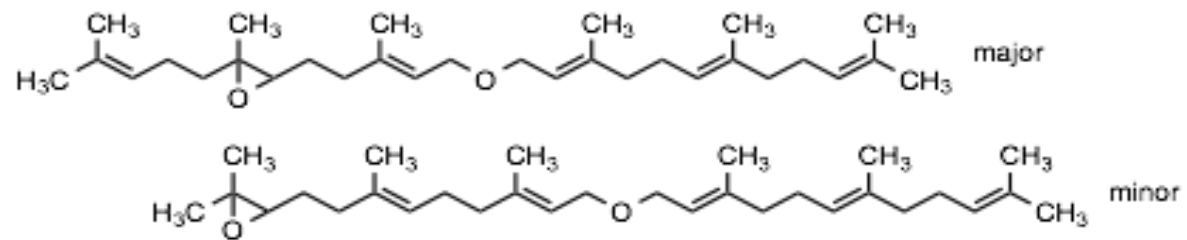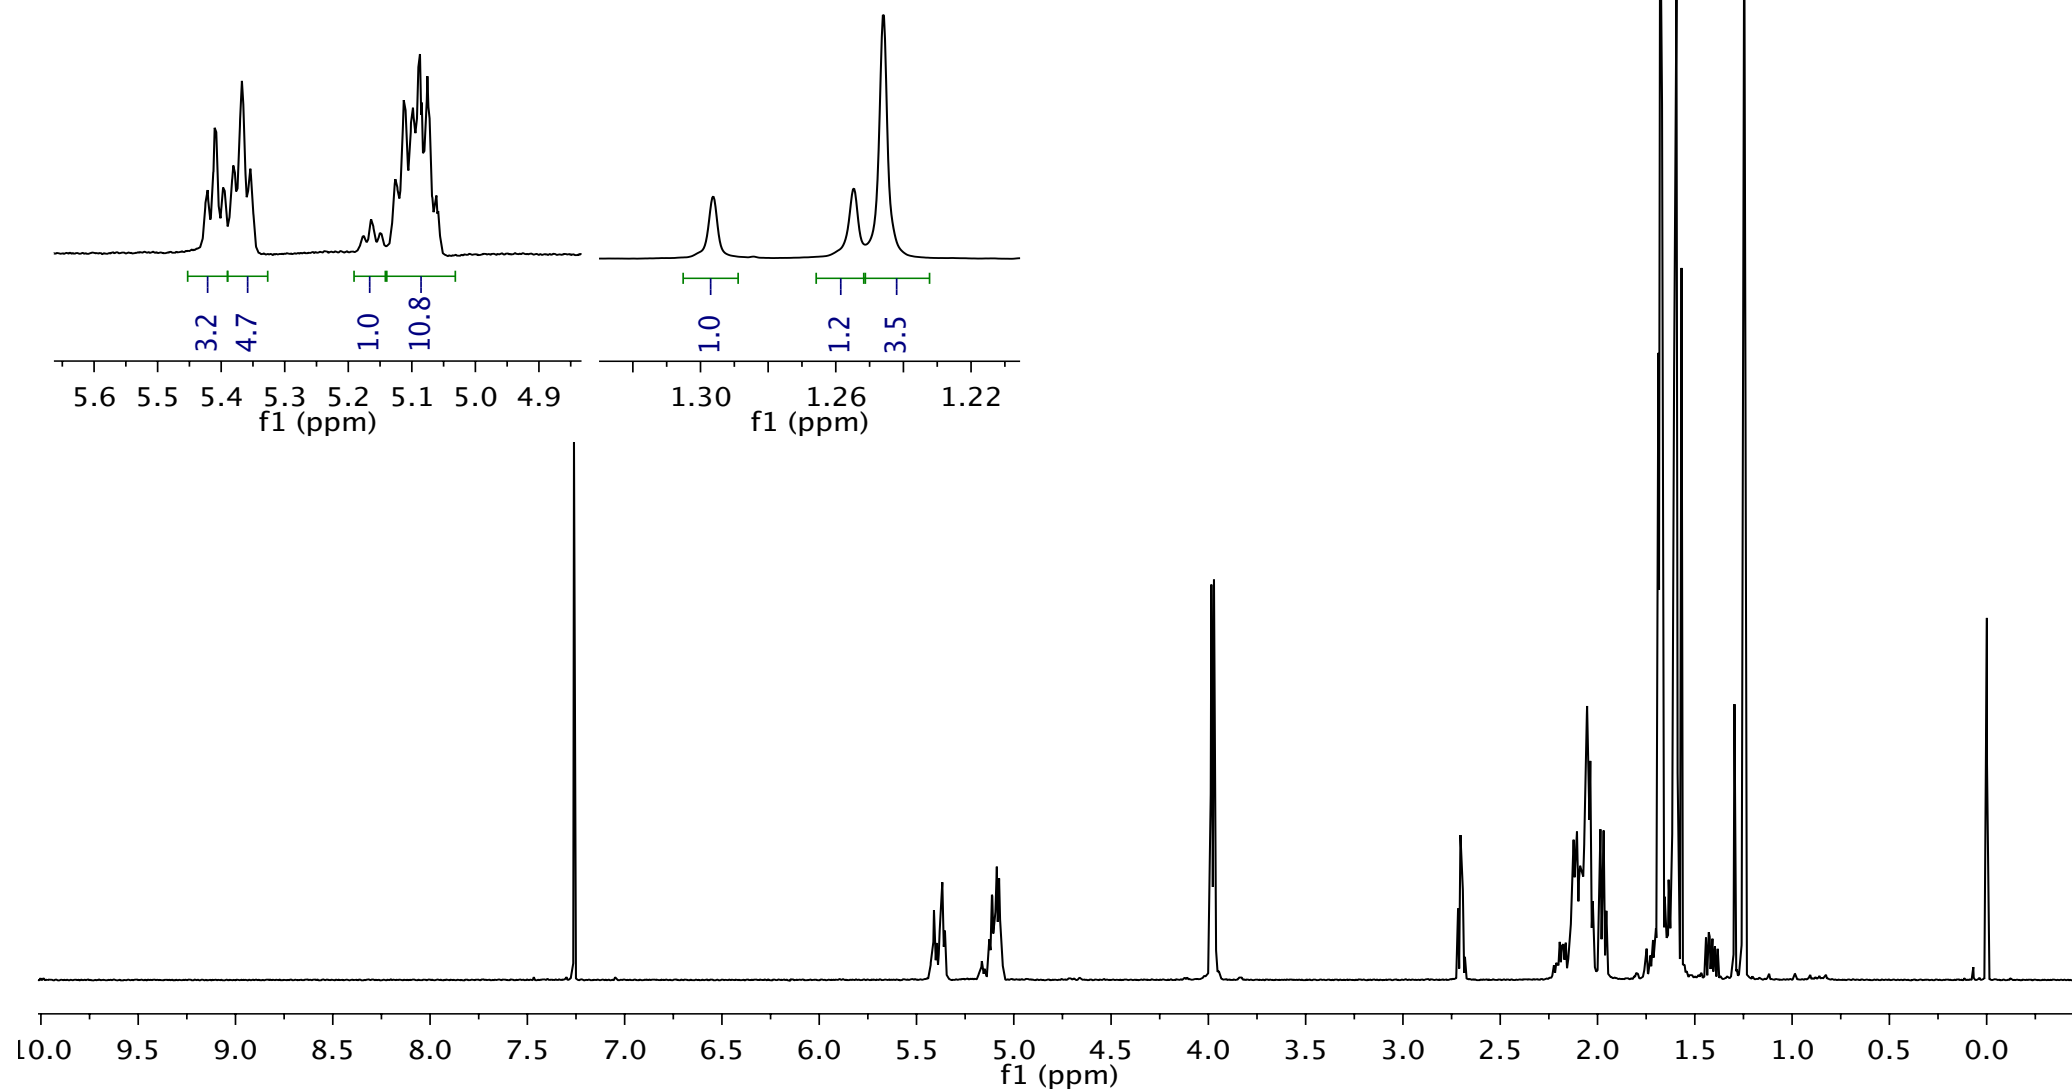

Supplement: ja410567a_si_001.pdf [file ja410567a_si_001.pdf]
